# Supplementary material for: Mechanisms and stereoselectivities of the Rh(i)-catalyzed carbenoid carbon insertion reaction of benzocyclobutenol with diazoester
Source: Royal Society of Chemistry journal article supplement (doi:10.1039/c5ob00608b), 2015-01-01
Supplement: c5ob00608b1.pdf [file c5ob00608b1.pdf]

**Electronic Supplementary Information For**  
**Mechanisms and stereoselectivities of Rh(I)-catalyzed**  
**carbenoid carbon insertion reaction of**  
**benzocyclobutenol with diazoester**

Yanyan Wang, Yang Wang, Wenjing Zhang, Yanyan Zhu, Donghui Wei\*,  
Mingsheng Tang\*

The College of Chemistry and Molecular Engineering, Center of Computational  
Chemistry, Zhengzhou University, Zhengzhou, Henan Province, 450001, PR China

**Table of Contents**

|                                                                                                                                                           |     |
|-----------------------------------------------------------------------------------------------------------------------------------------------------------|-----|
| 1. Test Results of Basis Sets.....                                                                                                                        | S2  |
| 2. Free Energy Profiles of the Entire Reaction .....                                                                                                      | S2  |
| 3. Further AIM and NBO Analyses .....                                                                                                                     | S4  |
| 4. Superposition of M3-Part .....                                                                                                                         | S5  |
| 5. Additional Description for the Fourth Stage.....                                                                                                       | S5  |
| 6. Additional Description for the Fifth Stage .....                                                                                                       | S11 |
| 7. Solvent Effect Analysis .....                                                                                                                          | S13 |
| 8. Cartesian Coordinates of All the Optimized Structures Obtained<br>at the B3LYP/6-31G(d)//LanL2DZ Level in the Solvent Toluene<br>Using CPCM Model..... | S13 |

## 1. Test Results of Basis Sets

To examine the basis set dependence, single-point energy calculations were also done for selected key structures using different functionals and larger basis set. The results show that both the small and large basis sets give the same conclusion. For example, using the smaller basis set, the difference of free energy barriers between **Re\_TS4** and **Si\_TS4** is 3.9 kcal/mol. As shown in **Table S1**, when the larger basis set is used, the difference of free energy barriers between **Re\_TS4** and **Si\_TS4** are 3.7 kcal/mol, 3.3 kcal/mol, 2.9 kcal/mol, 3.2 kcal/mol, 3.6 kcal/mol, respectively.

**Table S1** Comparisons of relative free energies of B3LYP/6-31G\*\*//Lan12dz optimization with single-point refinement for selected stationary points (Unit: a.u.).

|                       |                                    | Optimization | Refinement |             |            |            |                 |
|-----------------------|------------------------------------|--------------|------------|-------------|------------|------------|-----------------|
|                       |                                    | B3LYP        | B3LYP      | M06-L       | M06        | M06        | M06-L           |
| C, H, O, N            |                                    | 6-31G*       | 6-311+G**  |             |            |            | 6-311++G(2d,2p) |
| Rh                    |                                    | Lan12DZ      | Lan12DZ    |             |            | SDD        | Lan12DZ         |
| <b>Re_<br/>TS4</b>    | <i>G</i>                           | -1683.3626   |            |             |            |            |                 |
|                       | <i>G<sub>TC</sub></i> <sup>a</sup> | 0.5049       |            |             |            |            |                 |
|                       | <i>E</i>                           |              | -1684.3153 | -1684.15822 | -1683.1648 | -1684.2165 | -1684.1948      |
|                       | <i>E+</i><br><i>G<sub>TC</sub></i> |              | -1683.8104 | -1683.6533  | -1682.6599 | -1683.7116 | -1683.6899      |
| <b>Si_<br/>TS4</b>    | <i>G</i>                           | -1683.3689   |            |             |            |            |                 |
|                       | <i>G<sub>TC</sub></i>              | 0.5027       |            |             |            |            |                 |
|                       | <i>E</i>                           |              | -1684.3191 | -1684.1614  | -1683.1672 | -1684.2188 | -1684.1980      |
|                       | <i>E+</i><br><i>G<sub>TC</sub></i> |              | -1683.8163 | -1683.6587  | -1682.6645 | -1683.7161 | -1683.6953      |
| $\Delta G$ (kcal/mol) |                                    | 3.9          | 3.7        | 3.3         | 2.9        | 3.2        | 3.6             |

<sup>a</sup> *G<sub>TC</sub>* represents “Thermal correction to Gibbs Free Energy”. *G* and *E* represent “Gibbs free energy” and “electronic energy”, respectively.

## 2. Free Energy Profiles of the Entire Reaction

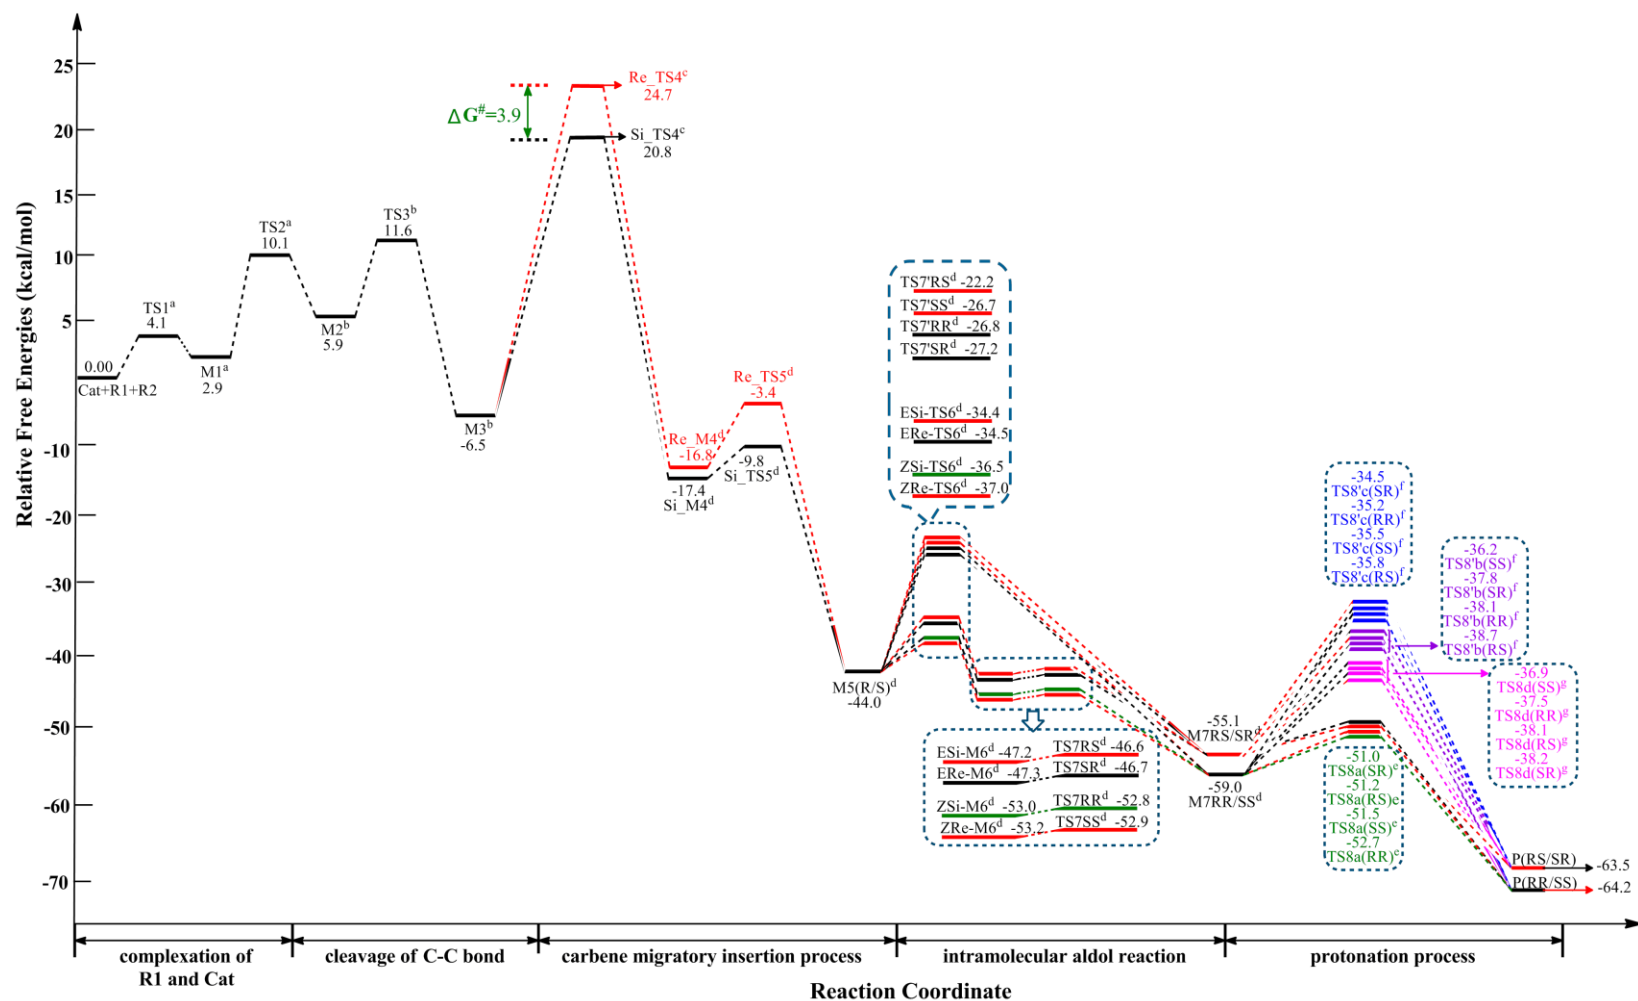

**Fig.S1** Free energy profiles of the entire catalytic cycle (unit: kcal/mol, the superscripts “a ~ g” represent adding the energy of **R2**, **H<sub>2</sub>O** plus **R2**, **H<sub>2</sub>O**, **H<sub>2</sub>O** plus **N<sub>2</sub>**, **N<sub>2</sub>**, **N<sub>2</sub>** minus **R1**, **N<sub>2</sub>** minus **R1** plus **H<sub>2</sub>O**, respectively).

### 3. Further AIM and NBO Analyses

Topology analysis of electron density is a main ingredient of Bader's atom in molecules (AIM) theory. Here, to further prove the interaction of Rh and benzene ring of **M2**, the topology analysis of electron density is performed using MULTIWFN program. As can be seen in **Fig.S2a** obviously, the index 1 corresponds to the bond critical point (BCP) of Rh- $\pi$  bond. What's more, **Fig.S2b** shows the strong interaction of Rh- $\pi$  clearly. As summarized in **Table S2**, the value of NBO charge of phenyl group and C5 atom in **R1** is 0.24 e increases to 0.36 e in **M2**, whereas the value of NBO charge of Rh in **Cat** is 0.41 e reduces to 0.27 e in **M2**, indicating that Rh obtains electron from the phenyl group and C5 atom.

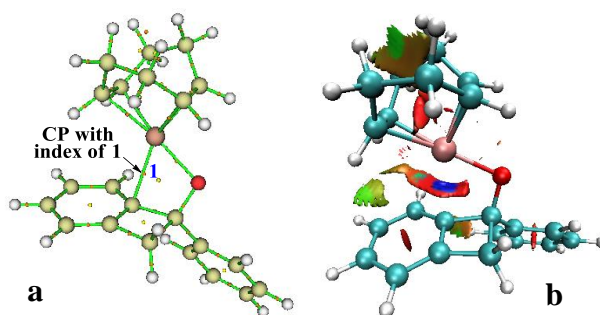

**Fig.S2** (a) AIM analysis for **M2**, orange spheres correspond to (3, -1) critical points, the indices of CPs are labeled by blue number; (b) Interaction analysis (blue, strong attraction; green, weak interaction) for **M2**.

**Table S2** The values of NBO charge on the “phenyl group + C5 atom” and Rh atom in **R1**, **Cat** and **M2** (unit: e)

|            | Phenyl group + C5 atom | Rh   |
|------------|------------------------|------|
| <b>R1</b>  | 0.24                   |      |
| <b>Cat</b> |                        | 0.41 |
| <b>M2</b>  | 0.36                   | 0.27 |

## 4. Superposition of M3-Part

Further investigation about the distortion of **M3** part has been conducted. As shown in **Fig.S3**, the distortion mainly comes from two parts (i.e. A and B), while of the two parts, part B plays more important role in this step process. The superposition between M3-parts of **M3** and **Si\_TS4** are better than **Re\_TS4**. Which is mainly responsible for the lower distortion energies via **Si\_TS4**.

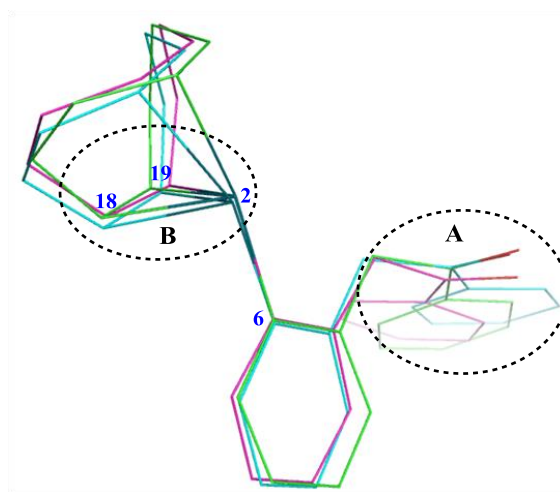

**Fig.S3** Superposition of M3-part from **M3** (green), **Si\_TS4** (pink) and **Re\_TS4** (cyan) (the hydrogen atoms are omitted).

## 5. Additional Description for the Fourth Stage

**Enol-Type mechanism (Path A):** Scheme S1 illustrates the detailed reaction processes of the enol-type aldol reaction pathway, from which we can see the enol-type mechanism includes two steps: tautomerism between **M5** and **M6** (i.e. the first step) and intramolecular aldol-type reaction (i.e. the second step). In the first step, **M5(R/S)** could correspondingly convert to **M6(ZRe-M6/ESi-M6/ERe-M6/ZSi-M6)** via transition states **TS6(ZRe-TS6/ESi-TS6/ERe-TS6/ZSi-TS6)**. The next step is the intramolecular aldol-type reaction of intermediates **M6(ZRe-M6/ESi-M6/ERe-M6/ZSi-M6)** to form intermediates **M7(SS/RS/SR/RR)**

via transition states **TS7(SS/RS/SR/RR)**, respectively. The specific attack modes of the transition states **TS6** and **TS7** are presented in **Scheme S2**. As shown in **Scheme S2**, the intramolecular attack from the C8 atom with *E*- or *Z*-isomerism of C8=C10 double bond to the C5 atom with *Re*- or *Si*- face of the carbonyl group can afford correspondingly four distereoisomers **M7(SR/RS/SS/RR)**, respectively. The distance changes of Rh2–O11, Rh2–C8, C10–C8, C8–C5, C5–O3 and O3–Rh2 summarized in **Table S2** and **Fig.S4** reveal the gradual accomplishment of this stage.

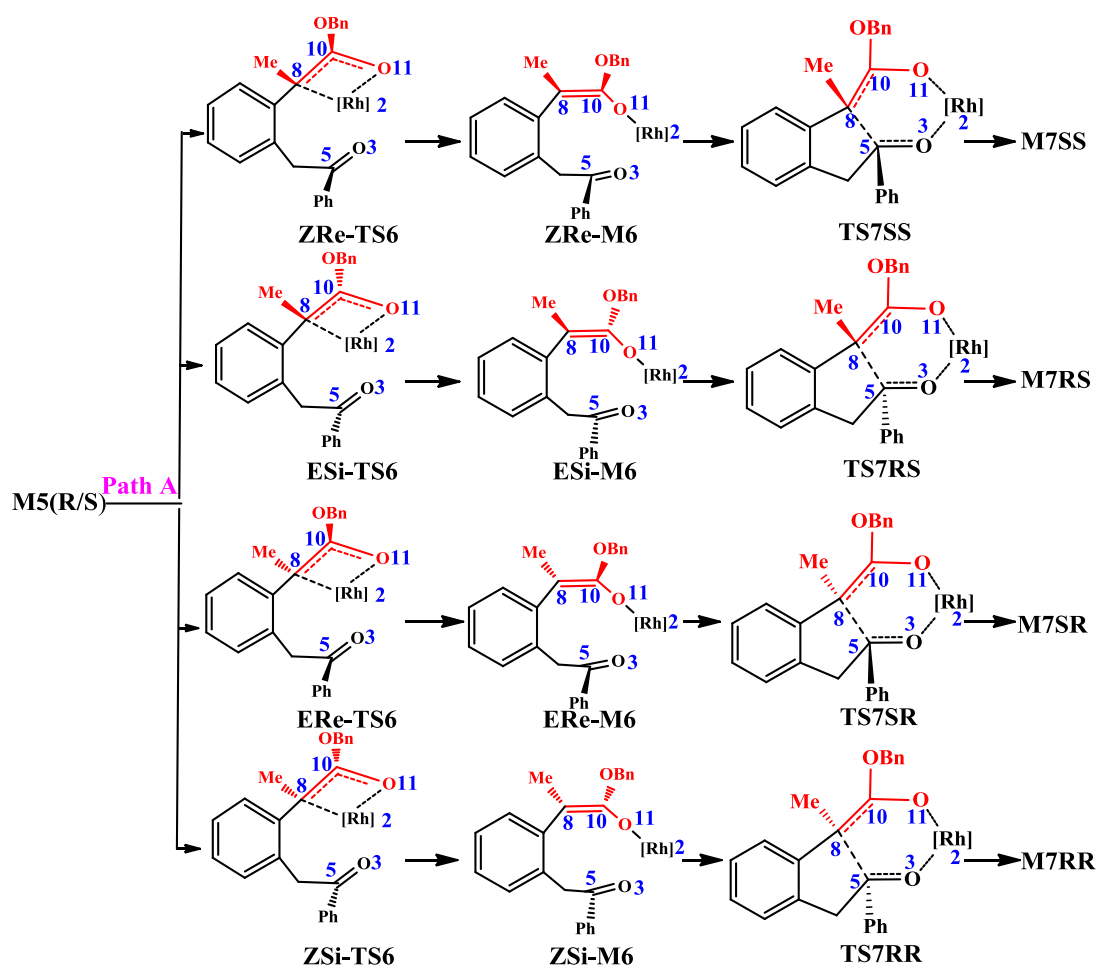

**Scheme S1** Possible reaction modes in Path A in the fourth stage

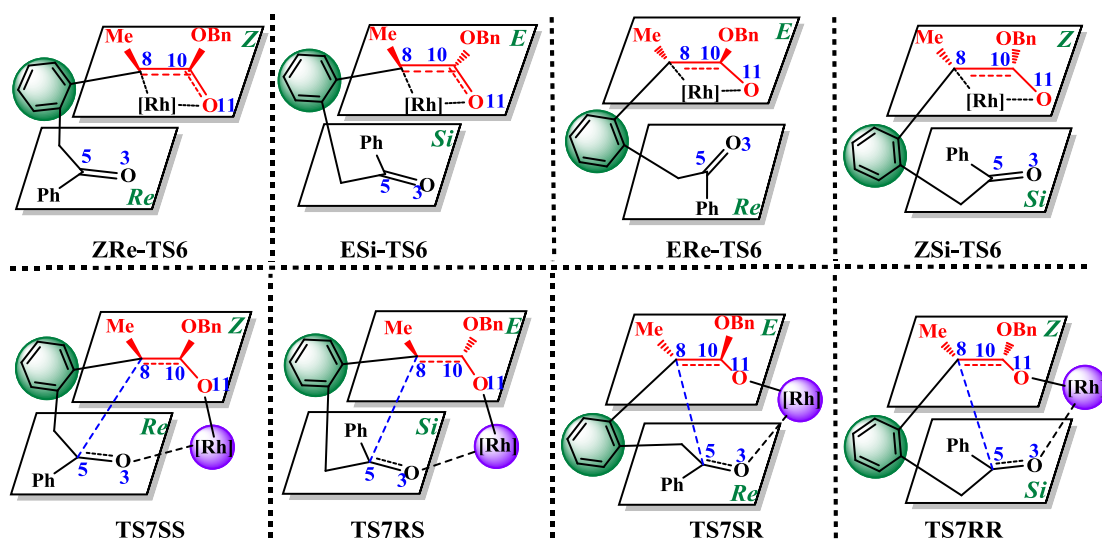

**Scheme S2** Different modes for the intramolecular aldol reaction transition states of Path A

**Ketone-Type mechanism (Path B):** Scheme S3 depicts the detailed reaction process of the ketone-type aldol reaction pathway in the fourth stage, and the specific attack faces in **TS7'** are presented in Scheme S4. In this path, the *Re/Si*-face attack on C5 atom of carbonyl group by C8 atom in **M5(R/S)**, concerted with the breaking of C8–Rh2 bond leads to four diastereoisomers **M7(SR/RR/RS/SS)** via transition states **TS7'(SR/RR/RS/SS)**, respectively. In this stage, four possible reaction patterns should be involved: the C8 atom can attack either the *Re* or *Si* face of the carbonyl group to participate in the intramolecular aldol reaction. The attack on the *Re*- or *Si*-face of the carbonyl group (Scheme S4) by the *R*-configuration of the C8 atom can lead to the diastereoisomeric intermediates **M7SR** and **M7RR**, respectively. Whereas the attack on the *Re*- or *Si*-face of the carbonyl group (Scheme S4) by the *S*-configuration of the C8 atom can lead to the diastereoisomeric intermediates **M7RS** and **M7SS**, separately. The distance changes of C5–C8 and C8–Rh2 summarized in Table S3 (in the supporting information) and Fig.S4 reveal that the gradual accomplishment of this stage.

As shown in Fig.S1, the energy barriers of the tautomerism step are 9.6 (via **ESi-TS6**), 7.0 (via **ZRe-TS6**), 7.5 (via **ZSi-TS6**) and 9.5 (via **ERe-TS6**) kcal/mol, separately, and those of the following intramolecular aldol-type reaction processes via

**TS7RS**, **TS7SR**, **TS7RR**, **TS7SS** are 0.6, 0.6, 0.2, and 0.3 kcal/mol in Path A, separately, while those energy barriers via Path B are 21.8 (via **TS7'RS**), 17.3 (via **TS7'SS**), 17.2 (via **TS7'RR**), 16.8 (via **TS7'SR**) kcal/mol, respectively. Obviously, the enol-type mechanism (Path A) is more energy favorable than the ketone-type mechanism (Path B).

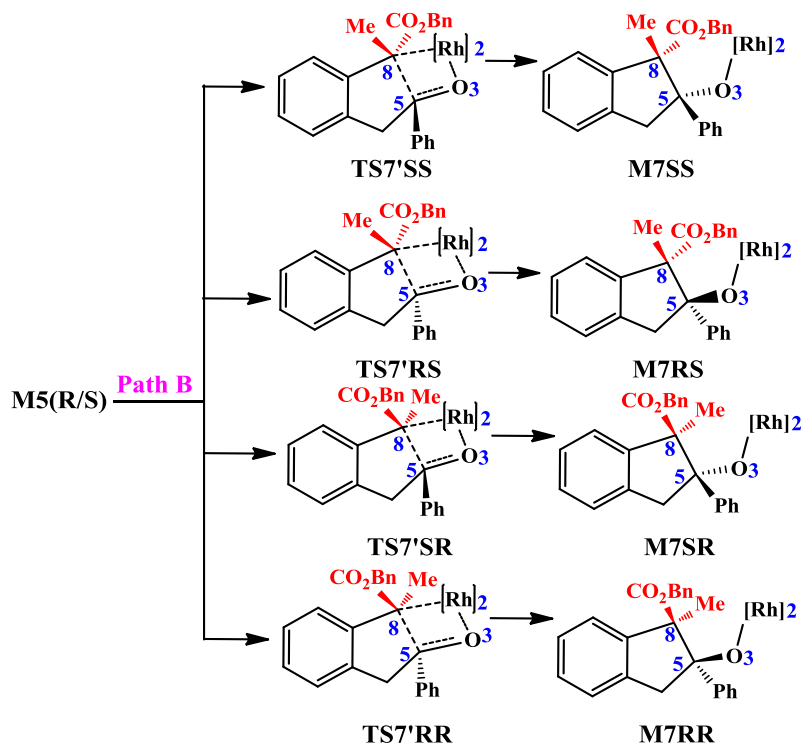

**Scheme S3** Possible reaction modes in Path B in the fourth stage

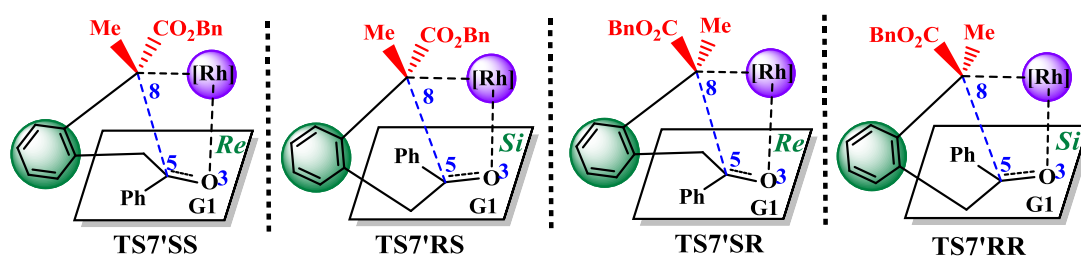

**Scheme S4** Different modes of Path B



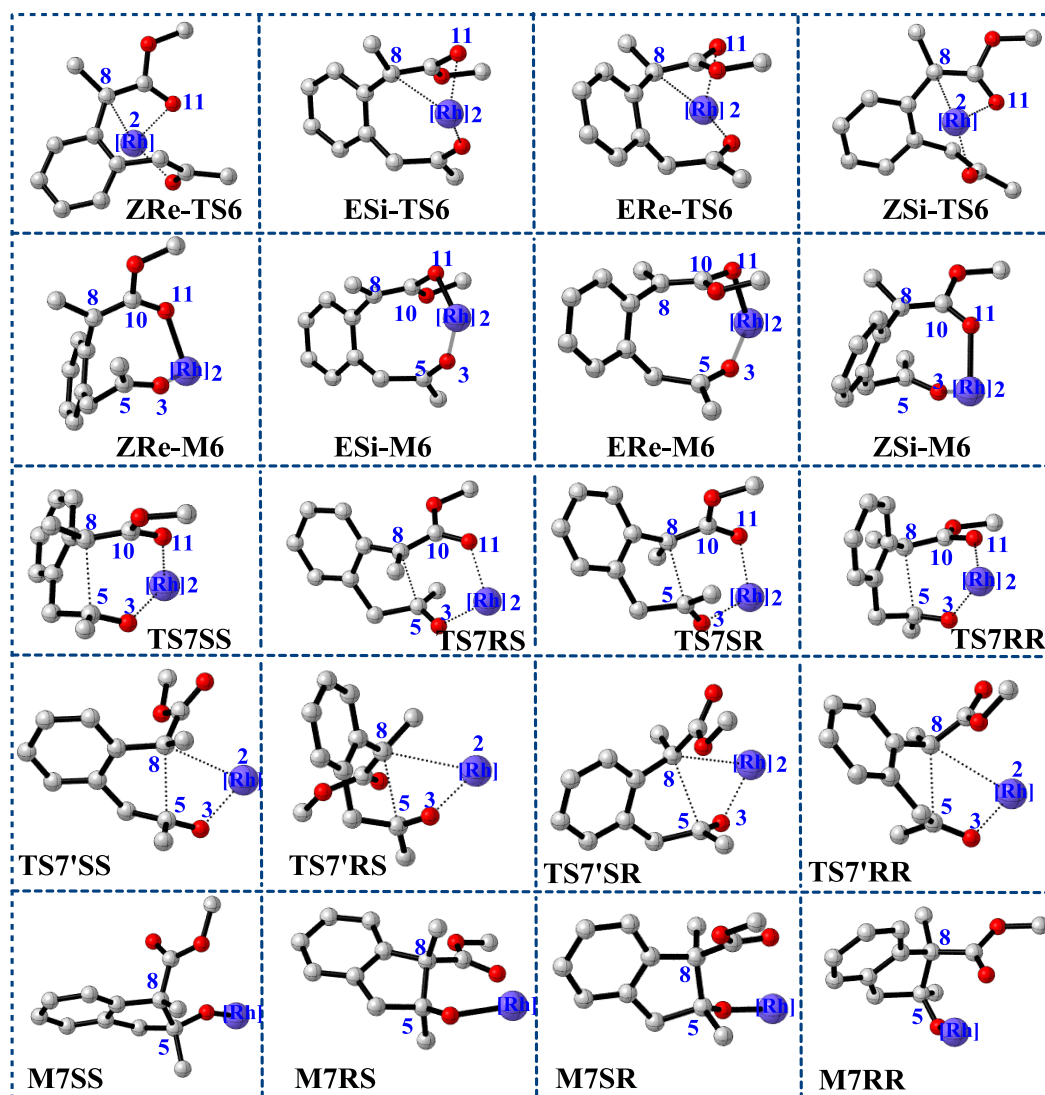

**Fig.S4** Optimized geometries of all stationary points involved in the fourth stage (For parameters of bond lengths, please see **Tables S2** and **S3**, the hydrogen atoms and the ligand of Rh(I) which are not involved in the reaction are omitted; only the  $\alpha$ -carbon of phenyl and benzyl group are shown).

**Table S3** Some Geometrical Parameters of Several Stationary Points (SP) Along the Reaction Coordinate for the Path A in the Fourth Stage (distances in Å)

| SP             | Rh2–O11 | Rh2–C8 | C10–C8 | C8–C5 | C5–O3 | O3–Rh2 |
|----------------|---------|--------|--------|-------|-------|--------|
| <b>ERe-TS6</b> | 2.44    | 2.84   | --     | --    | --    | 2.31   |
| <b>ESi-TS6</b> | 2.40    | 2.91   | --     | --    | --    | 2.16   |
| <b>ZRe-TS6</b> | 2.40    | 2.91   | --     | --    | --    | 2.16   |
| <b>ZSi-TS6</b> | 2.43    | 2.84   | --     | --    | --    | 2.31   |
| <b>ERe-M6</b>  | 2.11    | 3.60   | 1.38   | 2.79  | 1.25  | 2.17   |
| <b>ESi-M6</b>  | 2.15    | 3.55   | 1.39   | 2.59  | 1.27  | 2.21   |
| <b>ZRe-M6</b>  | 2.15    | 3.55   | 1.39   | 2.58  | 1.27  | 2.20   |
| <b>ZSi-M6</b>  | 2.14    | 3.60   | 1.39   | 2.72  | 1.25  | 2.16   |
| <b>TS7SS</b>   | 2.15    | --     | 1.42   | 2.32  | 1.28  | 2.12   |
| <b>TS7RS</b>   | 2.17    | --     | 1.41   | 2.37  | 1.28  | 2.18   |
| <b>TS7SR</b>   | 2.17    | --     | 1.41   | 2.37  | 1.28  | 2.18   |
| <b>TS7RR</b>   | 2.16    | --     | 1.42   | 2.32  | 1.29  | 2.12   |

**Table S4** Some geometrical parameters of several stationary points (SP) along the reaction coordinate for the Path B in the fourth stage (distances in Å)

| SP            | Rh2–C8 | C8–C5 | C5–O3 | O3–Rh2 |
|---------------|--------|-------|-------|--------|
| <b>TS7'SS</b> | 3.05   | 2.45  | 1.29  | 2.05   |
| <b>TS7'RS</b> | 3.25   | 2.66  | 1.28  | 2.06   |
| <b>TS7'SR</b> | 3.01   | 2.61  | 1.28  | 2.09   |
| <b>TS7'RR</b> | 3.06   | 2.46  | 1.29  | 2.06   |
| <b>M7RS</b>   | --     | 1.63  | 1.39  | 1.98   |
| <b>M7RR</b>   | --     | 1.63  | 1.39  | 2.02   |
| <b>M7SS</b>   | --     | 1.64  | 1.38  | 1.99   |
| <b>M7SR</b>   | --     | 1.65  | 1.38  | 2.05   |

## 6. Additional Description for the Fifth Stage

The **R1**-assisted protonation process (Channel B, **Scheme 9** in the main text) is also taken into consideration due to the existence of free hydroxyl group in the reactant. Similar with the H<sub>2</sub>O-assisted the protonation channel, the **R1**-assisted protonation process for the formation of **M2** and product **PRR** via the transition state **TS8'bRR** is also a concerted process on the basis of distance change analyses (**Fig.S5**).

Additionally, we have also investigated the possible trimolecular protonation mechanism (**Scheme 9** in the main text), namely, two molecules (**R1** and H<sub>2</sub>O) react with **M7RR** to accomplish the catalytic cycle via the transition state **TS8'cRR** and **TS8dRR**. The trimolecular protonation process for the formation of final products associated with Channels C and D is proceeded via the transition states **TS8'cRR** (Channel C) and **TS8dRR** (Channel D), respectively.

The free energy barriers of the four RR-configurational channels (Channels A, B, C, and D) are 6.3 kcal/mol (**TS8aRR**), 20.9 kcal/mol (**TS8'bRR**), 23.8 kcal/mol (**TS8'cRR**), and 21.5 kcal/mol (**TS8dRR**), respectively. Obviously, the Channel A is the most energy favorable channel.

The free energy barriers of the four RR-configurational channels (Channels A, B, C, and D) are 6.3 kcal/mol (**TS8aRR**), 20.9 kcal/mol (**TS8'bRR**), 23.8 kcal/mol (**TS8'cRR**), and 21.5 kcal/mol (**TS8dRR**), respectively. Obviously, the Channel A is the most energy favorable channel. For the RR-configurational isomer pathway, the energy barrier of this stage (6.3 kcal/mol) is lower than that of the fourth stage in Path A (7.6 kcal/mol). The optimized structures of the transition states involved in this stage (**Fig.S5**) show that the less steric-hinder in **TS8a** leads to the lowest free energy barrier. Besides, the stronger acidity of H<sub>2</sub>O than the alcohol **R1** is also the controlling factor.

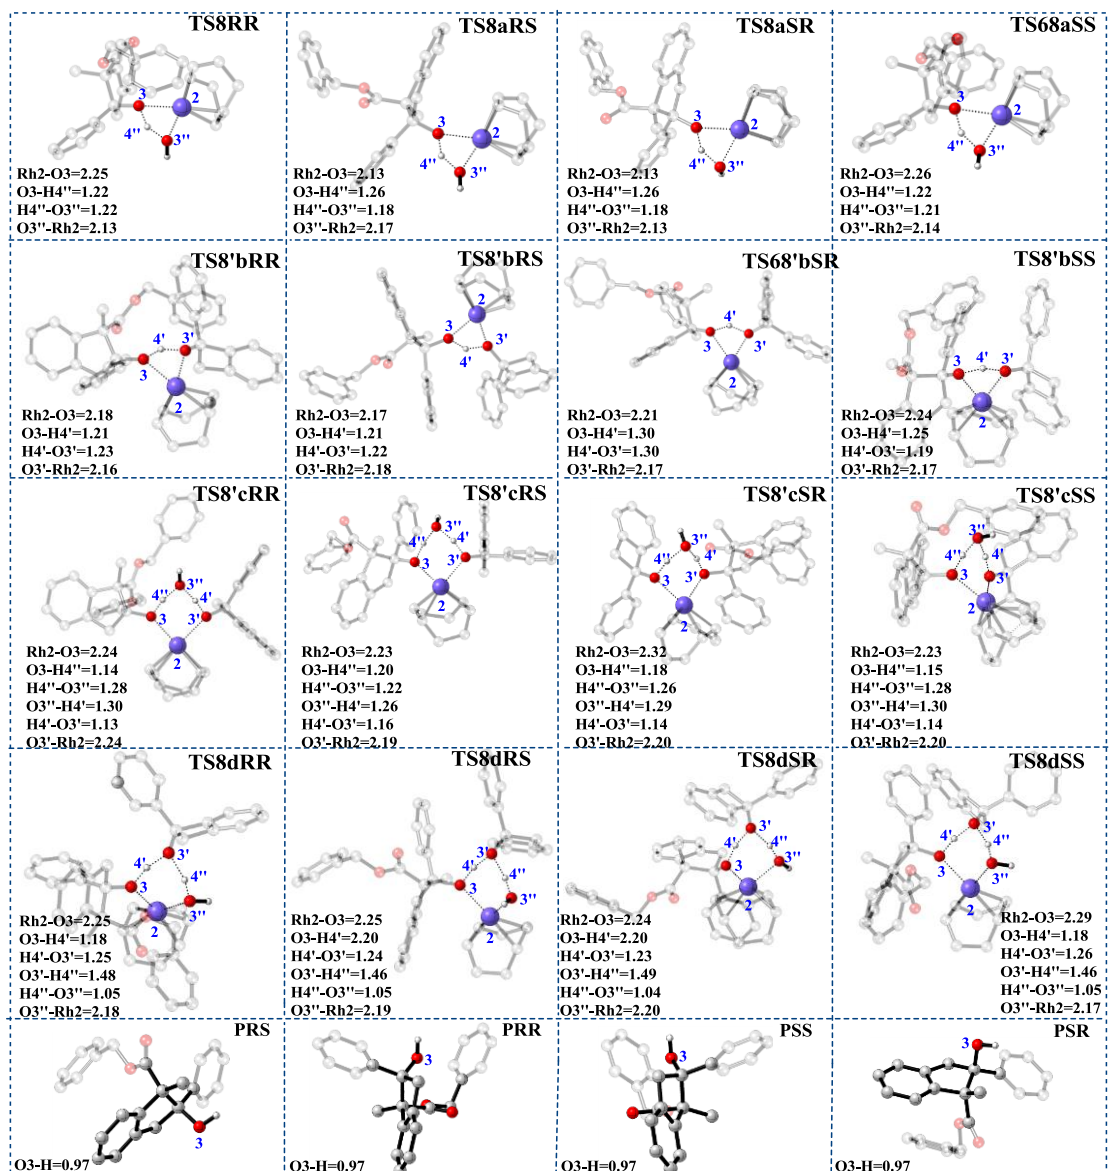

**Fig.S5** Optimized geometries of all stationary points involved in the fifth stage (the hydrogen atoms which are not involved in the reaction are omitted; the ligand of **Cat** and some atoms which are not involved in the reaction are shown in transparent; distances in Å)

## 7. Solvent Effect Analysis

**Table S4** Solvent Effect Analysis (Unit: kcal/mol)

| Solvent | Re_TS4 | Si_TS4 | $\Delta\Delta G^\ddagger$ |
|---------|--------|--------|---------------------------|
| toluene | 24.7   | 20.8   | 3.9                       |
| DMSO    | 32.2   | 28.9   | 3.3                       |

## 8. Cartesian Coordinates of All the Optimized Structures Obtained at the B3LYP/6-31G(d)//LanL2DZ Level in the Solvent Toluene Using CPCM Model

### Cat

|    |             |             |             |
|----|-------------|-------------|-------------|
| C  | 1.04127300  | 0.13823600  | -1.41113200 |
| C  | 0.94919800  | -1.18400800 | -0.95209300 |
| C  | -0.03228600 | 1.24243700  | 0.95145100  |
| C  | 1.62281400  | -1.74001800 | 0.29369500  |
| C  | 0.11204200  | -0.07005100 | 1.50444100  |
| C  | 1.43083300  | -0.84309000 | 1.54027200  |
| H  | 0.78064600  | 0.32079600  | -2.45411600 |
| H  | 0.64205700  | -1.93915400 | -1.67912500 |
| H  | 1.17980900  | -2.72239000 | 0.49409200  |
| H  | -0.60388300 | -0.34474400 | 2.27964600  |
| H  | -0.84118000 | 1.85066700  | 1.35912200  |
| H  | 2.69467400  | -1.91885700 | 0.11464100  |
| H  | 1.45599600  | -1.46733000 | 2.44009500  |
| H  | 2.26363900  | -0.13735800 | 1.63857100  |
| C  | 1.88417600  | 1.21737900  | -0.73707800 |
| H  | 2.29572500  | 1.88724900  | -1.50044900 |
| H  | 2.74775100  | 0.75785800  | -0.24383700 |
| C  | 1.06479000  | 2.04721700  | 0.27923200  |
| H  | 1.72701800  | 2.49964400  | 1.03496900  |
| H  | 0.58320400  | 2.88291300  | -0.24197400 |
| Rh | -0.86571500 | -0.16114600 | -0.34803400 |
| O  | -2.70206000 | 0.04903400  | 0.29836900  |
| H  | -2.78882200 | 0.34140000  | 1.22022500  |

**H2O**

|   |            |             |             |
|---|------------|-------------|-------------|
| O | 0.00000000 | 0.00000000  | 0.12025100  |
| H | 0.00000000 | 0.76009800  | -0.48100500 |
| H | 0.00000000 | -0.76009800 | -0.48100500 |

**N<sub>2</sub>**

|   |            |            |             |
|---|------------|------------|-------------|
| N | 0.00000000 | 0.00000000 | 0.55268300  |
| N | 0.00000000 | 0.00000000 | -0.55268300 |

**R1**

|   |             |             |             |
|---|-------------|-------------|-------------|
| C | -3.08353100 | -0.25315700 | 1.12878100  |
| C | -1.84377500 | 0.31173200  | 0.85602600  |
| C | -1.25052800 | 0.21517600  | -0.40107600 |
| C | -1.85509000 | -0.43435200 | -1.47037400 |
| C | -3.11378900 | -0.99762400 | -1.21024100 |
| C | -3.71006700 | -0.91108700 | 0.05827100  |
| H | -3.56127000 | -0.19555500 | 2.10339100  |
| H | -1.39639100 | -0.51282600 | -2.45238700 |
| H | -3.64193400 | -1.51753000 | -2.00540500 |
| H | -4.68545100 | -1.36621000 | 0.21114600  |
| C | 0.00477100  | 0.99520100  | 0.02000600  |
| C | -0.69826600 | 1.11110800  | 1.45806200  |
| H | -0.92670300 | 2.14815600  | 1.73051000  |
| H | -0.15303600 | 0.64073300  | 2.28324000  |
| O | 0.20091000  | 2.23359000  | -0.64493700 |
| H | -0.66546900 | 2.66606500  | -0.70942600 |
| C | 1.32425700  | 0.24215900  | 0.00921100  |
| C | 2.51279000  | 0.87609500  | -0.37301600 |
| C | 1.37814700  | -1.10017500 | 0.41375300  |
| C | 3.72627600  | 0.18395200  | -0.34981300 |
| H | 2.48357900  | 1.91187900  | -0.69021900 |
| C | 2.58959900  | -1.79001800 | 0.43912900  |
| H | 0.46478200  | -1.61236100 | 0.70462100  |
| C | 3.77116400  | -1.14997300 | 0.05623800  |
| H | 4.63831100  | 0.69250200  | -0.65200900 |
| H | 2.60907600  | -2.83019800 | 0.75388300  |
| H | 4.71548000  | -1.68758300 | 0.07241000  |

**R2**

|   |             |            |            |
|---|-------------|------------|------------|
| C | -2.92701500 | 0.30266100 | 0.00001200 |
|---|-------------|------------|------------|

|   |             |             |             |
|---|-------------|-------------|-------------|
| N | -2.49307000 | 1.53719200  | -0.00087100 |
| N | -2.13949500 | 2.62097900  | -0.00189600 |
| C | -4.41132600 | 0.03681600  | 0.00018400  |
| H | -4.90566500 | 0.44626300  | -0.88803000 |
| H | -4.53836500 | -1.04774800 | -0.00081700 |
| H | -4.90519800 | 0.44450900  | 0.88948100  |
| C | -1.93682400 | -0.77197400 | 0.00033300  |
| O | -2.22863400 | -1.95711200 | 0.00097900  |
| O | -0.66582400 | -0.30254600 | -0.00009200 |
| C | 0.37655100  | -1.31735800 | 0.00023500  |
| H | 0.24817200  | -1.94628800 | -0.88513900 |
| H | 0.24799200  | -1.94584600 | 0.88589700  |
| C | 1.70634200  | -0.61414200 | 0.00018100  |
| C | 2.33151400  | -0.27639000 | -1.20674900 |
| C | 2.33002900  | -0.27352500 | 1.20709200  |
| C | 3.55779300  | 0.38968000  | -1.20872900 |
| H | 1.85540300  | -0.53928300 | -2.14845500 |
| C | 3.55627800  | 0.39256800  | 1.20901300  |
| H | 1.85275300  | -0.53420100 | 2.14882500  |
| C | 4.17219900  | 0.72505300  | 0.00012000  |
| H | 4.03455900  | 0.64336600  | -2.15159800 |
| H | 4.03187400  | 0.64850800  | 2.15186300  |
| H | 5.12884900  | 1.24045400  | 0.00010200  |

## M1

|   |            |             |             |
|---|------------|-------------|-------------|
| C | 1.45463600 | 0.33460200  | 1.37751400  |
| C | 1.79977700 | 1.29997200  | 0.40899200  |
| C | 3.05379000 | -1.67326600 | 0.21726400  |
| C | 3.20428400 | 1.78294900  | 0.09693800  |
| C | 3.58869500 | -0.63944900 | -0.57286300 |
| C | 4.22753300 | 0.63028100  | -0.01825500 |
| H | 0.42532100 | 0.35153700  | 1.72869000  |
| H | 1.00952800 | 1.97990400  | 0.09534500  |
| H | 3.16130400 | 2.31992900  | -0.85794900 |
| H | 3.87575500 | -0.89892600 | -1.59207900 |
| H | 2.98061200 | -2.65860000 | -0.24449400 |
| H | 3.53140700 | 2.52028200  | 0.84717100  |
| H | 5.04727900 | 0.93896200  | -0.67663100 |
| H | 4.68581100 | 0.42338800  | 0.95464900  |
| C | 2.44968800 | -0.34863300 | 2.31386700  |
| H | 1.95985200 | -0.54259100 | 3.27460600  |
| H | 3.27974700 | 0.33193800  | 2.53131000  |
| C | 2.97478800 | -1.68159200 | 1.73351300  |

|    |             |             |             |
|----|-------------|-------------|-------------|
| H  | 3.95203700  | -1.93549300 | 2.17351400  |
| H  | 2.29182500  | -2.48936600 | 2.02121200  |
| Rh | 1.41454500  | -0.54579000 | -0.58225100 |
| O  | 0.96257300  | -1.97021000 | -2.26318100 |
| H  | 1.36546100  | -1.64009200 | -3.08389700 |
| C  | -4.46992000 | -2.04041200 | -0.28234400 |
| C  | -3.45370800 | -1.14878200 | -0.60157000 |
| C  | -2.37616200 | -0.91364300 | 0.25036600  |
| C  | -2.23048000 | -1.58492700 | 1.45963900  |
| C  | -3.24651300 | -2.49678900 | 1.79179300  |
| C  | -4.34302100 | -2.71412500 | 0.94391700  |
| H  | -5.31911100 | -2.22934800 | -0.93469800 |
| H  | -1.38632000 | -1.43064100 | 2.12739500  |
| H  | -3.18662100 | -3.04713400 | 2.72764800  |
| H  | -5.10662700 | -3.42819400 | 1.24271300  |
| C  | -1.73150000 | 0.12572900  | -0.69525500 |
| C  | -2.96125800 | -0.19944500 | -1.67784200 |
| H  | -2.62302600 | -0.68088400 | -2.60161600 |
| H  | -3.61268500 | 0.64611100  | -1.92811500 |
| O  | -0.50884200 | -0.21407400 | -1.26454700 |
| H  | 0.06393700  | -1.52697900 | -2.20200400 |
| C  | -1.75057500 | 1.57540800  | -0.21175800 |
| C  | -1.85971300 | 1.92575700  | 1.13909100  |
| C  | -1.63362000 | 2.60427300  | -1.16059300 |
| C  | -1.84599000 | 3.26756600  | 1.53678800  |
| H  | -1.96840800 | 1.14740600  | 1.88808300  |
| C  | -1.62160500 | 3.94281500  | -0.76995900 |
| H  | -1.54551400 | 2.34691800  | -2.21283800 |
| C  | -1.72609400 | 4.28041900  | 0.58468600  |
| H  | -1.93220300 | 3.51756200  | 2.59071400  |
| H  | -1.53385700 | 4.72428300  | -1.51991200 |
| H  | -1.71806600 | 5.32260000  | 0.89075900  |

## M2

|   |             |             |             |
|---|-------------|-------------|-------------|
| C | -2.88264100 | 0.79900700  | 0.10401400  |
| C | -2.60421200 | 0.30212400  | 1.38644700  |
| C | -2.12011400 | -1.59086500 | -1.20382800 |
| C | -3.21906700 | -0.93658500 | 2.01720300  |
| C | -2.07149200 | -2.16122500 | 0.09067600  |
| C | -3.24416000 | -2.15868000 | 1.06841100  |
| H | -2.61813400 | 1.83889800  | -0.08763000 |
| H | -2.17816500 | 1.00342200  | 2.10340700  |
| H | -2.61590000 | -1.18728500 | 2.89798000  |



|    |             |             |             |
|----|-------------|-------------|-------------|
| H  | -1.31957700 | -2.93191200 | 0.25277800  |
| H  | -1.40404400 | -1.97342800 | -1.92962100 |
| H  | -4.23252900 | -0.72337900 | 2.39226400  |
| H  | -3.21382900 | -3.07724400 | 1.66485600  |
| H  | -4.18726800 | -2.19111200 | 0.51176500  |
| C  | -3.91823700 | 0.19271400  | -0.84007500 |
| H  | -4.38560100 | 0.99271800  | -1.42531000 |
| H  | -4.72572800 | -0.26453700 | -0.25832400 |
| C  | -3.29751700 | -0.84460100 | -1.80599900 |
| H  | -4.06490100 | -1.55335200 | -2.15587600 |
| H  | -2.93089200 | -0.32692700 | -2.70002000 |
| Rh | -1.00379800 | -0.30585600 | 0.05954100  |
| C  | 0.43045600  | 3.21760700  | -1.18033700 |
| C  | 0.89622800  | 1.91341500  | -1.12057400 |
| C  | 0.94095900  | 1.19718600  | 0.08755500  |
| C  | 0.50975300  | 1.75244600  | 1.29779600  |
| C  | 0.01136100  | 3.06867500  | 1.23596900  |
| C  | -0.02496300 | 3.77778700  | 0.02933500  |
| H  | 0.41872800  | 3.79974500  | -2.09805500 |
| H  | 0.58175500  | 1.22938000  | 2.24749400  |
| H  | -0.33792800 | 3.55077400  | 2.14507400  |
| H  | -0.40512300 | 4.79622100  | 0.03154000  |
| C  | 1.60457600  | -0.05224600 | -0.57969900 |
| C  | 1.57609700  | 0.82464700  | -1.93009100 |
| H  | 0.98194100  | 0.36078400  | -2.72351000 |
| H  | 2.56000300  | 1.10200300  | -2.32536200 |
| O  | 0.73091000  | -1.12915900 | -0.58241600 |
| C  | 2.99460000  | -0.46520200 | -0.12550900 |
| C  | 3.70177800  | -1.40340200 | -0.89525700 |
| C  | 3.59313300  | 0.03507000  | 1.03859000  |
| C  | 4.97454000  | -1.82799900 | -0.51212100 |
| H  | 3.24785600  | -1.80311100 | -1.79549700 |
| C  | 4.86949500  | -0.38865400 | 1.42479700  |
| H  | 3.06681300  | 0.76122500  | 1.64548700  |
| C  | 5.56388100  | -1.32030000 | 0.65076600  |
| H  | 5.50684700  | -2.55233500 | -1.11865000 |
| H  | 5.31926600  | 0.00918700  | 2.32789800  |
| H  | 6.55331200  | -1.64845500 | 0.94886900  |

### M3

|   |             |             |             |
|---|-------------|-------------|-------------|
| C | -3.14805000 | -1.77174200 | -0.98012000 |
| C | -3.93791900 | -0.64777800 | -1.12447200 |
| C | -3.14433300 | -2.67165500 | 0.24534000  |

|    |             |             |             |
|----|-------------|-------------|-------------|
| C  | -4.89253300 | -0.07854700 | -0.08971500 |
| C  | -1.81015500 | -0.78806800 | 1.39487000  |
| C  | -2.80974200 | 0.23916300  | 1.39150600  |
| C  | -2.06300000 | -2.28074200 | 1.28592600  |
| C  | -4.31654400 | -0.02319500 | 1.34773400  |
| H  | -4.13431300 | -2.66209600 | 0.70836700  |
| H  | -2.96776300 | -3.70610700 | -0.07462300 |
| H  | -5.84023400 | -0.64235600 | -0.09064400 |
| H  | -5.14979300 | 0.93982800  | -0.40603400 |
| H  | -1.11550500 | -2.75425000 | 1.01252500  |
| H  | -2.33553800 | -2.69210200 | 2.27415900  |
| H  | -4.83081900 | 0.77028900  | 1.89613300  |
| H  | -4.54342800 | -0.95424600 | 1.88386300  |
| H  | -2.52627200 | 1.17355800  | 1.87514700  |
| H  | -4.04844900 | -0.24337400 | -2.13238500 |
| H  | -0.87262800 | -0.53907700 | 1.89089100  |
| H  | -2.66184900 | -2.16333000 | -1.87321300 |
| Rh | -1.89080700 | 0.12652800  | -0.49165800 |
| C  | 0.95588200  | 1.15701100  | -0.25930000 |
| C  | -0.41841900 | 1.45184700  | -0.04038600 |
| C  | -0.75308700 | 2.76502300  | 0.33709800  |
| C  | 0.21476200  | 3.77303300  | 0.45306100  |
| C  | 1.55163600  | 3.47055400  | 0.21771800  |
| C  | 1.91657900  | 2.16486500  | -0.13355600 |
| C  | 1.34565000  | -0.27840100 | -0.63122200 |
| C  | 2.74067100  | -0.46467200 | -1.22247000 |
| H  | -1.79410300 | 3.01868300  | 0.53046300  |
| H  | -0.08183900 | 4.78302000  | 0.73205600  |
| H  | 2.31829200  | 4.23892000  | 0.30520000  |
| H  | 2.96654000  | 1.94499800  | -0.31124100 |
| H  | 1.22219700  | -0.93183000 | 0.24511000  |
| H  | 0.65294900  | -0.65125000 | -1.39715500 |
| O  | 2.89174800  | -0.45818900 | -2.44029500 |
| C  | 3.91755900  | -0.68132400 | -0.31709000 |
| C  | 5.16226500  | -0.97463400 | -0.90018800 |
| C  | 3.82196700  | -0.60080700 | 1.08202000  |
| C  | 6.28260100  | -1.19154400 | -0.10625200 |
| H  | 5.22190600  | -1.03020200 | -1.98513600 |
| C  | 4.94747800  | -0.81154800 | 1.87992300  |
| H  | 2.87329100  | -0.35506900 | 1.55588900  |
| C  | 6.17669100  | -1.11088300 | 1.28665300  |
| H  | 7.23939900  | -1.42223700 | -0.56540900 |
| H  | 4.86739000  | -0.74414900 | 2.96104800  |
| H  | 7.05315300  | -1.28162100 | 1.90949600  |

## Re\_M4

|    |             |             |             |
|----|-------------|-------------|-------------|
| C  | 2.80135400  | -2.05144800 | -1.68930200 |
| C  | 3.23660300  | -2.72515400 | -0.55635000 |
| C  | 3.59652300  | -1.00474600 | -2.45431000 |
| C  | 4.53553400  | -2.51378600 | 0.19346700  |
| C  | 3.18887000  | 0.60852000  | -0.49085900 |
| C  | 3.87644100  | -0.05048900 | 0.49441500  |
| C  | 3.33974600  | 0.44712000  | -1.98683400 |
| C  | 5.00571400  | -1.04324500 | 0.28153800  |
| H  | 4.66455700  | -1.23657900 | -2.39823400 |
| H  | 3.33019100  | -1.07544800 | -3.51498200 |
| H  | 5.33085100  | -3.12865500 | -0.25737000 |
| H  | 4.39673700  | -2.90343200 | 1.20904700  |
| H  | 2.41733100  | 0.81104200  | -2.45390800 |
| H  | 4.14404400  | 1.10225500  | -2.35709100 |
| H  | 5.70823600  | -0.95518400 | 1.11821200  |
| H  | 5.57234200  | -0.77305300 | -0.61427500 |
| H  | 3.73029300  | 0.29717400  | 1.51385400  |
| H  | 2.74172800  | -3.66656700 | -0.32256800 |
| H  | 2.58320900  | 1.45591900  | -0.18018000 |
| H  | 1.94725700  | -2.47380000 | -2.21172300 |
| Rh | 1.73806600  | -1.16894500 | 0.17790500  |
| C  | -0.09524600 | 1.13037700  | 1.29389600  |
| C  | 0.87809600  | 0.14358000  | 1.57750900  |
| C  | 1.30777500  | 0.01690200  | 2.90978500  |
| C  | 0.81021000  | 0.83058000  | 3.93504000  |
| C  | -0.15231700 | 1.79447600  | 3.64180300  |
| C  | -0.60125600 | 1.93452700  | 2.32699300  |
| C  | -0.64111700 | 1.26441900  | -0.12669300 |
| C  | -1.46976500 | 2.50628700  | -0.43389900 |
| H  | 2.04986800  | -0.73791100 | 3.16446000  |
| H  | 1.17037800  | 0.70381400  | 4.95378000  |
| H  | -0.55674500 | 2.43102700  | 4.42467000  |
| H  | -1.36423500 | 2.67844200  | 2.10918300  |
| H  | 0.19129800  | 1.20223200  | -0.83864900 |
| H  | -1.29196800 | 0.40958200  | -0.33309200 |
| O  | -2.68531800 | 2.41237700  | -0.58135100 |
| C  | -0.79988800 | 3.83633200  | -0.60278500 |
| C  | -1.57971100 | 4.92577200  | -1.02660000 |
| C  | 0.56942400  | 4.03107800  | -0.36308600 |
| C  | -1.00270300 | 6.17840100  | -1.21501700 |
| H  | -2.63730200 | 4.76370900  | -1.20669300 |

|   |             |             |             |
|---|-------------|-------------|-------------|
| C | 1.14719000  | 5.28736500  | -0.54724300 |
| H | 1.18146500  | 3.20868100  | -0.00934600 |
| C | 0.36365300  | 6.36146500  | -0.97613000 |
| H | -1.61384900 | 7.01309900  | -1.54710800 |
| H | 2.20701000  | 5.42786700  | -0.35428600 |
| H | 0.81511300  | 7.33912900  | -1.12194500 |
| C | 0.29038700  | -2.36691200 | 0.23872200  |
| C | 0.08334500  | -3.43782300 | 1.26909100  |
| H | 0.85936500  | -3.45086900 | 2.03567800  |
| H | -0.88865000 | -3.25955600 | 1.75466300  |
| H | 0.01168800  | -4.43123400 | 0.79933300  |
| C | -0.70495800 | -2.40175200 | -0.87060000 |
| O | -0.44834300 | -2.75094600 | -2.01222700 |
| O | -1.93042500 | -2.03018900 | -0.44918400 |
| C | -2.98438900 | -1.99106400 | -1.46412700 |
| H | -2.95920800 | -2.92935100 | -2.02249000 |
| H | -2.75179000 | -1.17186000 | -2.15099000 |
| C | -4.29911400 | -1.78587400 | -0.76422000 |
| C | -5.15095400 | -2.87338400 | -0.53280000 |
| C | -4.68277800 | -0.50926000 | -0.32754700 |
| C | -6.37009200 | -2.69370400 | 0.12376900  |
| H | -4.85934600 | -3.86483800 | -0.87195800 |
| C | -5.89959700 | -0.33089500 | 0.33246200  |
| H | -4.03056500 | 0.34466400  | -0.49847600 |
| C | -6.74553700 | -1.42060200 | 0.55823300  |
| H | -7.02453700 | -3.54445000 | 0.29342400  |
| H | -6.18926300 | 0.66153800  | 0.66715700  |
| H | -7.69442100 | -1.27717100 | 1.06832300  |

### Si\_M4

|   |             |             |             |
|---|-------------|-------------|-------------|
| C | -3.83952600 | -1.04282300 | -1.41925700 |
| C | -4.14532500 | 0.11263900  | -0.71440100 |
| C | -4.30432500 | -2.45008700 | -1.07497000 |
| C | -4.94729400 | 0.21762400  | 0.56595200  |
| C | -2.70269100 | -2.39117300 | 0.94470700  |
| C | -3.28911700 | -1.39112400 | 1.67656000  |
| C | -3.33390000 | -3.22317300 | -0.15090300 |
| C | -4.73327900 | -0.93614900 | 1.57326400  |
| H | -5.30288200 | -2.41211100 | -0.62891300 |
| H | -4.41625600 | -3.01802200 | -2.00572500 |
| H | -6.01932300 | 0.30317200  | 0.32588600  |
| H | -4.67200100 | 1.16401300  | 1.04603200  |
| H | -2.52094500 | -3.63451700 | -0.76059400 |

|    |             |             |             |
|----|-------------|-------------|-------------|
| H  | -3.85231700 | -4.09113400 | 0.28659900  |
| H  | -5.06299600 | -0.59606000 | 2.56173500  |
| H  | -5.37468200 | -1.78509200 | 1.31968600  |
| H  | -2.72470000 | -1.00146200 | 2.51993800  |
| H  | -4.00798300 | 1.06089900  | -1.22970700 |
| H  | -1.73608100 | -2.75065700 | 1.29055800  |
| H  | -3.46749000 | -0.91194500 | -2.43313300 |
| Rh | -2.00201800 | -0.39821600 | -0.13858100 |
| C  | 0.79980700  | -1.17301700 | 1.06887200  |
| C  | -0.33502100 | -0.33561500 | 1.13832000  |
| C  | -0.39907500 | 0.57878800  | 2.20860100  |
| C  | 0.60331900  | 0.66680800  | 3.17966500  |
| C  | 1.71366600  | -0.17601400 | 3.10244300  |
| C  | 1.80260100  | -1.08753300 | 2.05188400  |
| C  | 0.96062000  | -2.19442100 | -0.05713600 |
| C  | 2.24904900  | -1.98751600 | -0.85542300 |
| H  | -1.25783700 | 1.24247000  | 2.29127800  |
| H  | 0.51290500  | 1.38484200  | 3.99222600  |
| H  | 2.50141200  | -0.12644000 | 3.84998500  |
| H  | 2.66930700  | -1.74263600 | 1.99267100  |
| H  | 0.89887200  | -3.21440900 | 0.33690300  |
| H  | 0.12904200  | -2.06662500 | -0.75719200 |
| O  | 2.31603400  | -1.07850800 | -1.67761100 |
| C  | 3.43955700  | -2.87623900 | -0.64216700 |
| C  | 4.58965100  | -2.62347900 | -1.41226900 |
| C  | 3.46197000  | -3.93789000 | 0.27766900  |
| C  | 5.72844500  | -3.40897800 | -1.26847200 |
| H  | 4.56390500  | -1.80079100 | -2.11874500 |
| C  | 4.60594100  | -4.72460600 | 0.42379700  |
| H  | 2.59432400  | -4.15686000 | 0.89037200  |
| C  | 5.73924400  | -4.46334100 | -0.34829300 |
| H  | 6.60932500  | -3.20221200 | -1.86991200 |
| H  | 4.60994600  | -5.54124900 | 1.14010800  |
| H  | 6.62832900  | -5.07759800 | -0.23440900 |
| C  | -1.18196300 | 0.70856400  | -1.42210900 |
| C  | -0.51714500 | 0.26518800  | -2.68621000 |
| H  | -0.88489600 | -0.70823500 | -3.02299400 |
| H  | -0.59278100 | 0.99832800  | -3.50056300 |
| H  | 0.55120400  | 0.12298500  | -2.44903400 |
| C  | -1.26494600 | 2.18307500  | -1.23997300 |
| O  | -2.28139900 | 2.82989600  | -1.44350400 |
| O  | -0.09383200 | 2.71402400  | -0.84967700 |
| C  | -0.09841900 | 4.14557200  | -0.58051200 |
| H  | -0.83525000 | 4.33312400  | 0.20778000  |

|   |             |            |             |
|---|-------------|------------|-------------|
| H | -0.42377100 | 4.67526000 | -1.47956600 |
| C | 1.28877500  | 4.55508200 | -0.16449000 |
| C | 1.90168800  | 3.96714400 | 0.95199000  |
| C | 1.97435000  | 5.54691000 | -0.87444900 |
| C | 3.17847200  | 4.36593100 | 1.34562800  |
| H | 1.38144900  | 3.18890900 | 1.50457900  |
| C | 3.24954100  | 5.95503300 | -0.47418200 |
| H | 1.50855100  | 6.00347500 | -1.74462400 |
| C | 3.85439000  | 5.36370700 | 0.63576400  |
| H | 3.64619500  | 3.89969400 | 2.20857800  |
| H | 3.76954700  | 6.72829600 | -1.03318300 |
| H | 4.84790100  | 5.67569700 | 0.94647800  |

## M5R

|    |             |             |             |
|----|-------------|-------------|-------------|
| C  | -3.25265000 | -1.86152400 | -0.83472700 |
| C  | -3.59453300 | -1.77856100 | 0.53070400  |
| C  | -4.18506200 | -1.46778400 | -1.97782100 |
| C  | -4.88617000 | -1.22758000 | 1.10315400  |
| C  | -3.66574300 | 0.95488100  | -1.29392000 |
| C  | -4.23310000 | 0.97856400  | -0.02653600 |
| C  | -4.01667500 | 0.00510500  | -2.42421200 |
| C  | -5.37307100 | 0.07817800  | 0.42713900  |
| H  | -5.22414400 | -1.65901000 | -1.68768300 |
| H  | -3.98885200 | -2.11867300 | -2.83731300 |
| H  | -5.68186500 | -1.98890800 | 1.06047600  |
| H  | -4.71151000 | -1.03193500 | 2.16817300  |
| H  | -3.20621000 | 0.06046900  | -3.16053000 |
| H  | -4.92456200 | 0.34547800  | -2.94716300 |
| H  | -6.00071400 | 0.62928300  | 1.13673500  |
| H  | -6.01807600 | -0.15553700 | -0.42628100 |
| H  | -4.04700500 | 1.85948800  | 0.58588800  |
| H  | -3.06535300 | -2.44335900 | 1.20925900  |
| H  | -3.10104200 | 1.83610600  | -1.59827600 |
| H  | -2.45017900 | -2.55076000 | -1.09270800 |
| Rh | -2.26675300 | -0.15179100 | 0.05826400  |
| C  | -0.44814400 | 1.50570500  | 0.31864700  |
| C  | -0.36931400 | 0.44705200  | 1.30525200  |
| C  | -0.48968000 | 0.83562200  | 2.67469800  |
| C  | -0.67790600 | 2.14681700  | 3.06803000  |
| C  | -0.80410300 | 3.16158100  | 2.10340000  |
| C  | -0.68595800 | 2.83305400  | 0.76709900  |
| C  | -0.09232400 | 1.37243900  | -1.15586000 |
| C  | 1.33299900  | 1.67802400  | -1.66990800 |

|   |             |             |             |
|---|-------------|-------------|-------------|
| H | -0.40691100 | 0.06926600  | 3.43654200  |
| H | -0.73782200 | 2.38728700  | 4.12619800  |
| H | -0.97493200 | 4.19151700  | 2.40288600  |
| H | -0.74124000 | 3.61951400  | 0.01794600  |
| H | -0.70698200 | 2.09380200  | -1.71118600 |
| H | -0.34309900 | 0.39683700  | -1.58046200 |
| O | 1.55994600  | 1.39227000  | -2.83888900 |
| C | 2.37500300  | 2.41454800  | -0.88122000 |
| C | 3.20118000  | 3.29623200  | -1.60227500 |
| C | 2.60397600  | 2.23840600  | 0.49309700  |
| C | 4.20916900  | 4.01088000  | -0.96079800 |
| H | 3.03386700  | 3.41268300  | -2.66809900 |
| C | 3.63238300  | 2.93756500  | 1.12799800  |
| H | 2.01062400  | 1.53436200  | 1.06100300  |
| C | 4.42765900  | 3.83188500  | 0.40878400  |
| H | 4.82822800  | 4.70121900  | -1.52710800 |
| H | 3.81015700  | 2.78146600  | 2.18836800  |
| H | 5.21809400  | 4.38318400  | 0.91103400  |
| C | -0.46204400 | -0.98017900 | 0.93658800  |
| C | -0.65987500 | -1.99260600 | 2.07176300  |
| H | -1.48739600 | -1.71972500 | 2.73131400  |
| H | 0.24595800  | -2.09356000 | 2.68909600  |
| H | -0.87146400 | -2.97592900 | 1.64620100  |
| C | 0.42558600  | -1.60863900 | -0.09057100 |
| O | 0.22391100  | -2.71156200 | -0.57882300 |
| O | 1.54340700  | -0.88555700 | -0.37671500 |
| C | 2.49915700  | -1.48779600 | -1.30321600 |
| H | 1.95176000  | -2.13234800 | -1.99157500 |
| H | 2.91801400  | -0.64161300 | -1.84859800 |
| C | 3.56997600  | -2.24891200 | -0.56197700 |
| C | 3.42080800  | -3.61646100 | -0.29016800 |
| C | 4.73035500  | -1.59278600 | -0.12897200 |
| C | 4.41432200  | -4.31326500 | 0.39981300  |
| H | 2.51948400  | -4.12589800 | -0.61775700 |
| C | 5.72431200  | -2.28766000 | 0.56244700  |
| H | 4.85459900  | -0.53253900 | -0.33708200 |
| C | 5.56799000  | -3.65060200 | 0.82727900  |
| H | 4.28954500  | -5.37398600 | 0.60102400  |
| H | 6.62085500  | -1.76766900 | 0.88949000  |
| H | 6.34279300  | -4.19421400 | 1.36148100  |

## M5S

|   |            |             |             |
|---|------------|-------------|-------------|
| C | 3.25244900 | -1.86139800 | -0.83499000 |
|---|------------|-------------|-------------|

|    |             |             |             |
|----|-------------|-------------|-------------|
| C  | 3.59443800  | -1.77862800 | 0.53042400  |
| C  | 4.18480900  | -1.46763400 | -1.97811000 |
| C  | 4.88622800  | -1.22791500 | 1.10282400  |
| C  | 3.66579900  | 0.95497000  | -1.29385500 |
| C  | 4.23327900  | 0.97847300  | -0.02651200 |
| C  | 4.01658700  | 0.00532400  | -2.42430100 |
| C  | 5.37318600  | 0.07790400  | 0.42698800  |
| H  | 5.22388800  | -1.65905300 | -1.68813200 |
| H  | 3.98838300  | -2.11836500 | -2.83767200 |
| H  | 5.68180700  | -1.98935700 | 1.05996800  |
| H  | 4.71171000  | -1.03237600 | 2.16788500  |
| H  | 3.20612000  | 0.06086400  | -3.16059900 |
| H  | 4.92450100  | 0.34565400  | -2.94723700 |
| H  | 6.00090500  | 0.62885500  | 1.13664200  |
| H  | 6.01811900  | -0.15573500 | -0.42649600 |
| H  | 4.04732000  | 1.85937500  | 0.58598500  |
| H  | 3.06529400  | -2.44349300 | 1.20893100  |
| H  | 3.10114900  | 1.83627900  | -1.59806800 |
| H  | 2.44988800  | -2.55053100 | -1.09298200 |
| Rh | 2.26679800  | -0.15170100 | 0.05832100  |
| C  | 0.44820900  | 1.50583400  | 0.31886500  |
| C  | 0.36938900  | 0.44704900  | 1.30534900  |
| C  | 0.48975700  | 0.83550900  | 2.67482800  |
| C  | 0.67806700  | 2.14666800  | 3.06828400  |
| C  | 0.80425700  | 3.16151600  | 2.10377000  |
| C  | 0.68605500  | 2.83312300  | 0.76742600  |
| C  | 0.09242500  | 1.37268900  | -1.15567700 |
| C  | -1.33290400 | 1.67809700  | -1.66982800 |
| H  | 0.40699200  | 0.06909400  | 3.43662000  |
| H  | 0.73795700  | 2.38705400  | 4.12647400  |
| H  | 0.97516700  | 4.19140900  | 2.40336200  |
| H  | 0.74131100  | 3.61965700  | 0.01835300  |
| H  | 0.70698900  | 2.09417600  | -1.71092200 |
| H  | 0.34334300  | 0.39715700  | -1.58035400 |
| O  | -1.55973300 | 1.39226700  | -2.83881800 |
| C  | -2.37506300 | 2.41452300  | -0.88124100 |
| C  | -3.20162700 | 3.29571000  | -1.60248600 |
| C  | -2.60387000 | 2.23867700  | 0.49314400  |
| C  | -4.20979800 | 4.01019600  | -0.96111600 |
| H  | -3.03445000 | 3.41188900  | -2.66836000 |
| C  | -3.63246800 | 2.93765400  | 1.12793700  |
| H  | -2.01030600 | 1.53492500  | 1.06118000  |
| C  | -4.42810800 | 3.83150500  | 0.40853300  |
| H  | -4.82917000 | 4.70013000  | -1.52757600 |



|   |             |             |             |
|---|-------------|-------------|-------------|
| H | -3.81011900 | 2.78176600  | 2.18835900  |
| H | -5.21867400 | 4.38269100  | 0.91069900  |
| C | 0.46215800  | -0.98015400 | 0.93653600  |
| C | 0.65999300  | -1.99267700 | 2.07161500  |
| H | 1.48743700  | -1.71979100 | 2.73125900  |
| H | -0.24587500 | -2.09376600 | 2.68887100  |
| H | 0.87172100  | -2.97594900 | 1.64599500  |
| C | -0.42557200 | -1.60846600 | -0.09062700 |
| O | -0.22393700 | -2.71133800 | -0.57900500 |
| O | -1.54340900 | -0.88535400 | -0.37657100 |
| C | -2.49925100 | -1.48749300 | -1.30305400 |
| H | -1.95190800 | -2.13188200 | -1.99161500 |
| H | -2.91825500 | -0.64124000 | -1.84821200 |
| C | -3.56994200 | -2.24879800 | -0.56183700 |
| C | -3.42067600 | -3.61635700 | -0.29013900 |
| C | -4.73042200 | -1.59282500 | -0.12885300 |
| C | -4.41413300 | -4.31328600 | 0.39979800  |
| H | -2.51930600 | -4.12569500 | -0.61776000 |
| C | -5.72432300 | -2.28782500 | 0.56252000  |
| H | -4.85481600 | -0.53259500 | -0.33696400 |
| C | -5.56786400 | -3.65076200 | 0.82730400  |
| H | -4.28926000 | -5.37400700 | 0.60094600  |
| H | -6.62092900 | -1.76793800 | 0.88955200  |
| H | -6.34261300 | -4.19447600 | 1.36147900  |

### **ERe-M6**

|   |            |             |             |
|---|------------|-------------|-------------|
| C | 3.56354200 | -1.71049800 | 0.11632000  |
| C | 3.38028100 | -1.30305300 | -1.21596000 |
| C | 4.76938700 | -1.33486300 | 0.97352500  |
| C | 4.29946200 | -0.39051900 | -2.00935900 |
| C | 3.59899300 | 0.93309800  | 1.11535400  |
| C | 3.67365800 | 1.33178100  | -0.23777800 |
| C | 4.51111600 | -0.06134700 | 1.81054600  |
| C | 4.74612100 | 0.85939800  | -1.21639200 |
| H | 5.65095000 | -1.20419900 | 0.33685700  |
| H | 5.00561400 | -2.16628300 | 1.64714800  |
| H | 5.17556700 | -0.94637000 | -2.37900300 |
| H | 3.74653700 | -0.06661800 | -2.89892000 |
| H | 4.02250100 | -0.34558800 | 2.74982200  |
| H | 5.46257500 | 0.41685300  | 2.09261600  |
| H | 4.97266200 | 1.66875500  | -1.91922500 |
| H | 5.67723000 | 0.65942200  | -0.67546000 |
| H | 3.17430200 | 2.26485500  | -0.49419500 |

|    |             |             |             |
|----|-------------|-------------|-------------|
| H  | 2.70699100  | -1.90594900 | -1.82520200 |
| H  | 3.06009100  | 1.60136600  | 1.78490400  |
| H  | 3.01102000  | -2.59170200 | 0.44097300  |
| Rh | 2.10049500  | -0.09455600 | 0.02398200  |
| C  | -2.07084300 | -1.68642900 | 1.86169600  |
| C  | -2.00749000 | -0.32586000 | 2.25021800  |
| C  | -3.12763200 | 0.24244000  | 2.87634200  |
| C  | -4.29077800 | -0.49296400 | 3.10617300  |
| C  | -4.34426500 | -1.83459200 | 2.72601000  |
| C  | -3.23666400 | -2.42202200 | 2.11306400  |
| C  | -0.84722000 | -2.36630900 | 1.24254900  |
| C  | -0.58034000 | -2.06465900 | -0.23071700 |
| H  | -3.07616600 | 1.28561900  | 3.17786500  |
| H  | -5.14692500 | -0.02384600 | 3.58442000  |
| H  | -5.23710600 | -2.42560200 | 2.91241500  |
| H  | -3.27919400 | -3.47524400 | 1.84680100  |
| H  | -0.95681800 | -3.45308000 | 1.34506500  |
| H  | 0.05789100  | -2.07553200 | 1.78153300  |
| O  | 0.41571500  | -1.42242500 | -0.58805000 |
| C  | -1.49538200 | -2.57053500 | -1.29089700 |
| C  | -1.42872400 | -1.98125300 | -2.56739900 |
| C  | -2.39407600 | -3.62853800 | -1.07703100 |
| C  | -2.25220700 | -2.42692300 | -3.59623200 |
| H  | -0.72957500 | -1.16886300 | -2.73063400 |
| C  | -3.20873400 | -4.08353800 | -2.11330300 |
| H  | -2.44867200 | -4.11699100 | -0.11201300 |
| C  | -3.14454500 | -3.48064800 | -3.37125300 |
| H  | -2.19991200 | -1.95631000 | -4.57379700 |
| H  | -3.89252800 | -4.90876500 | -1.93744600 |
| H  | -3.78550700 | -3.83169200 | -4.17520000 |
| C  | -0.74315400 | 0.43947000  | 2.07333900  |
| C  | 0.19982100  | 0.48415900  | 3.25174100  |
| H  | 0.61671900  | -0.50444900 | 3.51072800  |
| H  | -0.31656200 | 0.84192500  | 4.15438200  |
| H  | 1.03918000  | 1.15553600  | 3.05272300  |
| C  | -0.40026600 | 0.96192200  | 0.86394300  |
| O  | 0.77266400  | 1.45058200  | 0.53887700  |
| O  | -1.38109500 | 0.92669600  | -0.12521000 |
| C  | -1.16979800 | 1.69783900  | -1.31576000 |
| H  | -0.10748400 | 1.69163800  | -1.57294800 |
| H  | -1.72767800 | 1.17017900  | -2.09503600 |
| C  | -1.68103800 | 3.11852700  | -1.18808900 |
| C  | -0.94758100 | 4.08267100  | -0.47959400 |
| C  | -2.89790600 | 3.49202700  | -1.77173300 |

|   |             |            |             |
|---|-------------|------------|-------------|
| C | -1.42464000 | 5.38846500 | -0.35884400 |
| H | -0.00514900 | 3.79379500 | -0.02268700 |
| C | -3.37614600 | 4.79978700 | -1.65638200 |
| H | -3.47503500 | 2.75261400 | -2.32315100 |
| C | -2.63965700 | 5.75144700 | -0.94815900 |
| H | -0.84618800 | 6.12608100 | 0.19183100  |
| H | -4.32128100 | 5.07387600 | -2.11823000 |
| H | -3.00836600 | 6.76986800 | -0.85667900 |

## ESi-M6

|    |             |             |             |
|----|-------------|-------------|-------------|
| C  | -3.55990900 | -1.71387800 | 0.11610700  |
| C  | -3.37788400 | -1.30668000 | -1.21638200 |
| C  | -4.76600900 | -1.33947300 | 0.97349500  |
| C  | -4.29870400 | -0.39543000 | -2.00934500 |
| C  | -3.59856900 | 0.92993300  | 1.11460000  |
| C  | -3.67432800 | 1.32838200  | -0.23844000 |
| C  | -4.50926400 | -0.06547500 | 1.81021300  |
| C  | -4.74635700 | 0.85431900  | -1.21665500 |
| H  | -5.64777600 | -1.20994700 | 0.33683600  |
| H  | -5.00119900 | -2.17105700 | 1.64727800  |
| H  | -5.17447700 | -0.95237500 | -2.37814000 |
| H  | -3.74679800 | -0.07128600 | -2.89943800 |
| H  | -4.02030800 | -0.34878000 | 2.74958800  |
| H  | -5.46134700 | 0.41155800  | 2.09214300  |
| H  | -4.97393000 | 1.66313500  | -1.91978800 |
| H  | -5.67717000 | 0.65362300  | -0.67542300 |
| H  | -3.17611600 | 2.26198800  | -0.49515600 |
| H  | -2.70435000 | -1.90887600 | -1.82602600 |
| H  | -3.05999200 | 1.59882200  | 1.78375100  |
| H  | -3.00603700 | -2.59419200 | 0.44089300  |
| Rh | -2.09889600 | -0.09604500 | 0.02264600  |
| C  | 2.07032400  | -1.68519800 | 1.86132000  |
| C  | 2.00621500  | -0.32500100 | 2.25106500  |
| C  | 3.12574700  | 0.24308500  | 2.87842200  |
| C  | 4.28910800  | -0.49209100 | 3.10805100  |
| C  | 4.34340500  | -1.83325100 | 2.72642700  |
| C  | 3.23633000  | -2.42054600 | 2.11238000  |
| C  | 0.84707600  | -2.36491600 | 1.24122700  |
| C  | 0.58212200  | -2.06360500 | -0.23233800 |
| H  | 3.07379400  | 1.28592400  | 3.18099200  |
| H  | 5.14479400  | -0.02310300 | 3.58724800  |
| H  | 5.23643300  | -2.42403700 | 2.91253700  |
| H  | 3.27948600  | -3.47340900 | 1.84485100  |

|   |             |             |             |
|---|-------------|-------------|-------------|
| H | 0.95625500  | -3.45167900 | 1.34415200  |
| H | -0.05844100 | -2.07371100 | 1.77925300  |
| O | -0.41285400 | -1.42065300 | -0.59155900 |
| C | 1.49823500  | -2.57046900 | -1.29117300 |
| C | 1.43538900  | -1.97969800 | -2.56718300 |
| C | 2.39412200  | -3.63073900 | -1.07669600 |
| C | 2.25994400  | -2.42607600 | -3.59488200 |
| H | 0.73835000  | -1.16559300 | -2.73091700 |
| C | 3.20974300  | -4.08648200 | -2.11188400 |
| H | 2.44568600  | -4.12051400 | -0.11216400 |
| C | 3.14943100  | -3.48205200 | -3.36929500 |
| H | 2.21067800  | -1.95424700 | -4.57200100 |
| H | 3.89126600  | -4.91347900 | -1.93560700 |
| H | 3.79119900  | -3.83366300 | -4.17234100 |
| C | 0.74159500  | 0.43980100  | 2.07392900  |
| C | -0.20208100 | 0.48306700  | 3.25175900  |
| H | -0.61548500 | -0.50660300 | 3.51207800  |
| H | 0.31252100  | 0.84405000  | 4.15412100  |
| H | -1.04367900 | 1.15116800  | 3.05131900  |
| C | 0.39950100  | 0.96322200  | 0.86471400  |
| O | -0.77354300 | 1.45100200  | 0.53891200  |
| O | 1.38154200  | 0.93038400  | -0.12329400 |
| C | 1.16975000  | 1.70060700  | -1.31431500 |
| H | 0.10770800  | 1.69208300  | -1.57252100 |
| H | 1.72946400  | 1.17387000  | -2.09290600 |
| C | 1.67781700  | 3.12248500  | -1.18686800 |
| C | 0.94395300  | 4.08415000  | -0.47535400 |
| C | 2.89179700  | 3.49972400  | -1.77405400 |
| C | 1.41792500  | 5.39109300  | -0.35503500 |
| H | 0.00356300  | 3.79248800  | -0.01603800 |
| C | 3.36686100  | 4.80872600  | -1.65922300 |
| H | 3.46925300  | 2.76231100  | -2.32780700 |
| C | 2.63011500  | 5.75782300  | -0.94789200 |
| H | 0.83924100  | 6.12671700  | 0.19805900  |
| H | 4.30978800  | 5.08568600  | -2.12384500 |
| H | 2.99638000  | 6.77715300  | -0.85671300 |

### ZSi-M6

|   |             |             |             |
|---|-------------|-------------|-------------|
| C | -3.01729100 | -2.02621300 | 0.61814700  |
| C | -2.19854100 | -2.79149600 | -0.23993300 |
| C | -4.50134500 | -1.75983900 | 0.37570500  |
| C | -2.62209300 | -3.40684600 | -1.56155000 |
| C | -3.60077300 | -0.09392700 | -1.33296400 |

|    |             |             |             |
|----|-------------|-------------|-------------|
| C  | -2.99263000 | -0.97868800 | -2.24562600 |
| C  | -4.73507800 | -0.43254500 | -0.38069200 |
| C  | -3.42565500 | -2.42802600 | -2.45052900 |
| H  | -4.94082300 | -2.60018500 | -0.17388900 |
| H  | -5.02213400 | -1.72357900 | 1.33940800  |
| H  | -3.19263800 | -4.33388100 | -1.39463400 |
| H  | -1.70886600 | -3.70162800 | -2.09079200 |
| H  | -4.80147900 | 0.38287200  | 0.34663500  |
| H  | -5.69817600 | -0.45350400 | -0.91393600 |
| H  | -3.28640900 | -2.70052600 | -3.50277600 |
| H  | -4.49922700 | -2.52401700 | -2.25373600 |
| H  | -2.43837400 | -0.52940600 | -3.06933200 |
| H  | -1.30112700 | -3.22347000 | 0.20053300  |
| H  | -3.48374200 | 0.97109000  | -1.53214500 |
| H  | -2.68160100 | -1.92239400 | 1.64925600  |
| Rh | -1.73499400 | -0.73817200 | -0.51555900 |
| C  | -1.64478400 | 2.31226400  | 1.08440900  |
| C  | -0.90866800 | 1.45423900  | 1.92575600  |
| C  | -1.53037500 | 0.97688900  | 3.09387200  |
| C  | -2.83685400 | 1.34039000  | 3.42524000  |
| C  | -3.55202100 | 2.19754500  | 2.58504600  |
| C  | -2.95514000 | 2.67827100  | 1.41797000  |
| C  | -0.96188800 | 2.89169900  | -0.13546200 |
| C  | -0.08498000 | 1.91887400  | -0.92009700 |
| H  | -0.96788600 | 0.31579000  | 3.74912900  |
| H  | -3.29275200 | 0.96041400  | 4.33607700  |
| H  | -4.56824200 | 2.49262800  | 2.83639100  |
| H  | -3.51123600 | 3.34423900  | 0.76091700  |
| H  | -1.72182500 | 3.25724900  | -0.84441500 |
| H  | -0.38037900 | 3.76812600  | 0.16274400  |
| O  | -0.58082000 | 0.86368300  | -1.38291100 |
| C  | 1.27085300  | 2.30924000  | -1.38988000 |
| C  | 1.86784000  | 3.55361700  | -1.11148200 |
| C  | 1.97726300  | 1.39378300  | -2.19670000 |
| C  | 3.12507600  | 3.87128900  | -1.62742500 |
| H  | 1.36073800  | 4.28927100  | -0.49824000 |
| C  | 3.22925700  | 1.71390600  | -2.71138900 |
| H  | 1.52038300  | 0.43494400  | -2.41225400 |
| C  | 3.80894700  | 2.95689000  | -2.43104500 |
| H  | 3.56614100  | 4.83808500  | -1.40388700 |
| H  | 3.75561700  | 0.99661100  | -3.33656100 |
| H  | 4.78477900  | 3.20924700  | -2.83638800 |
| C  | 0.50856200  | 1.11273500  | 1.61360400  |
| C  | 1.58532000  | 2.04027700  | 2.12902400  |

|   |             |             |             |
|---|-------------|-------------|-------------|
| H | 1.29199200  | 3.09216800  | 2.00617200  |
| H | 1.79031700  | 1.89965500  | 3.20488600  |
| H | 2.52875600  | 1.89346800  | 1.59540000  |
| C | 0.80160800  | -0.15109900 | 1.12814500  |
| O | -0.02133200 | -1.05049200 | 0.70530200  |
| O | 2.13843700  | -0.48156700 | 1.10801600  |
| C | 2.49796200  | -1.74580000 | 0.53230800  |
| H | 2.15329100  | -1.78705500 | -0.50860400 |
| H | 2.00330500  | -2.55995700 | 1.07304700  |
| C | 3.99911700  | -1.88506600 | 0.61457000  |
| C | 4.58113800  | -2.93359700 | 1.33477900  |
| C | 4.83561000  | -0.96602500 | -0.03654000 |
| C | 5.97062400  | -3.07312500 | 1.39905000  |
| H | 3.94171700  | -3.64713900 | 1.84958900  |
| C | 6.22224300  | -1.09706400 | 0.03170900  |
| H | 4.39440800  | -0.14171300 | -0.59021300 |
| C | 6.79487200  | -2.15323100 | 0.74927000  |
| H | 6.40577200  | -3.89342500 | 1.96273500  |
| H | 6.85950900  | -0.37803200 | -0.47676500 |
| H | 7.87559800  | -2.25712600 | 0.79882400  |

### ZRe-M6

|    |            |             |             |
|----|------------|-------------|-------------|
| C  | 2.31510900 | -2.74783300 | -0.41565200 |
| C  | 2.87777000 | -2.01992600 | 0.65687400  |
| C  | 3.09976900 | -3.21917700 | -1.63752200 |
| C  | 4.31559800 | -1.54707600 | 0.75686800  |
| C  | 2.92319700 | -0.76414100 | -2.31494900 |
| C  | 3.69414900 | -0.17386600 | -1.29371000 |
| C  | 3.02922500 | -2.20026100 | -2.79816300 |
| C  | 4.81999400 | -0.88343400 | -0.54516900 |
| H  | 4.14127500 | -3.40971100 | -1.35710300 |
| H  | 2.69692900 | -4.18075100 | -1.97487600 |
| H  | 4.97683900 | -2.37756500 | 1.05225300  |
| H  | 4.36135500 | -0.81619400 | 1.57140900  |
| H  | 2.13763600 | -2.40921000 | -3.40080800 |
| H  | 3.89093200 | -2.32278500 | -3.47341700 |
| H  | 5.60131800 | -0.15551300 | -0.29835900 |
| H  | 5.29356700 | -1.62381000 | -1.19825000 |
| H  | 3.73194800 | 0.91410200  | -1.27406100 |
| H  | 2.34536100 | -2.06861600 | 1.60584200  |
| H  | 2.43705300 | -0.08534100 | -3.01639700 |
| H  | 1.39110200 | -3.28334700 | -0.20337800 |
| Rh | 1.73677400 | -0.69348600 | -0.54381400 |

|   |             |             |             |
|---|-------------|-------------|-------------|
| C | 1.62514900  | 2.28132900  | 1.16951900  |
| C | 0.92503700  | 1.35489900  | 1.96920200  |
| C | 1.58936600  | 0.81256900  | 3.08494900  |
| C | 2.89942600  | 1.17200500  | 3.40526300  |
| C | 3.57834900  | 2.09396400  | 2.60441300  |
| C | 2.94080400  | 2.63811700  | 1.48909500  |
| C | 0.91602900  | 2.93557500  | 0.00499400  |
| C | 0.07425500  | 1.99567600  | -0.85444000 |
| H | 1.05402600  | 0.10116400  | 3.70857300  |
| H | 3.38569400  | 0.74035400  | 4.27647200  |
| H | 4.59731800  | 2.38576700  | 2.84538600  |
| H | 3.46805900  | 3.35280400  | 0.86077400  |
| H | 0.30644000  | 3.76872700  | 0.36404400  |
| H | 1.66365300  | 3.37820500  | -0.67080000 |
| O | 0.60407000  | 0.97525900  | -1.34739000 |
| C | -1.28402600 | 2.37489800  | -1.32408500 |
| C | -1.95708600 | 1.48072800  | -2.18299000 |
| C | -1.91290700 | 3.59164400  | -1.00066300 |
| C | -3.20893300 | 1.79338600  | -2.70022200 |
| H | -1.47672800 | 0.54088300  | -2.43007000 |
| C | -3.17066100 | 3.90194200  | -1.51852700 |
| H | -1.43191900 | 4.31054600  | -0.34794500 |
| C | -3.82086700 | 3.00926500  | -2.37231700 |
| H | -3.71119700 | 1.09328200  | -3.36226600 |
| H | -3.63952500 | 4.84624000  | -1.25744900 |
| H | -4.79624400 | 3.25775700  | -2.78104400 |
| C | -0.49952700 | 1.01139900  | 1.69110500  |
| C | -1.56509100 | 1.92141500  | 2.25469900  |
| H | -1.26081500 | 2.97451700  | 2.18344400  |
| H | -2.51156300 | 1.81034300  | 1.71780900  |
| H | -1.76907500 | 1.73162900  | 3.32152700  |
| C | -0.80402500 | -0.20477800 | 1.11382800  |
| O | 0.00241400  | -1.07762000 | 0.60387800  |
| O | -2.14406100 | -0.53623100 | 1.09001600  |
| C | -2.50651200 | -1.75456800 | 0.43053100  |
| H | -1.98773900 | -2.60288200 | 0.89019100  |
| H | -2.19676200 | -1.71241100 | -0.62117400 |
| C | -4.00349900 | -1.91893400 | 0.54603800  |
| C | -4.86726600 | -1.00502900 | -0.07629700 |
| C | -4.55477400 | -2.97664200 | 1.27645000  |
| C | -6.24982200 | -1.15039400 | 0.02932000  |
| H | -4.44989100 | -0.17313500 | -0.63789500 |
| C | -5.94035700 | -3.13010300 | 1.37932900  |
| H | -3.89380600 | -3.68686900 | 1.76833800  |

|   |             |             |             |
|---|-------------|-------------|-------------|
| C | -6.79121500 | -2.21548600 | 0.75737400  |
| H | -6.90873100 | -0.43645400 | -0.45828200 |
| H | -6.35168000 | -3.95786600 | 1.95089200  |
| H | -7.86897300 | -2.33120100 | 0.83534000  |

## M7RR

|    |             |             |             |
|----|-------------|-------------|-------------|
| C  | -1.99299200 | -2.78311200 | 0.44097200  |
| C  | -3.00196700 | -1.86514300 | 0.77688100  |
| C  | -2.02525300 | -3.75198200 | -0.73018400 |
| C  | -4.33736900 | -1.74772500 | 0.04694800  |
| C  | -2.10837500 | -1.62253600 | -2.13801800 |
| C  | -2.93078000 | -0.55406300 | -1.71920100 |
| C  | -2.49986300 | -3.09631500 | -2.04931500 |
| C  | -4.29456800 | -0.67351400 | -1.06414100 |
| H  | -1.00479700 | -4.12845600 | -0.86961000 |
| H  | -2.64579900 | -4.63161400 | -0.49552200 |
| H  | -5.12200200 | -1.48961100 | 0.76747300  |
| H  | -4.62096100 | -2.72038800 | -0.36976200 |
| H  | -3.58511600 | -3.19756900 | -2.15822300 |
| H  | -2.06055600 | -3.63565200 | -2.89615500 |
| H  | -5.07453000 | -0.86523900 | -1.81876200 |
| H  | -4.52661900 | 0.30283400  | -0.62328500 |
| H  | -2.72781800 | 0.41621000  | -2.16962600 |
| H  | -2.98250400 | -1.46127800 | 1.78867100  |
| H  | -1.33254300 | -1.37882600 | -2.86261200 |
| H  | -1.28008500 | -3.04178100 | 1.22459600  |
| Rh | -1.39076400 | -0.84698100 | -0.28356800 |
| C  | -1.74896300 | 2.67013300  | 0.08518200  |
| C  | -1.15487900 | 2.04957600  | 1.19274100  |
| C  | -1.86189200 | 1.89271300  | 2.38532900  |
| C  | -3.18461500 | 2.34328500  | 2.45669600  |
| C  | -3.78293600 | 2.95443400  | 1.34982700  |
| C  | -3.06539400 | 3.12422000  | 0.15985800  |
| C  | -0.76958400 | 2.77340200  | -1.05348600 |
| C  | 0.29854100  | 1.66889700  | -0.74347300 |
| H  | -1.40166200 | 1.42021700  | 3.25011300  |
| H  | -3.74791100 | 2.21941200  | 3.37779600  |
| H  | -4.81021900 | 3.30348500  | 1.41529000  |
| H  | -3.53163400 | 3.60634800  | -0.69612700 |
| H  | -1.20621700 | 2.57695100  | -2.03741100 |
| H  | -0.34746700 | 3.78548300  | -1.07854000 |
| O  | -0.14276400 | 0.46126200  | -1.24261100 |
| C  | 1.70314700  | 1.93540900  | -1.31656800 |



|   |            |             |             |
|---|------------|-------------|-------------|
| C | 2.17560700 | 3.20050100  | -1.69555100 |
| C | 2.57134300 | 0.84121800  | -1.46843900 |
| C | 3.46788100 | 3.36811600  | -2.20374500 |
| H | 1.54198300 | 4.07668100  | -1.60473400 |
| C | 3.86459100 | 1.00523200  | -1.96335300 |
| H | 2.21176400 | -0.14816200 | -1.20970800 |
| C | 4.32064000 | 2.27260200  | -2.33648300 |
| H | 3.80303600 | 4.36018800  | -2.49628600 |
| H | 4.51483900 | 0.13945100  | -2.06052100 |
| H | 5.32562100 | 2.40275800  | -2.72969500 |
| C | 0.30972600 | 1.72978300  | 0.90750900  |
| C | 1.18927900 | 2.87382700  | 1.45614700  |
| H | 0.87388000 | 3.82727100  | 1.02322900  |
| H | 1.07977900 | 2.94953300  | 2.54324200  |
| H | 2.24519000 | 2.72446700  | 1.22405500  |
| C | 0.71567300 | 0.39020400  | 1.47823000  |
| O | 0.04116200 | -0.64269400 | 1.37799000  |
| O | 1.87766400 | 0.39200900  | 2.12279600  |
| C | 2.37480300 | -0.87079400 | 2.68060000  |
| H | 1.51909100 | -1.47318200 | 2.98631100  |
| H | 2.93542100 | -0.55024500 | 3.55997200  |
| C | 3.25686400 | -1.59591800 | 1.69800300  |
| C | 2.73351600 | -2.59455400 | 0.86474700  |
| C | 4.61567000 | -1.26740200 | 1.59932700  |
| C | 3.55563600 | -3.25079600 | -0.05322100 |
| H | 1.68088500 | -2.85230500 | 0.93548600  |
| C | 5.43828400 | -1.92153000 | 0.68136600  |
| H | 5.02998200 | -0.49667500 | 2.24492000  |
| C | 4.90861900 | -2.91441700 | -0.14742600 |
| H | 3.14066400 | -4.02545200 | -0.69213900 |
| H | 6.49093300 | -1.66048800 | 0.61606300  |
| H | 5.54891300 | -3.42735200 | -0.85989100 |

## M7SR

|   |             |             |             |
|---|-------------|-------------|-------------|
| C | -3.07105300 | -1.68884500 | -0.01660200 |
| C | -2.89526500 | -1.22998900 | -1.35384900 |
| C | -4.31895700 | -2.41068500 | 0.48985400  |
| C | -3.91864400 | -1.33541800 | -2.46760900 |
| C | -5.29751000 | -0.05727900 | 0.43185600  |
| C | -5.26201400 | 0.18916000  | -0.95298600 |
| C | -5.35255300 | -1.42806800 | 1.08557500  |
| C | -5.33025200 | -0.89791500 | -2.02049100 |
| H | -4.76391200 | -2.99131200 | -0.32589600 |

|    |             |             |             |
|----|-------------|-------------|-------------|
| H  | -4.02745300 | -3.13807000 | 1.25523400  |
| H  | -3.93440400 | -2.35887800 | -2.87520200 |
| H  | -3.58224400 | -0.68803000 | -3.28593100 |
| H  | -5.14108100 | -1.29190600 | 2.15245700  |
| H  | -6.36812700 | -1.84962300 | 1.02589700  |
| H  | -5.88840300 | -0.52181200 | -2.88511800 |
| H  | -5.89894100 | -1.75509000 | -1.64422100 |
| H  | -5.54739200 | 1.18942100  | -1.28143100 |
| H  | -1.86165700 | -1.13856200 | -1.67980800 |
| H  | -5.63122000 | 0.76395600  | 1.07053100  |
| H  | -2.15587300 | -1.89457300 | 0.53584900  |
| Rh | -3.27306000 | 0.42259200  | -0.09493400 |
| C  | 1.56267400  | 3.06768800  | 0.34315000  |
| C  | 1.87782900  | 2.10087500  | -0.62020900 |
| C  | 3.07414800  | 2.19251300  | -1.33639700 |
| C  | 3.95925700  | 3.23939100  | -1.06281800 |
| C  | 3.65009600  | 4.19389100  | -0.08789800 |
| C  | 2.44653700  | 4.11219200  | 0.61791900  |
| C  | 0.20427600  | 2.81909600  | 0.93802100  |
| C  | -0.18392300 | 1.34644300  | 0.53467300  |
| H  | 3.33017900  | 1.44825000  | -2.08365500 |
| H  | 4.89669700  | 3.30709900  | -1.60872800 |
| H  | 4.34769700  | 5.00068800  | 0.12178200  |
| H  | 2.20188400  | 4.85502400  | 1.37362600  |
| H  | 0.16602100  | 2.95996300  | 2.02342800  |
| H  | -0.54541400 | 3.48781600  | 0.49576000  |
| O  | -1.53996200 | 1.32789200  | 0.28422600  |
| C  | 0.22363500  | 0.40212400  | 1.69554600  |
| C  | -0.76052100 | -0.25222900 | 2.44806400  |
| C  | 1.56304400  | 0.24023900  | 2.09643700  |
| C  | -0.42777900 | -1.05992300 | 3.53943300  |
| H  | -1.80104200 | -0.12054100 | 2.17534900  |
| C  | 1.89824700  | -0.56295100 | 3.18868500  |
| H  | 2.35911300  | 0.74102600  | 1.55851600  |
| C  | 0.90524700  | -1.22382300 | 3.91531200  |
| H  | -1.21739600 | -1.55647000 | 4.09866900  |
| H  | 2.94240900  | -0.66263000 | 3.47597300  |
| H  | 1.16744300  | -1.84917100 | 4.76476300  |
| C  | 0.72963300  | 1.11438000  | -0.80233800 |
| C  | -0.06870600 | 1.51838900  | -2.06489600 |
| H  | 0.57383900  | 1.44539800  | -2.95022600 |
| H  | -0.93761700 | 0.87466600  | -2.20191600 |
| H  | -0.41231000 | 2.55272200  | -1.97873800 |
| C  | 1.11090400  | -0.35567400 | -0.95879400 |

|   |            |             |             |
|---|------------|-------------|-------------|
| O | 0.31067000 | -1.23554100 | -1.22738500 |
| O | 2.42108700 | -0.61181000 | -0.78536200 |
| C | 2.80845900 | -2.01207500 | -0.87789900 |
| H | 2.49034400 | -2.39723600 | -1.85016600 |
| H | 2.27144000 | -2.56250100 | -0.10038700 |
| C | 4.29971200 | -2.09629400 | -0.70006400 |
| C | 5.14877400 | -2.14172200 | -1.81290800 |
| C | 4.86052300 | -2.11988300 | 0.58423200  |
| C | 6.53370700 | -2.20855800 | -1.64781500 |
| H | 4.72230500 | -2.12817400 | -2.81326200 |
| C | 6.24404300 | -2.18500500 | 0.75280800  |
| H | 4.20673300 | -2.08644400 | 1.45249300  |
| C | 7.08345800 | -2.22996700 | -0.36397000 |
| H | 7.18149800 | -2.24682400 | -2.51941900 |
| H | 6.66714500 | -2.20476300 | 1.75347800  |
| H | 8.16090400 | -2.28487000 | -0.23363500 |

## M7SS

|    |             |             |             |
|----|-------------|-------------|-------------|
| C  | -1.99299200 | -2.78311200 | -0.44097200 |
| C  | -3.00196700 | -1.86514300 | -0.77688100 |
| C  | -2.02525300 | -3.75198200 | 0.73018400  |
| C  | -4.33736900 | -1.74772500 | -0.04694800 |
| C  | -2.10837500 | -1.62253600 | 2.13801800  |
| C  | -2.93078000 | -0.55406300 | 1.71920100  |
| C  | -2.49986300 | -3.09631500 | 2.04931500  |
| C  | -4.29456800 | -0.67351400 | 1.06414100  |
| H  | -1.00479700 | -4.12845600 | 0.86961000  |
| H  | -2.64579900 | -4.63161400 | 0.49552200  |
| H  | -5.12200200 | -1.48961100 | -0.76747300 |
| H  | -4.62096100 | -2.72038800 | 0.36976200  |
| H  | -3.58511600 | -3.19756900 | 2.15822300  |
| H  | -2.06055600 | -3.63565200 | 2.89615500  |
| H  | -5.07453000 | -0.86523900 | 1.81876200  |
| H  | -4.52661900 | 0.30283400  | 0.62328500  |
| H  | -2.72781800 | 0.41621000  | 2.16962600  |
| H  | -2.98250400 | -1.46127800 | -1.78867100 |
| H  | -1.33254300 | -1.37882600 | 2.86261200  |
| H  | -1.28008500 | -3.04178100 | -1.22459600 |
| Rh | -1.39076400 | -0.84698100 | 0.28356800  |
| C  | -1.74896300 | 2.67013300  | -0.08518200 |
| C  | -1.15487900 | 2.04957600  | -1.19274100 |
| C  | -1.86189200 | 1.89271300  | -2.38532900 |
| C  | -3.18461500 | 2.34328500  | -2.45669600 |

|   |             |             |             |
|---|-------------|-------------|-------------|
| C | -3.78293600 | 2.95443400  | -1.34982700 |
| C | -3.06539400 | 3.12422000  | -0.15985800 |
| C | -0.76958400 | 2.77340200  | 1.05348600  |
| C | 0.29854100  | 1.66889700  | 0.74347300  |
| H | -1.40166200 | 1.42021700  | -3.25011300 |
| H | -3.74791100 | 2.21941200  | -3.37779600 |
| H | -4.81021900 | 3.30348500  | -1.41529000 |
| H | -3.53163400 | 3.60634800  | 0.69612700  |
| H | -1.20621700 | 2.57695100  | 2.03741100  |
| H | -0.34746700 | 3.78548300  | 1.07854000  |
| O | -0.14276400 | 0.46126200  | 1.24261100  |
| C | 1.70314700  | 1.93540900  | 1.31656800  |
| C | 2.17560700  | 3.20050100  | 1.69555100  |
| C | 2.57134300  | 0.84121800  | 1.46843900  |
| C | 3.46788100  | 3.36811600  | 2.20374500  |
| H | 1.54198300  | 4.07668100  | 1.60473400  |
| C | 3.86459100  | 1.00523200  | 1.96335300  |
| H | 2.21176400  | -0.14816200 | 1.20970800  |
| C | 4.32064000  | 2.27260200  | 2.33648300  |
| H | 3.80303600  | 4.36018800  | 2.49628600  |
| H | 4.51483900  | 0.13945100  | 2.06052100  |
| H | 5.32562100  | 2.40275800  | 2.72969500  |
| C | 0.30972600  | 1.72978300  | -0.90750900 |
| C | 1.18927900  | 2.87382700  | -1.45614700 |
| H | 0.87388000  | 3.82727100  | -1.02322900 |
| H | 1.07977900  | 2.94953300  | -2.54324200 |
| H | 2.24519000  | 2.72446700  | -1.22405500 |
| C | 0.71567300  | 0.39020400  | -1.47823000 |
| O | 0.04116200  | -0.64269400 | -1.37799000 |
| O | 1.87766400  | 0.39200900  | -2.12279600 |
| C | 2.37480300  | -0.87079400 | -2.68060000 |
| H | 1.51909100  | -1.47318200 | -2.98631100 |
| H | 2.93542100  | -0.55024500 | -3.55997200 |
| C | 3.25686400  | -1.59591800 | -1.69800300 |
| C | 2.73351600  | -2.59455400 | -0.86474700 |
| C | 4.61567000  | -1.26740200 | -1.59932700 |
| C | 3.55563600  | -3.25079600 | 0.05322100  |
| H | 1.68088500  | -2.85230500 | -0.93548600 |
| C | 5.43828400  | -1.92153000 | -0.68136600 |
| H | 5.02998200  | -0.49667500 | -2.24492000 |
| C | 4.90861900  | -2.91441700 | 0.14742600  |
| H | 3.14066400  | -4.02545200 | 0.69213900  |
| H | 6.49093300  | -1.66048800 | -0.61606300 |
| H | 5.54891300  | -3.42735200 | 0.85989100  |

## M7RS

|    |             |             |             |
|----|-------------|-------------|-------------|
| C  | -3.07105300 | -1.68884500 | 0.01660200  |
| C  | -2.89526500 | -1.22998900 | 1.35384900  |
| C  | -4.31895700 | -2.41068500 | -0.48985400 |
| C  | -3.91864400 | -1.33541800 | 2.46760900  |
| C  | -5.29751000 | -0.05727900 | -0.43185600 |
| C  | -5.26201400 | 0.18916000  | 0.95298600  |
| C  | -5.35255300 | -1.42806800 | -1.08557500 |
| C  | -5.33025200 | -0.89791500 | 2.02049100  |
| H  | -4.76391200 | -2.99131200 | 0.32589600  |
| H  | -4.02745300 | -3.13807000 | -1.25523400 |
| H  | -3.93440400 | -2.35887800 | 2.87520200  |
| H  | -3.58224400 | -0.68803000 | 3.28593100  |
| H  | -5.14108100 | -1.29190600 | -2.15245700 |
| H  | -6.36812700 | -1.84962300 | -1.02589700 |
| H  | -5.88840300 | -0.52181200 | 2.88511800  |
| H  | -5.89894100 | -1.75509000 | 1.64422100  |
| H  | -5.54739200 | 1.18942100  | 1.28143100  |
| H  | -1.86165700 | -1.13856200 | 1.67980800  |
| H  | -5.63122000 | 0.76395600  | -1.07053100 |
| H  | -2.15587300 | -1.89457300 | -0.53584900 |
| Rh | -3.27306000 | 0.42259200  | 0.09493400  |
| C  | 1.56267400  | 3.06768800  | -0.34315000 |
| C  | 1.87782900  | 2.10087500  | 0.62020900  |
| C  | 3.07414800  | 2.19251300  | 1.33639700  |
| C  | 3.95925700  | 3.23939100  | 1.06281800  |
| C  | 3.65009600  | 4.19389100  | 0.08789800  |
| C  | 2.44653700  | 4.11219200  | -0.61791900 |
| C  | 0.20427600  | 2.81909600  | -0.93802100 |
| C  | -0.18392300 | 1.34644300  | -0.53467300 |
| H  | 3.33017900  | 1.44825000  | 2.08365500  |
| H  | 4.89669700  | 3.30709900  | 1.60872800  |
| H  | 4.34769700  | 5.00068800  | -0.12178200 |
| H  | 2.20188400  | 4.85502400  | -1.37362600 |
| H  | 0.16602100  | 2.95996300  | -2.02342800 |
| H  | -0.54541400 | 3.48781600  | -0.49576000 |
| O  | -1.53996200 | 1.32789200  | -0.28422600 |
| C  | 0.22363500  | 0.40212400  | -1.69554600 |
| C  | -0.76052100 | -0.25222900 | -2.44806400 |
| C  | 1.56304400  | 0.24023900  | -2.09643700 |
| C  | -0.42777900 | -1.05992300 | -3.53943300 |
| H  | -1.80104200 | -0.12054100 | -2.17534900 |

|   |             |             |             |
|---|-------------|-------------|-------------|
| C | 1.89824700  | -0.56295100 | -3.18868500 |
| H | 2.35911300  | 0.74102600  | -1.55851600 |
| C | 0.90524700  | -1.22382300 | -3.91531200 |
| H | -1.21739600 | -1.55647000 | -4.09866900 |
| H | 2.94240900  | -0.66263000 | -3.47597300 |
| H | 1.16744300  | -1.84917100 | -4.76476300 |
| C | 0.72963300  | 1.11438000  | 0.80233800  |
| C | -0.06870600 | 1.51838900  | 2.06489600  |
| H | 0.57383900  | 1.44539800  | 2.95022600  |
| H | -0.93761700 | 0.87466600  | 2.20191600  |
| H | -0.41231000 | 2.55272200  | 1.97873800  |
| C | 1.11090400  | -0.35567400 | 0.95879400  |
| O | 0.31067000  | -1.23554100 | 1.22738500  |
| O | 2.42108700  | -0.61181000 | 0.78536200  |
| C | 2.80845900  | -2.01207500 | 0.87789900  |
| H | 2.49034400  | -2.39723600 | 1.85016600  |
| H | 2.27144000  | -2.56250100 | 0.10038700  |
| C | 4.29971200  | -2.09629400 | 0.70006400  |
| C | 5.14877400  | -2.14172200 | 1.81290800  |
| C | 4.86052300  | -2.11988300 | -0.58423200 |
| C | 6.53370700  | -2.20855800 | 1.64781500  |
| H | 4.72230500  | -2.12817400 | 2.81326200  |
| C | 6.24404300  | -2.18500500 | -0.75280800 |
| H | 4.20673300  | -2.08644400 | -1.45249300 |
| C | 7.08345800  | -2.22996700 | 0.36397000  |
| H | 7.18149800  | -2.24682400 | 2.51941900  |
| H | 6.66714500  | -2.20476300 | -1.75347800 |
| H | 8.16090400  | -2.28487000 | 0.23363500  |

**PRR**

|   |            |             |             |
|---|------------|-------------|-------------|
| C | 2.18762300 | -1.41895900 | -1.00064600 |
| C | 1.79683600 | -1.48039200 | 0.34230300  |
| C | 2.38638700 | -2.39582000 | 1.21088100  |
| C | 3.37878100 | -3.25347800 | 0.72335300  |
| C | 3.77133600 | -3.19139800 | -0.61681300 |
| C | 3.17723700 | -2.27098600 | -1.48741600 |
| C | 1.40414500 | -0.35546900 | -1.72893700 |
| C | 0.82831500 | 0.53933300  | -0.58955300 |
| H | 2.08749300 | -2.44781000 | 2.25455800  |
| H | 3.84951600 | -3.96860900 | 1.39258600  |
| H | 4.54660000 | -3.85847100 | -0.98440700 |
| H | 3.48846800 | -2.22081200 | -2.52810000 |
| H | 1.99925800 | 0.21697000  | -2.44865700 |

|   |             |             |             |
|---|-------------|-------------|-------------|
| H | 0.56029800  | -0.80210500 | -2.26722100 |
| O | -0.49231300 | 0.99637700  | -0.88248700 |
| C | 1.73607900  | 1.73620100  | -0.27497900 |
| C | 1.16464200  | 2.94927000  | 0.13855900  |
| C | 3.13413600  | 1.66708500  | -0.38657400 |
| C | 1.96095000  | 4.05925800  | 0.42563700  |
| H | 0.08613900  | 3.01934900  | 0.23111700  |
| C | 3.93139200  | 2.77519100  | -0.09509500 |
| H | 3.61183700  | 0.74454400  | -0.69921100 |
| C | 3.34915600  | 3.97747300  | 0.31069300  |
| H | 1.49258300  | 4.98853900  | 0.73954900  |
| H | 5.01117400  | 2.69695800  | -0.19115900 |
| H | 3.97084400  | 4.84061500  | 0.53284200  |
| C | 0.69600600  | -0.47061800 | 0.64681300  |
| C | 0.82914600  | 0.18850000  | 2.02652600  |
| H | 1.83446300  | 0.59687900  | 2.15519800  |
| H | 0.10495500  | 0.99649700  | 2.15208000  |
| H | 0.65074400  | -0.54327600 | 2.82055600  |
| C | -0.66734200 | -1.18758500 | 0.48297400  |
| O | -0.88338700 | -2.05386500 | -0.34175200 |
| O | -1.58115200 | -0.75360500 | 1.37014200  |
| C | -2.90558700 | -1.36203500 | 1.31555000  |
| H | -3.23093800 | -1.37997600 | 2.35767200  |
| H | -2.79861600 | -2.38265500 | 0.94507000  |
| C | -3.85743700 | -0.55871200 | 0.46511300  |
| C | -4.65871800 | 0.43193000  | 1.04638500  |
| C | -3.95255700 | -0.78762300 | -0.91487700 |
| C | -5.54038300 | 1.18251000  | 0.26675300  |
| H | -4.59384600 | 0.61349500  | 2.11684700  |
| C | -4.83345000 | -0.03879000 | -1.69578200 |
| H | -3.32672600 | -1.54951800 | -1.36982600 |
| C | -5.62908800 | 0.94759300  | -1.10696400 |
| H | -6.15893800 | 1.94576300  | 0.73129700  |
| H | -4.90166100 | -0.22724300 | -2.76395400 |
| H | -6.31746800 | 1.52788800  | -1.71567800 |
| H | -0.43698800 | 1.58685600  | -1.65179700 |

**PRS**

|   |            |             |             |
|---|------------|-------------|-------------|
| C | 1.10065700 | -1.82269900 | 1.14685900  |
| C | 1.56157800 | -1.85817400 | -0.17309400 |
| C | 1.76314400 | -3.07217100 | -0.82688000 |
| C | 1.50430700 | -4.26276400 | -0.13871000 |
| C | 1.04729700 | -4.23034600 | 1.18187700  |

|   |             |             |             |
|---|-------------|-------------|-------------|
| C | 0.84271400  | -3.00805700 | 1.83191400  |
| C | 0.94548400  | -0.40059000 | 1.62032300  |
| C | 1.78993500  | 0.42239700  | 0.60834600  |
| H | 2.11759900  | -3.10246100 | -1.85382300 |
| H | 1.66243500  | -5.21687700 | -0.63420700 |
| H | 0.85372700  | -5.16055100 | 1.70958900  |
| H | 0.49297600  | -2.98709500 | 2.86128600  |
| H | 1.32102600  | -0.24375500 | 2.63604100  |
| H | -0.10307400 | -0.08849200 | 1.59058200  |
| O | 3.12336400  | 0.35542400  | 1.15073700  |
| C | 1.39516100  | 1.89779100  | 0.51542700  |
| C | 1.20019300  | 2.60261100  | 1.71624800  |
| C | 1.30838100  | 2.61400700  | -0.68625300 |
| C | 0.90548900  | 3.96413100  | 1.71596100  |
| H | 1.28685900  | 2.07864900  | 2.66314000  |
| C | 1.01488500  | 3.98156300  | -0.68977100 |
| H | 1.46075100  | 2.12054700  | -1.63931900 |
| C | 0.80964300  | 4.66187700  | 0.50880000  |
| H | 0.75276700  | 4.48152500  | 2.65944600  |
| H | 0.94968400  | 4.51003700  | -1.63711000 |
| H | 0.58050700  | 5.72403900  | 0.50551500  |
| C | 1.75744600  | -0.44608800 | -0.73413000 |
| C | 3.03796200  | -0.31995800 | -1.57348300 |
| H | 3.89447600  | -0.67632000 | -0.99796100 |
| H | 3.22406300  | 0.71409800  | -1.88189600 |
| H | 2.95522800  | -0.91618400 | -2.48486500 |
| C | 0.53848300  | -0.15602400 | -1.62871900 |
| O | 0.58246200  | -0.02662900 | -2.83681900 |
| O | -0.60907900 | -0.10632500 | -0.92565200 |
| C | -1.82606100 | 0.09575900  | -1.69292100 |
| H | -1.79398700 | 1.08888100  | -2.14997100 |
| H | -1.84404300 | -0.64511100 | -2.49830300 |
| C | -2.99990400 | -0.05107200 | -0.76175800 |
| C | -3.91621900 | 0.99372400  | -0.60337900 |
| C | -3.20239500 | -1.24732800 | -0.05806800 |
| C | -5.02262900 | 0.84768000  | 0.23732700  |
| H | -3.76420700 | 1.92708700  | -1.14022700 |
| C | -4.30027300 | -1.39141300 | 0.78862900  |
| H | -2.49088800 | -2.06147700 | -0.16921700 |
| C | -5.21573800 | -0.34455000 | 0.93579000  |
| H | -5.72756000 | 1.66699200  | 0.34927300  |
| H | -4.44533500 | -2.32170700 | 1.33122300  |
| H | -6.07361700 | -0.45938000 | 1.59281600  |
| H | 3.67940200  | 0.96595100  | 0.63984800  |



## PSR

|   |             |             |             |
|---|-------------|-------------|-------------|
| C | 1.10065700  | -1.82269900 | -1.14685900 |
| C | 1.56157800  | -1.85817400 | 0.17309400  |
| C | 1.76314400  | -3.07217100 | 0.82688000  |
| C | 1.50430700  | -4.26276400 | 0.13871000  |
| C | 1.04729700  | -4.23034600 | -1.18187700 |
| C | 0.84271400  | -3.00805700 | -1.83191400 |
| C | 0.94548400  | -0.40059000 | -1.62032300 |
| C | 1.78993500  | 0.42239700  | -0.60834600 |
| H | 2.11759900  | -3.10246100 | 1.85382300  |
| H | 1.66243500  | -5.21687700 | 0.63420700  |
| H | 0.85372700  | -5.16055100 | -1.70958900 |
| H | 0.49297600  | -2.98709500 | -2.86128600 |
| H | 1.32102600  | -0.24375500 | -2.63604100 |
| H | -0.10307400 | -0.08849200 | -1.59058200 |
| O | 3.12336400  | 0.35542400  | -1.15073700 |
| C | 1.39516100  | 1.89779100  | -0.51542700 |
| C | 1.20019300  | 2.60261100  | -1.71624800 |
| C | 1.30838100  | 2.61400700  | 0.68625300  |
| C | 0.90548900  | 3.96413100  | -1.71596100 |
| H | 1.28685900  | 2.07864900  | -2.66314000 |
| C | 1.01488500  | 3.98156300  | 0.68977100  |
| H | 1.46075100  | 2.12054700  | 1.63931900  |
| C | 0.80964300  | 4.66187700  | -0.50880000 |
| H | 0.75276700  | 4.48152500  | -2.65944600 |
| H | 0.94968400  | 4.51003700  | 1.63711000  |
| H | 0.58050700  | 5.72403900  | -0.50551500 |
| C | 1.75744600  | -0.44608800 | 0.73413000  |
| C | 3.03796200  | -0.31995800 | 1.57348300  |
| H | 3.89447600  | -0.67632000 | 0.99796100  |
| H | 3.22406300  | 0.71409800  | 1.88189600  |
| H | 2.95522800  | -0.91618400 | 2.48486500  |
| C | 0.53848300  | -0.15602400 | 1.62871900  |
| O | 0.58246200  | -0.02662900 | 2.83681900  |
| O | -0.60907900 | -0.10632500 | 0.92565200  |
| C | -1.82606100 | 0.09575900  | 1.69292100  |
| H | -1.79398700 | 1.08888100  | 2.14997100  |
| H | -1.84404300 | -0.64511100 | 2.49830300  |
| C | -2.99990400 | -0.05107200 | 0.76175800  |
| C | -3.91621900 | 0.99372400  | 0.60337900  |
| C | -3.20239500 | -1.24732800 | 0.05806800  |
| C | -5.02262900 | 0.84768000  | -0.23732700 |

|   |             |             |             |
|---|-------------|-------------|-------------|
| H | -3.76420700 | 1.92708700  | 1.14022700  |
| C | -4.30027300 | -1.39141300 | -0.78862900 |
| H | -2.49088800 | -2.06147700 | 0.16921700  |
| C | -5.21573800 | -0.34455000 | -0.93579000 |
| H | -5.72756000 | 1.66699200  | -0.34927300 |
| H | -4.44533500 | -2.32170700 | -1.33122300 |
| H | -6.07361700 | -0.45938000 | -1.59281600 |
| H | 3.67940200  | 0.96595100  | -0.63984800 |

## PSS

|   |             |             |             |
|---|-------------|-------------|-------------|
| C | 2.18762300  | -1.41895900 | 1.00064600  |
| C | 1.79683600  | -1.48039200 | -0.34230300 |
| C | 2.38638700  | -2.39582000 | -1.21088100 |
| C | 3.37878100  | -3.25347800 | -0.72335300 |
| C | 3.77133600  | -3.19139800 | 0.61681300  |
| C | 3.17723700  | -2.27098600 | 1.48741600  |
| C | 1.40414500  | -0.35546900 | 1.72893700  |
| C | 0.82831500  | 0.53933300  | 0.58955300  |
| H | 2.08749300  | -2.44781000 | -2.25455800 |
| H | 3.84951600  | -3.96860900 | -1.39258600 |
| H | 4.54660000  | -3.85847100 | 0.98440700  |
| H | 3.48846800  | -2.22081200 | 2.52810000  |
| H | 1.99925800  | 0.21697000  | 2.44865700  |
| H | 0.56029800  | -0.80210500 | 2.26722100  |
| O | -0.49231300 | 0.99637700  | 0.88248700  |
| C | 1.73607900  | 1.73620100  | 0.27497900  |
| C | 1.16464200  | 2.94927000  | -0.13855900 |
| C | 3.13413600  | 1.66708500  | 0.38657400  |
| C | 1.96095000  | 4.05925800  | -0.42563700 |
| H | 0.08613900  | 3.01934900  | -0.23111700 |
| C | 3.93139200  | 2.77519100  | 0.09509500  |
| H | 3.61183700  | 0.74454400  | 0.69921100  |
| C | 3.34915600  | 3.97747300  | -0.31069300 |
| H | 1.49258300  | 4.98853900  | -0.73954900 |
| H | 5.01117400  | 2.69695800  | 0.19115900  |
| H | 3.97084400  | 4.84061500  | -0.53284200 |
| C | 0.69600600  | -0.47061800 | -0.64681300 |
| C | 0.82914600  | 0.18850000  | -2.02652600 |
| H | 1.83446300  | 0.59687900  | -2.15519800 |
| H | 0.10495500  | 0.99649700  | -2.15208000 |
| H | 0.65074400  | -0.54327600 | -2.82055600 |
| C | -0.66734200 | -1.18758500 | -0.48297400 |
| O | -0.88338700 | -2.05386500 | 0.34175200  |

|   |             |             |             |
|---|-------------|-------------|-------------|
| O | -1.58115200 | -0.75360500 | -1.37014200 |
| C | -2.90558700 | -1.36203500 | -1.31555000 |
| H | -3.23093800 | -1.37997600 | -2.35767200 |
| H | -2.79861600 | -2.38265500 | -0.94507000 |
| C | -3.85743700 | -0.55871200 | -0.46511300 |
| C | -4.65871800 | 0.43193000  | -1.04638500 |
| C | -3.95255700 | -0.78762300 | 0.91487700  |
| C | -5.54038300 | 1.18251000  | -0.26675300 |
| H | -4.59384600 | 0.61349500  | -2.11684700 |
| C | -4.83345000 | -0.03879000 | 1.69578200  |
| H | -3.32672600 | -1.54951800 | 1.36982600  |
| C | -5.62908800 | 0.94759300  | 1.10696400  |
| H | -6.15893800 | 1.94576300  | -0.73129700 |
| H | -4.90166100 | -0.22724300 | 2.76395400  |
| H | -6.31746800 | 1.52788800  | 1.71567800  |
| H | -0.43698800 | 1.58685600  | 1.65179700  |

## TS1

|    |             |             |             |
|----|-------------|-------------|-------------|
| C  | 1.72461800  | 0.89998500  | 1.08903400  |
| C  | 2.19690300  | 1.38892200  | -0.13940900 |
| C  | 2.71857100  | -1.70881400 | 0.66026200  |
| C  | 3.64033700  | 1.38292800  | -0.61001400 |
| C  | 3.41311500  | -1.14790400 | -0.43044900 |
| C  | 4.36239300  | 0.04346400  | -0.33609400 |
| H  | 0.73917500  | 1.24075900  | 1.40341400  |
| H  | 1.54807000  | 2.08748300  | -0.66711300 |
| H  | 3.63166900  | 1.56778000  | -1.69062500 |
| H  | 3.55668400  | -1.78977900 | -1.29926800 |
| H  | 2.38714300  | -2.74155800 | 0.55125000  |
| H  | 4.19803800  | 2.21993800  | -0.16108100 |
| H  | 5.17105200  | -0.08418100 | -1.06429300 |
| H  | 4.84308700  | 0.05888900  | 0.64765300  |
| C  | 2.60970500  | 0.33111000  | 2.19377000  |
| H  | 2.17688300  | 0.58858000  | 3.16692600  |
| H  | 3.59407000  | 0.81022300  | 2.16654000  |
| C  | 2.75015800  | -1.20504200 | 2.09158800  |
| H  | 3.66569700  | -1.54425900 | 2.60147100  |
| H  | 1.91474800  | -1.67674800 | 2.62209200  |
| Rh | 1.34212200  | -0.55373100 | -0.49129100 |
| O  | 0.45039500  | -2.13920700 | -1.59935800 |
| H  | 0.93625000  | -2.27098000 | -2.42986000 |
| C  | -4.31418000 | -2.18204600 | -0.29514200 |
| C  | -3.40119000 | -1.18941000 | -0.62909800 |

|   |             |             |             |
|---|-------------|-------------|-------------|
| C | -2.28596600 | -0.91450200 | 0.15894200  |
| C | -1.99835000 | -1.62329900 | 1.31943700  |
| C | -2.90823000 | -2.63603000 | 1.66356700  |
| C | -4.03954000 | -2.90542100 | 0.87697400  |
| H | -5.19069500 | -2.40856500 | -0.89686300 |
| H | -1.12398200 | -1.42445900 | 1.93378400  |
| H | -2.73699000 | -3.22733100 | 2.55956900  |
| H | -4.71559100 | -3.69970400 | 1.18378800  |
| C | -1.78716500 | 0.20988500  | -0.76384300 |
| C | -3.06840200 | -0.13373300 | -1.66916600 |
| H | -2.78858400 | -0.51122800 | -2.65869300 |
| H | -3.78881000 | 0.68356200  | -1.78590100 |
| O | -0.56677600 | -0.03432400 | -1.43651500 |
| H | -0.34084200 | -1.16757900 | -1.71231900 |
| C | -1.79452500 | 1.62885400  | -0.21428500 |
| C | -1.29665500 | 2.67380500  | -1.01016800 |
| C | -2.32292400 | 1.94099900  | 1.04453400  |
| C | -1.32470600 | 3.99255200  | -0.55689200 |
| H | -0.88426400 | 2.44178200  | -1.98725500 |
| C | -2.35047500 | 3.26293100  | 1.50095100  |
| H | -2.71542500 | 1.14807900  | 1.67413400  |
| C | -1.85201700 | 4.29313600  | 0.70310800  |
| H | -0.93604000 | 4.78775400  | -1.18813200 |
| H | -2.76140800 | 3.48310000  | 2.48295700  |
| H | -1.87323500 | 5.32035300  | 1.05726500  |

## TS2

|   |             |             |             |
|---|-------------|-------------|-------------|
| C | -2.29274300 | -1.67864300 | -1.04540700 |
| C | -2.32667000 | -0.39363400 | -1.66546100 |
| C | -2.59069100 | -0.59732600 | 1.55636300  |
| C | -3.45983000 | 0.61232200  | -1.56774300 |
| C | -2.86588800 | 0.61555700  | 0.91074000  |
| C | -3.97310800 | 0.80364800  | -0.12260700 |
| H | -1.62436700 | -2.41046400 | -1.49953400 |
| H | -1.68112000 | -0.26466200 | -2.53304900 |
| H | -3.07810800 | 1.57034100  | -1.94222400 |
| H | -2.49673200 | 1.52379500  | 1.38408500  |
| H | -2.05179000 | -0.54960500 | 2.50276300  |
| H | -4.28756000 | 0.33076700  | -2.23866400 |
| H | -4.39599400 | 1.80890500  | -0.01876600 |
| H | -4.79447000 | 0.10989400  | 0.08737700  |
| C | -3.43808600 | -2.25287800 | -0.21029800 |
| H | -3.46085800 | -3.34180900 | -0.33346900 |

|    |             |             |             |
|----|-------------|-------------|-------------|
| H  | -4.39577500 | -1.88747300 | -0.59806400 |
| C  | -3.29942200 | -1.91869600 | 1.29493200  |
| H  | -4.28592900 | -1.93476500 | 1.78339400  |
| H  | -2.71038100 | -2.70718000 | 1.77999000  |
| Rh | -1.07838500 | -0.31448600 | 0.01790300  |
| C  | 0.94868100  | 3.67151300  | -0.60533200 |
| C  | 1.22207600  | 2.33417000  | -0.85466900 |
| C  | 1.08064500  | 1.35666700  | 0.13609400  |
| C  | 0.67172100  | 1.65846100  | 1.43532100  |
| C  | 0.36655200  | 3.00977500  | 1.68513600  |
| C  | 0.50105600  | 3.98767300  | 0.69039500  |
| H  | 1.07407500  | 4.45110300  | -1.35365800 |
| H  | 0.61110400  | 0.90881000  | 2.21910000  |
| H  | 0.03621200  | 3.30685500  | 2.67733900  |
| H  | 0.26661800  | 5.02161300  | 0.93471300  |
| C  | 1.54006700  | 0.20313500  | -0.81300600 |
| C  | 1.74485000  | 1.36887400  | -1.90457700 |
| H  | 1.11578300  | 1.21783400  | -2.78638100 |
| H  | 2.78096800  | 1.53671300  | -2.21844000 |
| O  | 0.53614300  | -0.69113700 | -1.14181500 |
| C  | 2.83367500  | -0.50930900 | -0.40806300 |
| C  | 3.91142900  | 0.18581800  | 0.16602900  |
| C  | 2.96877300  | -1.88904200 | -0.62578300 |
| C  | 5.08940100  | -0.47772600 | 0.50641200  |
| H  | 3.82452300  | 1.25359800  | 0.35023300  |
| C  | 4.15025500  | -2.55566200 | -0.28278400 |
| H  | 2.13797300  | -2.42448000 | -1.07449300 |
| C  | 5.21395100  | -1.85290200 | 0.28353700  |
| H  | 5.90957000  | 0.07928800  | 0.95291200  |
| H  | 4.23580100  | -3.62454000 | -0.46254100 |
| H  | 6.13166800  | -2.36966900 | 0.55439100  |
| O  | 0.72457200  | -1.53927800 | 1.98360000  |
| H  | 0.13333200  | -2.20487000 | 1.59047100  |
| H  | 1.46687100  | -1.49559700 | 1.34722900  |

### TS3

|   |             |             |             |
|---|-------------|-------------|-------------|
| C | -2.63426200 | 1.12205500  | 0.34778900  |
| C | -2.29310900 | 0.41925800  | 1.51518800  |
| C | -2.59607000 | -1.21264000 | -1.27969800 |
| C | -3.05856300 | -0.74509100 | 2.11965800  |
| C | -2.50508000 | -1.92610700 | -0.07290200 |
| C | -3.49868900 | -1.79744600 | 1.07517700  |
| H | -2.19399700 | 2.11073000  | 0.22654200  |

|    |             |             |             |
|----|-------------|-------------|-------------|
| H  | -1.63953700 | 0.93318000  | 2.21785100  |
| H  | -2.39817500 | -1.22685100 | 2.85091900  |
| H  | -1.90617100 | -2.83583100 | -0.08491100 |
| H  | -2.07155100 | -1.63078200 | -2.13816900 |
| H  | -3.93078200 | -0.38522600 | 2.68864700  |
| H  | -3.60525700 | -2.77005700 | 1.56875100  |
| H  | -4.48954300 | -1.55026000 | 0.67920200  |
| C  | -3.88624200 | 0.85317900  | -0.48447800 |
| H  | -4.23496800 | 1.79558900  | -0.92173800 |
| H  | -4.69565300 | 0.50854200  | 0.16831900  |
| C  | -3.64125900 | -0.16720500 | -1.62223800 |
| H  | -4.58887800 | -0.64787700 | -1.91316600 |
| H  | -3.28737100 | 0.36789400  | -2.51121000 |
| Rh | -1.04502300 | -0.30115600 | -0.09902200 |
| C  | 1.45371000  | 3.22072600  | -0.85102200 |
| C  | 1.16474300  | 1.86094500  | -0.94614100 |
| C  | 0.78393900  | 1.09443500  | 0.17304300  |
| C  | 0.81477100  | 1.68286700  | 1.44881600  |
| C  | 1.07105200  | 3.05450800  | 1.55142100  |
| C  | 1.36239600  | 3.81935400  | 0.41159000  |
| H  | 1.77640300  | 3.79787400  | -1.71438400 |
| H  | 0.62753900  | 1.10185400  | 2.34802400  |
| H  | 1.05427600  | 3.53492900  | 2.52682700  |
| H  | 1.56693200  | 4.88151800  | 0.52020200  |
| C  | 1.38869900  | -0.36561500 | -0.93505600 |
| C  | 1.45183400  | 0.80080400  | -1.97485300 |
| H  | 0.68457800  | 0.66220700  | -2.74371000 |
| H  | 2.42688300  | 0.89634400  | -2.46614600 |
| O  | 0.45871600  | -1.27690100 | -1.10340600 |
| C  | 2.69442600  | -0.84844500 | -0.33836500 |
| C  | 3.81977000  | -0.01817700 | -0.21528200 |
| C  | 2.78954500  | -2.18078900 | 0.08562500  |
| C  | 5.01117600  | -0.51229400 | 0.31401200  |
| H  | 3.76419500  | 1.02437100  | -0.51608300 |
| C  | 3.98221700  | -2.67487900 | 0.61657100  |
| H  | 1.92082600  | -2.82220900 | -0.01810400 |
| C  | 5.09777600  | -1.84341600 | 0.73275900  |
| H  | 5.87293500  | 0.14456600  | 0.40311400  |
| H  | 4.03976400  | -3.71247400 | 0.93664500  |
| H  | 6.02717300  | -2.22696500 | 1.14614600  |

**Re\_TS4**

|   |            |            |             |
|---|------------|------------|-------------|
| C | 1.91706100 | 0.98562100 | -1.60892000 |
|---|------------|------------|-------------|

|    |             |             |             |
|----|-------------|-------------|-------------|
| C  | 2.46196600  | 1.69878100  | -0.55929000 |
| C  | 1.37529700  | 1.58416100  | -2.89654700 |
| C  | 2.55205800  | 3.20545900  | -0.43432300 |
| C  | -0.64494400 | 2.36256400  | -1.52094900 |
| C  | -0.00822500 | 3.25107500  | -0.66169200 |
| C  | -0.14352600 | 1.86045300  | -2.85643700 |
| C  | 1.30730400  | 3.96680000  | -0.94545700 |
| H  | 1.92033200  | 2.50331900  | -3.13332100 |
| H  | 1.58358100  | 0.89148900  | -3.72044100 |
| H  | 3.45311100  | 3.57653600  | -0.94925500 |
| H  | 2.69764300  | 3.43736000  | 0.62765200  |
| H  | -0.68025400 | 0.93120300  | -3.08254300 |
| H  | -0.41424000 | 2.56858600  | -3.65658300 |
| H  | 1.28033300  | 4.95100400  | -0.46372800 |
| H  | 1.39792300  | 4.16387100  | -2.01876500 |
| H  | -0.62284300 | 3.69771100  | 0.11610300  |
| H  | 3.10873100  | 1.14911700  | 0.11937200  |
| H  | -1.70871600 | 2.20898100  | -1.35752600 |
| H  | 2.12729900  | -0.07952500 | -1.64527400 |
| Rh | 0.31883200  | 1.15420200  | 0.12160200  |
| C  | -2.67422700 | 0.67363100  | 0.80318100  |
| C  | -1.45548500 | 1.30398800  | 1.16331600  |
| C  | -1.48012700 | 2.14777000  | 2.29379400  |
| C  | -2.63576800 | 2.35565300  | 3.05247900  |
| C  | -3.82621500 | 1.72912100  | 2.68059500  |
| C  | -3.83788600 | 0.89960800  | 1.55997000  |
| C  | -2.74678700 | -0.22321200 | -0.43454600 |
| C  | -3.53371000 | -1.51692400 | -0.22682900 |
| H  | -0.56677700 | 2.66018300  | 2.59368100  |
| H  | -2.60602000 | 3.00638300  | 3.92417800  |
| H  | -4.73680600 | 1.88311300  | 3.25412900  |
| H  | -4.77016600 | 0.41897000  | 1.27110100  |
| H  | -3.14467300 | 0.33796100  | -1.28806700 |
| H  | -1.72703700 | -0.51897500 | -0.70363200 |
| O  | -3.00755700 | -2.45907000 | 0.35498800  |
| C  | -4.93765600 | -1.65005700 | -0.74210500 |
| C  | -5.56938000 | -2.89965700 | -0.60937900 |
| C  | -5.64522400 | -0.59307900 | -1.33820000 |
| C  | -6.86940700 | -3.09029300 | -1.06621700 |
| H  | -5.01513000 | -3.70760100 | -0.14353800 |
| C  | -6.95221800 | -0.78259100 | -1.79074200 |
| H  | -5.18962000 | 0.38598300  | -1.44206200 |
| C  | -7.56474700 | -2.03026900 | -1.65917000 |
| H  | -7.34473900 | -4.06164400 | -0.96087600 |

|   |             |             |             |
|---|-------------|-------------|-------------|
| H | -7.49012500 | 0.04409400  | -2.24615000 |
| H | -8.58073100 | -2.17745000 | -2.01553500 |
| C | 1.05016700  | -0.37488400 | 1.31941100  |
| C | 1.80757200  | 0.06387500  | 2.56924200  |
| H | 1.20320400  | 0.75242000  | 3.16492300  |
| H | 2.14470700  | -0.76802500 | 3.19916400  |
| H | 2.69735700  | 0.60467900  | 2.23475200  |
| C | 1.64479900  | -1.54649300 | 0.57794900  |
| O | 1.03728200  | -2.49707500 | 0.12447500  |
| O | 2.97766500  | -1.37100800 | 0.43491300  |
| C | 3.66871200  | -2.39012700 | -0.35100100 |
| H | 3.25357500  | -2.38285400 | -1.36274200 |
| H | 3.45794900  | -3.36397100 | 0.09750400  |
| C | 5.13712900  | -2.06853300 | -0.33992900 |
| C | 5.69216100  | -1.23461900 | -1.31982900 |
| C | 5.96886700  | -2.59010900 | 0.65975700  |
| C | 7.05318400  | -0.92570000 | -1.30022500 |
| H | 5.05538200  | -0.82795000 | -2.10185000 |
| C | 7.33022700  | -2.28314500 | 0.68196400  |
| H | 5.54724900  | -3.24186900 | 1.42129800  |
| C | 7.87447100  | -1.44982300 | -0.29865500 |
| H | 7.47268000  | -0.28102500 | -2.06767400 |
| H | 7.96559900  | -2.69678300 | 1.46025700  |
| H | 8.93493000  | -1.21332500 | -0.28492400 |
| N | -0.27357000 | -1.26501400 | 2.08311000  |
| N | -1.29827500 | -1.42186100 | 2.48345400  |

#### Si\_TS4

|   |             |            |             |
|---|-------------|------------|-------------|
| C | -0.53289600 | 3.08699600 | -1.17668600 |
| C | 0.83661800  | 3.00354900 | -1.03917200 |
| C | -1.43984500 | 4.02956200 | -0.40133300 |
| C | 1.69889800  | 3.74925300 | -0.04322900 |
| C | -1.08120400 | 2.48135900 | 1.61848400  |
| C | 0.28649100  | 2.66311400 | 1.80459800  |
| C | -2.02745700 | 3.40992200 | 0.88643700  |
| C | 1.08109100  | 3.88590600 | 1.36578600  |
| H | -0.89251600 | 4.94672200 | -0.16153400 |
| H | -2.26674300 | 4.33669400 | -1.05246600 |
| H | 1.95534200  | 4.74625000 | -0.43677500 |
| H | 2.64808000  | 3.20579700 | 0.03669300  |
| H | -2.92461000 | 2.83399800 | 0.62713700  |
| H | -2.37095500 | 4.21130700 | 1.56077700  |
| H | 1.88991400  | 4.05486300 | 2.08611300  |



|    |             |             |             |
|----|-------------|-------------|-------------|
| H  | 0.44689900  | 4.77714800  | 1.41700800  |
| H  | 0.75555300  | 2.05501000  | 2.57397800  |
| H  | 1.38554900  | 2.55093800  | -1.85837200 |
| H  | -1.57449900 | 1.78195300  | 2.28947500  |
| H  | -0.96725400 | 2.65360300  | -2.07443100 |
| Rh | -0.03038600 | 1.16950700  | 0.13641900  |
| C  | -1.35043600 | -0.99450100 | 1.89835300  |
| C  | -0.15311000 | -0.32553800 | 1.54446800  |
| C  | 1.01695500  | -0.68509300 | 2.24846200  |
| C  | 1.01592700  | -1.65843500 | 3.25187200  |
| C  | -0.17487700 | -2.30512100 | 3.58916900  |
| C  | -1.34475000 | -1.96884400 | 2.91045700  |
| C  | -2.67040500 | -0.66561300 | 1.23112800  |
| C  | -3.22543800 | -1.74273700 | 0.29875300  |
| H  | 1.95627600  | -0.18965700 | 2.00900400  |
| H  | 1.93990500  | -1.90387600 | 3.77168100  |
| H  | -0.19312500 | -3.06032000 | 4.37100100  |
| H  | -2.27675100 | -2.46853200 | 3.17115000  |
| H  | -3.43942700 | -0.44431300 | 1.98441600  |
| H  | -2.55712600 | 0.24922400  | 0.63077600  |
| O  | -2.57000400 | -2.72739500 | -0.01709100 |
| C  | -4.61008000 | -1.55593500 | -0.25766800 |
| C  | -5.13544500 | -2.57300700 | -1.07264100 |
| C  | -5.39018500 | -0.41535600 | -0.00651100 |
| C  | -6.41003200 | -2.45690300 | -1.61992700 |
| H  | -4.52277900 | -3.44840600 | -1.26122600 |
| C  | -6.66630700 | -0.29679600 | -0.55911600 |
| H  | -5.00845700 | 0.38668500  | 0.61658500  |
| C  | -7.17892600 | -1.31665500 | -1.36409500 |
| H  | -6.80637400 | -3.25208500 | -2.24534000 |
| H  | -7.26018000 | 0.59077600  | -0.35963200 |
| H  | -8.17403700 | -1.22405000 | -1.79072400 |
| C  | 0.29339700  | -0.12633600 | -1.46939800 |
| C  | -0.80607700 | -0.28609400 | -2.51198500 |
| H  | -1.76398200 | -0.53109900 | -2.05025900 |
| H  | -0.90287800 | 0.68029400  | -3.01439900 |
| H  | -0.57240600 | -1.02886000 | -3.28362300 |
| C  | 1.65110100  | 0.05164100  | -2.10236400 |
| O  | 1.80984300  | 0.71579400  | -3.11408900 |
| O  | 2.66030900  | -0.51208600 | -1.41458100 |
| C  | 3.99543400  | -0.30294100 | -1.96364700 |
| H  | 4.17771100  | 0.77322700  | -2.02088300 |
| H  | 4.01330000  | -0.70807800 | -2.97941900 |
| C  | 4.98193600  | -0.99201000 | -1.06248200 |

|   |            |             |             |
|---|------------|-------------|-------------|
| C | 5.64705400 | -0.27687000 | -0.05842700 |
| C | 5.24067400 | -2.36164500 | -1.20809900 |
| C | 6.55422300 | -0.91805000 | 0.78735900  |
| H | 5.45613500 | 0.78748000  | 0.05763800  |
| C | 6.14485500 | -3.00571800 | -0.36300500 |
| H | 4.73209200 | -2.92341700 | -1.98803500 |
| C | 6.80372100 | -2.28401400 | 0.63627700  |
| H | 7.06666400 | -0.35183400 | 1.56022000  |
| H | 6.33883400 | -4.06762500 | -0.48632900 |
| H | 7.51130800 | -2.78402000 | 1.29201200  |
| N | 0.41346300 | -2.60687800 | -0.16150900 |
| N | 0.45243300 | -1.78693000 | -0.91218900 |

### Re\_TS5

|    |             |             |             |
|----|-------------|-------------|-------------|
| C  | -3.17010700 | -0.90736400 | -1.95544200 |
| C  | -3.51857500 | -1.89825800 | -1.02757100 |
| C  | -4.10149400 | 0.19801600  | -2.44241200 |
| C  | -4.83657200 | -2.02324600 | -0.29097200 |
| C  | -3.78477000 | 1.28632700  | -0.12768800 |
| C  | -4.35307200 | 0.31091700  | 0.66088000  |
| C  | -4.01694600 | 1.50249500  | -1.60936200 |
| C  | -5.41506000 | -0.67649000 | 0.20334800  |
| H  | -5.13310600 | -0.16946800 | -2.46440200 |
| H  | -3.84828400 | 0.43740900  | -3.48140400 |
| H  | -5.58143200 | -2.53797700 | -0.91957300 |
| H  | -4.66940200 | -2.67768800 | 0.57341500  |
| H  | -3.18394400 | 2.10558500  | -1.98905700 |
| H  | -4.92519700 | 2.10446100  | -1.77273700 |
| H  | -6.09680400 | -0.87266900 | 1.03929400  |
| H  | -6.02589600 | -0.21811900 | -0.58040800 |
| H  | -4.21685300 | 0.40123300  | 1.73680100  |
| H  | -2.93779200 | -2.81984800 | -1.05112600 |
| H  | -3.28275300 | 2.10279900  | 0.38737600  |
| H  | -2.32148400 | -1.12028800 | -2.60226900 |
| Rh | -2.23502300 | -0.44153600 | -0.00825400 |
| C  | -0.36169200 | 1.67209800  | 1.47665300  |
| C  | -0.89703600 | 0.35769200  | 1.58725400  |
| C  | -0.96726500 | -0.21348100 | 2.86967700  |
| C  | -0.55783900 | 0.46274900  | 4.02217200  |
| C  | -0.05421100 | 1.75513000  | 3.90817000  |
| C  | 0.02449000  | 2.34651000  | 2.64567300  |
| C  | -0.35029100 | 2.47556400  | 0.17392600  |
| C  | 0.68764000  | 2.17829500  | -0.91971900 |

|   |             |             |             |
|---|-------------|-------------|-------------|
| H | -1.36925000 | -1.21478200 | 2.98546100  |
| H | -0.64254500 | -0.01575700 | 4.99473000  |
| H | 0.26158800  | 2.30971500  | 4.78786700  |
| H | 0.36640600  | 3.37709900  | 2.57378700  |
| H | -0.26169300 | 3.53839900  | 0.42961700  |
| H | -1.30785800 | 2.33403500  | -0.32964100 |
| O | 0.34613200  | 1.56113000  | -1.92147000 |
| C | 2.07368100  | 2.74624200  | -0.83680000 |
| C | 2.83754100  | 2.78388600  | -2.01677400 |
| C | 2.63349200  | 3.23908200  | 0.35150200  |
| C | 4.12683200  | 3.30846800  | -2.01016500 |
| H | 2.39578900  | 2.39934800  | -2.93009600 |
| C | 3.93207700  | 3.75109600  | 0.36110000  |
| H | 2.07011600  | 3.20089500  | 1.27555100  |
| C | 4.67853000  | 3.79194200  | -0.81876000 |
| H | 4.70371500  | 3.34095000  | -2.93027300 |
| H | 4.35914900  | 4.11974900  | 1.28954400  |
| H | 5.68613300  | 4.19871600  | -0.81106600 |
| C | -0.55659300 | -1.33622500 | 0.22144500  |
| C | -0.43380600 | -2.61788800 | 1.02203900  |
| H | -1.32018900 | -2.83988100 | 1.61773000  |
| H | 0.45776700  | -2.63328200 | 1.66253700  |
| H | -0.31216800 | -3.42488600 | 0.28442300  |
| C | 0.69832200  | -1.16225300 | -0.57439800 |
| O | 0.78290800  | -1.65341300 | -1.68668300 |
| O | 1.71111200  | -0.56732700 | 0.08009400  |
| C | 3.01431800  | -0.58417100 | -0.58718100 |
| H | 2.85636600  | -0.44822200 | -1.65743100 |
| H | 3.52248600  | 0.28916200  | -0.17832600 |
| C | 3.76900900  | -1.85407400 | -0.28469100 |
| C | 3.76722600  | -2.92547600 | -1.18846100 |
| C | 4.48133200  | -1.97911000 | 0.91660700  |
| C | 4.46744500  | -4.09795400 | -0.89730700 |
| H | 3.20864400  | -2.83720100 | -2.11536400 |
| C | 5.17776500  | -3.15186100 | 1.21149800  |
| H | 4.49233000  | -1.15053600 | 1.62111200  |
| C | 5.17262900  | -4.21392900 | 0.30309600  |
| H | 4.46227300  | -4.92024600 | -1.60777700 |
| H | 5.72827200  | -3.23490400 | 2.14478100  |
| H | 5.71846200  | -5.12617500 | 0.52879800  |

### Si\_TS5

|   |            |             |             |
|---|------------|-------------|-------------|
| C | 3.00252600 | -1.96656200 | -1.66285800 |
|---|------------|-------------|-------------|

|    |             |             |             |
|----|-------------|-------------|-------------|
| C  | 2.15642800  | -3.06320400 | -1.45990700 |
| C  | 4.40224300  | -1.81274700 | -1.07806200 |
| C  | 2.42936400  | -4.26125400 | -0.57352700 |
| C  | 3.25061500  | -1.38479500 | 1.18392300  |
| C  | 2.66533400  | -2.61451800 | 1.37940200  |
| C  | 4.42835300  | -1.07386500 | 0.28296000  |
| C  | 3.12984400  | -3.92483800 | 0.76594800  |
| H  | 4.87645600  | -2.79516100 | -0.98405700 |
| H  | 5.02104300  | -1.25148000 | -1.78787100 |
| H  | 3.02086900  | -5.01367600 | -1.12011800 |
| H  | 1.46315000  | -4.73373000 | -0.36086500 |
| H  | 4.42515400  | 0.00707200  | 0.09701600  |
| H  | 5.37615300  | -1.28650400 | 0.80317100  |
| H  | 2.92994300  | -4.73583700 | 1.47587700  |
| H  | 4.21574200  | -3.90586600 | 0.63112500  |
| H  | 1.94159500  | -2.69581400 | 2.18754900  |
| H  | 1.36503600  | -3.22544800 | -2.18920500 |
| H  | 2.97988600  | -0.59258600 | 1.88001400  |
| H  | 2.79416000  | -1.34538400 | -2.53208700 |
| Rh | 1.39530100  | -1.42967200 | -0.21367100 |
| C  | 0.13425500  | 0.74571500  | 1.74844400  |
| C  | -0.06037900 | -0.53135100 | 1.17580100  |
| C  | -0.96805200 | -1.41225100 | 1.79613400  |
| C  | -1.63939800 | -1.06739400 | 2.97029000  |
| C  | -1.43498200 | 0.19493400  | 3.53377000  |
| C  | -0.55503500 | 1.08690600  | 2.92228900  |
| C  | 1.12242000  | 1.73995400  | 1.17760100  |
| C  | 0.50470400  | 3.02638900  | 0.62085600  |
| H  | -1.14720700 | -2.39134700 | 1.35834900  |
| H  | -2.31720000 | -1.77653800 | 3.43958700  |
| H  | -1.95759200 | 0.48375300  | 4.44192900  |
| H  | -0.39329500 | 2.06694600  | 3.36539200  |
| H  | 1.84406600  | 2.03855000  | 1.95264900  |
| H  | 1.72050900  | 1.25982800  | 0.39250700  |
| O  | -0.69925900 | 3.23602800  | 0.67448000  |
| C  | 1.42368500  | 4.03914500  | 0.00133500  |
| C  | 0.85540900  | 5.21603100  | -0.51512900 |
| C  | 2.81434000  | 3.86054800  | -0.08295900 |
| C  | 1.65627600  | 6.19093200  | -1.10279300 |
| H  | -0.21982200 | 5.34260100  | -0.44392000 |
| C  | 3.61705700  | 4.83840400  | -0.67199700 |
| H  | 3.27930800  | 2.96244600  | 0.31042700  |
| C  | 3.04036500  | 6.00359800  | -1.18260200 |
| H  | 1.20560300  | 7.09659500  | -1.49913700 |

|   |             |             |             |
|---|-------------|-------------|-------------|
| H | 4.69160700  | 4.69037300  | -0.73168900 |
| H | 3.66680000  | 6.76380700  | -1.64133900 |
| C | -0.18293000 | -0.71044500 | -1.02558800 |
| C | -0.31952500 | 0.62975900  | -1.69987200 |
| H | 0.59700100  | 1.21895900  | -1.65471000 |
| H | -0.54908200 | 0.44382500  | -2.76099900 |
| H | -1.15422200 | 1.21555100  | -1.29791100 |
| C | -1.43473400 | -1.55483900 | -1.17017800 |
| O | -1.42738800 | -2.73928600 | -1.45588200 |
| O | -2.56948500 | -0.85036800 | -0.98899900 |
| C | -3.80899300 | -1.60634300 | -1.05391200 |
| H | -3.72865800 | -2.44226700 | -0.35099600 |
| H | -3.91656600 | -2.02304000 | -2.05928100 |
| C | -4.94620200 | -0.68322700 | -0.70708300 |
| C | -5.00626100 | -0.07391200 | 0.55507000  |
| C | -5.96625600 | -0.43518700 | -1.63194800 |
| C | -6.06727500 | 0.76993400  | 0.88090800  |
| H | -4.21441800 | -0.25674800 | 1.27716900  |
| C | -7.03532600 | 0.40278200  | -1.30350300 |
| H | -5.92510500 | -0.90035700 | -2.61403500 |
| C | -7.08648100 | 1.00792700  | -0.04701400 |
| H | -6.10174700 | 1.24041700  | 1.85980200  |
| H | -7.82217300 | 0.58516000  | -2.03042300 |
| H | -7.91480600 | 1.66280700  | 0.20968900  |

## ESi-TS6

|   |            |             |             |
|---|------------|-------------|-------------|
| C | 3.49722000 | -0.93760800 | -1.06164300 |
| C | 3.12470200 | 0.08575900  | -1.99184000 |
| C | 4.82282800 | -0.94179400 | -0.29948100 |
| C | 3.93513200 | 1.32502700  | -2.32323000 |
| C | 3.62948400 | 0.83620500  | 1.08365100  |
| C | 3.48932300 | 1.85151000  | 0.12104200  |
| C | 4.68465200 | -0.25668400 | 1.07542800  |
| C | 4.44109600 | 2.04650800  | -1.05618500 |
| H | 5.59921000 | -0.45470100 | -0.90073700 |
| H | 5.15802300 | -1.97521600 | -0.15783200 |
| H | 4.77342900 | 1.07943900  | -2.99509500 |
| H | 3.28187000 | 2.00302100  | -2.88465200 |
| H | 4.38321900 | -1.00441200 | 1.81781400  |
| H | 5.65201000 | 0.14330400  | 1.41886100  |
| H | 4.54428700 | 3.11801500  | -1.25966700 |
| H | 5.44076100 | 1.69157300  | -0.78265900 |
| H | 2.88976100 | 2.71529500  | 0.40027600  |

|    |             |             |             |
|----|-------------|-------------|-------------|
| H  | 2.42492300  | -0.20977300 | -2.77488900 |
| H  | 3.17281100  | 1.01182100  | 2.05310600  |
| H  | 3.06633700  | -1.92292700 | -1.23866700 |
| Rh | 2.00557800  | 0.31232200  | -0.23335200 |
| C  | -0.70345100 | -2.04388500 | 1.90899400  |
| C  | -0.68316900 | -0.75614000 | 2.51028000  |
| C  | -1.39792400 | -0.60540300 | 3.71875900  |
| C  | -2.11594300 | -1.64411700 | 4.30468700  |
| C  | -2.12716100 | -2.90301000 | 3.70290100  |
| C  | -1.41539800 | -3.08797400 | 2.51957100  |
| C  | 0.16424600  | -2.38275700 | 0.70165000  |
| C  | -0.20288400 | -1.81788100 | -0.66266200 |
| H  | -1.40279200 | 0.36707400  | 4.20139800  |
| H  | -2.66352200 | -1.47029800 | 5.22780500  |
| H  | -2.66445600 | -3.73297400 | 4.15357500  |
| H  | -1.38103400 | -4.08139600 | 2.07645400  |
| H  | 0.20047700  | -3.47380100 | 0.59781000  |
| H  | 1.18297100  | -2.02148700 | 0.89415000  |
| O  | 0.47260700  | -0.89935800 | -1.16330900 |
| C  | -1.29015900 | -2.40221800 | -1.48643400 |
| C  | -1.40026300 | -2.01459100 | -2.83649900 |
| C  | -2.20652600 | -3.33246600 | -0.96708300 |
| C  | -2.39695800 | -2.54988900 | -3.64541200 |
| H  | -0.69177700 | -1.29681200 | -3.23472600 |
| C  | -3.21054200 | -3.85941200 | -1.77805700 |
| H  | -2.15523900 | -3.62626800 | 0.07338000  |
| C  | -3.30562800 | -3.47358500 | -3.11699000 |
| H  | -2.46836000 | -2.24927000 | -4.68664500 |
| H  | -3.91882900 | -4.57062200 | -1.36349100 |
| H  | -4.08580400 | -3.88999900 | -3.74813300 |
| C  | 0.09802900  | 0.39019900  | 1.97135900  |
| C  | 0.86199800  | 1.23080000  | 2.98297100  |
| H  | 1.61721400  | 0.65266700  | 3.53194600  |
| H  | 0.19872600  | 1.67208000  | 3.74444900  |
| H  | 1.35828800  | 2.06799400  | 2.48718400  |
| C  | -0.32135700 | 1.04902100  | 0.79685300  |
| O  | 0.32163900  | 1.96582000  | 0.18867600  |
| O  | -1.53203100 | 0.63058200  | 0.28607500  |
| C  | -1.98306500 | 1.22387900  | -0.95003500 |
| H  | -1.11678100 | 1.59636300  | -1.49914300 |
| H  | -2.44900600 | 0.40979700  | -1.51107900 |
| C  | -2.98352900 | 2.33097900  | -0.70213000 |
| C  | -2.55965500 | 3.58640500  | -0.24005900 |
| C  | -4.34865900 | 2.12081900  | -0.93058500 |

|   |             |            |             |
|---|-------------|------------|-------------|
| C | -3.48449300 | 4.60545800 | -0.01127100 |
| H | -1.50078100 | 3.74930100 | -0.05962600 |
| C | -5.27684900 | 3.14102900 | -0.70586000 |
| H | -4.68759000 | 1.15089700 | -1.28831300 |
| C | -4.84597500 | 4.38617200 | -0.24451800 |
| H | -3.14350800 | 5.57406300 | 0.34551800  |
| H | -6.33318600 | 2.96231800 | -0.88964500 |
| H | -5.56511000 | 5.18195400 | -0.06844200 |

### **ERe-TS6**

|    |             |             |             |
|----|-------------|-------------|-------------|
| C  | -3.49768800 | -0.93849100 | -1.05894500 |
| C  | -3.12476500 | 0.08271400  | -1.99131800 |
| C  | -4.82308000 | -0.94078900 | -0.29638500 |
| C  | -3.93346600 | 1.32244800  | -2.32502100 |
| C  | -3.62890300 | 0.83992400  | 1.08294000  |
| C  | -3.48832400 | 1.85302600  | 0.11816700  |
| C  | -4.68472000 | -0.25238900 | 1.07692700  |
| C  | -4.44018700 | 2.04564000  | -1.05936800 |
| H  | -5.59966300 | -0.45528800 | -0.89866400 |
| H  | -5.15809700 | -1.97389900 | -0.15210600 |
| H  | -4.77104400 | 1.07736500  | -2.99797800 |
| H  | -3.27847900 | 1.99919100  | -2.88597500 |
| H  | -4.38389300 | -0.99852700 | 1.82114000  |
| H  | -5.65193500 | 0.14893800  | 1.41917800  |
| H  | -4.54409900 | 3.11675800  | -1.26458900 |
| H  | -5.43961300 | 1.69042800  | -0.78543500 |
| H  | -2.88778500 | 2.71687300  | 0.39504400  |
| H  | -2.42552500 | -0.21519200 | -2.77394700 |
| H  | -3.17213400 | 1.01724800  | 2.05201000  |
| H  | -3.06760600 | -1.92444200 | -1.23449600 |
| Rh | -2.00529800 | 0.31203200  | -0.23328700 |
| C  | 0.70287100  | -2.04476300 | 1.90804800  |
| C  | 0.68275100  | -0.75716800 | 2.50966000  |
| C  | 1.39761500  | -0.60696600 | 3.71819700  |
| C  | 2.11555900  | -1.64592400 | 4.30375300  |
| C  | 2.12665100  | -2.90462600 | 3.70155300  |
| C  | 1.41477700  | -3.08910900 | 2.51822900  |
| C  | -0.16505400 | -2.38316700 | 0.70076100  |
| C  | 0.20257100  | -1.81790400 | -0.66319300 |
| H  | 1.40262200  | 0.36534900  | 4.20114700  |
| H  | 2.66320500  | -1.47244700 | 5.22689800  |
| H  | 2.66390500  | -3.73479200 | 4.15190500  |
| H  | 1.38017200  | -4.08241500 | 2.07487100  |

|   |             |             |             |
|---|-------------|-------------|-------------|
| H | -0.20199900 | -3.47415600 | 0.59673100  |
| H | -1.18351600 | -2.02123400 | 0.89342500  |
| O | -0.47202000 | -0.89837400 | -1.16325800 |
| C | 1.28992600  | -2.40208600 | -1.48694800 |
| C | 1.40207500  | -2.01192200 | -2.83612600 |
| C | 2.20439800  | -3.33470100 | -0.96849900 |
| C | 2.39891300  | -2.54699300 | -3.64500900 |
| H | 0.69506600  | -1.29233800 | -3.23371100 |
| C | 3.20852300  | -3.86149300 | -1.77943300 |
| H | 2.15154500  | -3.63058200 | 0.07129000  |
| C | 3.30566300  | -3.47307600 | -3.11746700 |
| H | 2.47190100  | -2.24435900 | -4.68554700 |
| H | 3.91529400  | -4.57459700 | -1.36553700 |
| H | 4.08594100  | -3.88933000 | -3.74858900 |
| C | -0.09842900 | 0.38959200  | 1.97142500  |
| C | -0.86185000 | 1.22985200  | 2.98376400  |
| H | -1.61663700 | 0.65142800  | 3.53300600  |
| H | -0.19830100 | 1.67131800  | 3.74491600  |
| H | -1.35861500 | 2.06699400  | 2.48839100  |
| C | 0.32119200  | 1.04942300  | 0.79736800  |
| O | -0.32126200 | 1.96723600  | 0.19039400  |
| O | 1.53163300  | 0.63104700  | 0.28613100  |
| C | 1.98222300  | 1.22506200  | -0.94985500 |
| H | 1.11574500  | 1.59813000  | -1.49824900 |
| H | 2.44764700  | 0.41120100  | -1.51163100 |
| C | 2.98308900  | 2.33171700  | -0.70161800 |
| C | 2.55928200  | 3.58805900  | -0.24196900 |
| C | 4.34851300  | 2.12019000  | -0.92704400 |
| C | 3.48445800  | 4.60667800  | -0.01260000 |
| H | 1.50019300  | 3.75193400  | -0.06368500 |
| C | 5.27704900  | 3.13995600  | -0.70174900 |
| H | 4.68737000  | 1.14957600  | -1.28296200 |
| C | 4.84622500  | 4.38602900  | -0.24287300 |
| H | 3.14353500  | 5.57600300  | 0.34228500  |
| H | 6.33361200  | 2.96020500  | -0.88320500 |
| H | 5.56563100  | 5.18147800  | -0.06639200 |

### ZSi-TS6

|   |             |             |             |
|---|-------------|-------------|-------------|
| C | -2.33878200 | -1.87397700 | -1.90367200 |
| C | -1.55536100 | -0.94075100 | -2.64287200 |
| C | -2.22032300 | -3.38995100 | -2.05307300 |
| C | -0.43379000 | -1.29832900 | -3.60244500 |
| C | -0.17173800 | -2.99938800 | -0.60184200 |



|    |             |             |             |
|----|-------------|-------------|-------------|
| C  | 0.62911700  | -2.24064900 | -1.48863600 |
| C  | -1.26890700 | -3.97393400 | -0.99092100 |
| H  | -1.87931300 | -3.63992300 | -3.06373900 |
| H  | -3.21161700 | -3.84428100 | -1.94729500 |
| H  | -0.84061300 | -1.64792700 | -4.56443700 |
| H  | 0.11563600  | -0.37531500 | -3.82071300 |
| H  | -1.84049900 | -4.19434700 | -0.08227600 |
| H  | -0.83648800 | -4.93082700 | -1.32383500 |
| H  | 1.57715600  | -1.87585400 | -1.09335600 |
| H  | -1.99092600 | 0.04455900  | -2.80231200 |
| H  | 0.23098900  | -3.15656100 | 0.39618800  |
| H  | -3.30142300 | -1.51362900 | -1.54166100 |
| Rh | -0.87840700 | -0.98595700 | -0.65099200 |
| C  | -1.97541200 | 0.11589700  | 2.26764300  |
| C  | -0.99405700 | -0.91852000 | 2.22922700  |
| C  | -1.42315500 | -2.19261700 | 2.70532200  |
| C  | -2.71490000 | -2.44414000 | 3.14744900  |
| C  | -3.66900100 | -1.42339500 | 3.14669600  |
| C  | -3.27769300 | -0.16277000 | 2.70593900  |
| C  | -1.69486000 | 1.53348800  | 1.84843400  |
| C  | -1.96598000 | 1.78072800  | 0.36768800  |
| H  | -0.71533100 | -3.01355400 | 2.71097100  |
| H  | -2.97523900 | -3.44164500 | 3.49390300  |
| H  | -4.68209300 | -1.59885100 | 3.49702100  |
| H  | -3.99773300 | 0.65358700  | 2.72227700  |
| H  | -0.67188800 | 1.83995800  | 2.08639700  |
| H  | -2.35619500 | 2.20669900  | 2.40959300  |
| O  | -2.25403700 | 0.85174200  | -0.40567800 |
| C  | -1.99769700 | 3.17984400  | -0.13815200 |
| C  | -2.35120900 | 3.41052500  | -1.47986700 |
| C  | -1.67442000 | 4.27811600  | 0.67826400  |
| C  | -2.38213700 | 4.70404100  | -1.99183600 |
| H  | -2.60277300 | 2.56088500  | -2.10502900 |
| C  | -1.70107600 | 5.57310500  | 0.16258000  |
| H  | -1.39256500 | 4.12752400  | 1.71477900  |
| C  | -2.05642000 | 5.78907800  | -1.17128500 |
| H  | -2.65920700 | 4.86958200  | -3.02916300 |
| H  | -1.44514700 | 6.41328800  | 0.80165300  |
| H  | -2.07945900 | 6.79933500  | -1.57063600 |
| C  | 0.43604800  | -0.78447600 | 1.86316700  |
| C  | 1.38804200  | -1.72305600 | 2.59210900  |
| H  | 1.06365100  | -1.88508500 | 3.62734800  |
| H  | 2.39830900  | -1.31536000 | 2.61391000  |
| H  | 1.46001600  | -2.72168900 | 2.12897500  |

|   |            |             |             |
|---|------------|-------------|-------------|
| C | 1.01750900 | 0.18227500  | 0.99808000  |
| O | 0.44828800 | 0.90707700  | 0.12892400  |
| O | 2.39234000 | 0.26856200  | 1.09430600  |
| C | 3.05162000 | 1.12509700  | 0.15247000  |
| H | 2.62864400 | 0.95753700  | -0.84438400 |
| H | 2.86520200 | 2.17490400  | 0.40716500  |
| C | 4.53241600 | 0.82610600  | 0.17615400  |
| C | 5.00323400 | -0.49454000 | 0.18009000  |
| C | 5.46118600 | 1.87274500  | 0.14446100  |
| C | 6.37249200 | -0.76010900 | 0.15171800  |
| H | 4.29108800 | -1.31378200 | 0.21819000  |
| C | 6.83313000 | 1.60965400  | 0.10731600  |
| H | 5.10902400 | 2.90190600  | 0.15080700  |
| C | 7.29281100 | 0.29168100  | 0.11202300  |
| H | 6.72242700 | -1.78918900 | 0.16004900  |
| H | 7.54038700 | 2.43457200  | 0.08387000  |
| H | 8.35930600 | 0.08417000  | 0.08935700  |
| C | 0.54345600 | -2.33892000 | -3.01148000 |
| H | 1.54067000 | -2.18449700 | -3.43746100 |
| H | 0.24674200 | -3.35429700 | -3.29644100 |

### ZRe-TS6

|    |             |             |             |
|----|-------------|-------------|-------------|
| C  | 2.86800100  | -1.48949800 | -1.68527700 |
| C  | 1.99006100  | -0.74356200 | -2.52448300 |
| C  | 3.06800600  | -3.00024800 | -1.79385300 |
| C  | 1.05792900  | -1.33023800 | -3.56954700 |
| C  | 0.85173000  | -3.00722100 | -0.55203500 |
| C  | 0.00442700  | -2.43985400 | -1.53305000 |
| C  | 2.15265600  | -3.74749500 | -0.80499000 |
| H  | 2.88335700  | -3.32845300 | -2.82284500 |
| H  | 4.11469200  | -3.24478800 | -1.58188600 |
| H  | 1.61392600  | -1.60243000 | -4.48058700 |
| H  | 0.35907500  | -0.53840500 | -3.86289600 |
| H  | 2.66566500  | -3.83641600 | 0.15938800  |
| H  | 1.95230900  | -4.77614000 | -1.14445200 |
| H  | -1.03065700 | -2.26889500 | -1.23739800 |
| H  | 2.23804000  | 0.30579300  | -2.67780400 |
| H  | 0.39392700  | -3.22626800 | 0.40976700  |
| H  | 3.70081700  | -0.93735700 | -1.25040100 |
| Rh | 1.14612900  | -0.89254100 | -0.60495000 |
| C  | 1.69304500  | 0.45114300  | 2.35535500  |
| C  | 0.94403900  | -0.75988900 | 2.26247400  |
| C  | 1.56528200  | -1.91255100 | 2.82851600  |

|   |             |             |             |
|---|-------------|-------------|-------------|
| C | 2.82941500  | -1.89177100 | 3.40178000  |
| C | 3.55903200  | -0.70113100 | 3.45197200  |
| C | 2.97343200  | 0.44697100  | 2.92694800  |
| C | 1.18150600  | 1.77756800  | 1.86144100  |
| C | 1.54739600  | 2.05589700  | 0.40675400  |
| H | 1.03629000  | -2.85815800 | 2.79998600  |
| H | 3.24445800  | -2.81004400 | 3.81092500  |
| H | 4.54588700  | -0.66357200 | 3.90428600  |
| H | 3.51273100  | 1.39113500  | 2.98028900  |
| H | 0.09911400  | 1.87491500  | 1.98780600  |
| H | 1.63433100  | 2.57725200  | 2.46216600  |
| O | 2.08347700  | 1.19248400  | -0.30798900 |
| C | 1.36168700  | 3.42909700  | -0.13595000 |
| C | 1.79621200  | 3.70828600  | -1.44427900 |
| C | 0.75648000  | 4.45422700  | 0.61230300  |
| C | 1.63238000  | 4.97794600  | -1.98958900 |
| H | 2.26507900  | 2.91570400  | -2.01701600 |
| C | 0.58814500  | 5.72440400  | 0.06271900  |
| H | 0.40756400  | 4.26476300  | 1.62167400  |
| C | 1.02693800  | 5.98972900  | -1.23691300 |
| H | 1.97490200  | 5.18164700  | -3.00023400 |
| H | 0.11547700  | 6.50704700  | 0.64913000  |
| H | 0.89769600  | 6.98117900  | -1.66227200 |
| C | -0.43998100 | -0.92181300 | 1.75876200  |
| C | -1.25405800 | -2.02379000 | 2.42305300  |
| H | -1.02549900 | -2.09126300 | 3.49402900  |
| H | -2.32264600 | -1.84101200 | 2.31440600  |
| H | -1.06211200 | -3.02467500 | 2.00109200  |
| C | -1.10998300 | -0.10492000 | 0.80748300  |
| O | -0.60782500 | 0.70269600  | -0.02920300 |
| O | -2.47660400 | -0.29442600 | 0.76377300  |
| C | -3.18798900 | 0.43418300  | -0.24867200 |
| H | -2.83060000 | 0.14485900  | -1.24269500 |
| H | -2.98436100 | 1.50488500  | -0.13135400 |
| C | -4.66155400 | 0.14181900  | -0.09731600 |
| C | -5.29532200 | 0.27764300  | 1.14659400  |
| C | -5.42709000 | -0.23156500 | -1.20741800 |
| C | -6.66413800 | 0.04321400  | 1.27455600  |
| H | -4.70776300 | 0.55981600  | 2.01581000  |
| C | -6.80076700 | -0.45879200 | -1.08417100 |
| H | -4.94586000 | -0.34615900 | -2.17608400 |
| C | -7.42238900 | -0.32328300 | 0.15792400  |
| H | -7.14140500 | 0.14862800  | 2.24537800  |
| H | -7.38077600 | -0.74803300 | -1.95660400 |

|   |             |             |             |
|---|-------------|-------------|-------------|
| H | -8.48937500 | -0.50372900 | 0.25796300  |
| C | 0.25430800  | -2.53844100 | -3.03766900 |
| H | -0.70800000 | -2.59263900 | -3.55808200 |
| H | 0.77252200  | -3.47727900 | -3.26190500 |

## TS7'RR

|    |             |             |             |
|----|-------------|-------------|-------------|
| C  | 2.56589000  | -2.41271200 | -1.55881500 |
| C  | 3.49793200  | -1.51977800 | -0.96819000 |
| C  | 2.44472500  | -3.88653200 | -1.18307200 |
| C  | 4.46475200  | -1.85288800 | 0.15262500  |
| C  | 1.26408200  | -2.94671900 | 0.88025400  |
| C  | 2.32720500  | -2.25574200 | 1.48389600  |
| C  | 1.38805400  | -4.11738700 | -0.07953000 |
| C  | 3.79801700  | -2.62504100 | 1.31439600  |
| H  | 3.42230300  | -4.26575000 | -0.86558300 |
| H  | 2.17040700  | -4.46271400 | -2.07345300 |
| H  | 5.32946600  | -2.41108300 | -0.23928700 |
| H  | 4.86166800  | -0.90474100 | 0.53344100  |
| H  | 0.40845900  | -4.26190800 | -0.55017800 |
| H  | 1.60297800  | -5.04700100 | 0.47013700  |
| H  | 4.33348400  | -2.40793400 | 2.24513600  |
| H  | 2.07426500  | -1.66513500 | 2.36318800  |
| H  | 3.77393400  | -0.65011300 | -1.56346500 |
| H  | 0.29595100  | -2.84188100 | 1.36472000  |
| H  | 2.19982300  | -2.14462600 | -2.54901600 |
| Rh | 1.57092200  | -1.10044300 | -0.19972500 |
| C  | -1.59652000 | 2.28000200  | -0.58338100 |
| C  | -1.29239700 | 2.00052500  | 0.75780000  |
| C  | -2.05369400 | 2.62261400  | 1.76046300  |
| C  | -3.09836100 | 3.49171500  | 1.43614300  |
| C  | -3.40131200 | 3.75012100  | 0.09748100  |
| C  | -2.64599600 | 3.14434100  | -0.90897900 |
| C  | -0.72957900 | 1.61025900  | -1.61440500 |
| C  | 0.70440600  | 1.41713100  | -1.13962800 |
| H  | -1.83462700 | 2.42023500  | 2.80567300  |
| H  | -3.67416400 | 3.96332000  | 2.22843400  |
| H  | -4.21263900 | 4.42506200  | -0.16187800 |
| H  | -2.86651900 | 3.35288700  | -1.95361000 |
| H  | -0.71130900 | 2.19052500  | -2.54888500 |
| H  | -1.11294100 | 0.61517300  | -1.86416700 |
| O  | 1.32911100  | 0.38396500  | -1.60036600 |
| C  | 1.54466400  | 2.60875700  | -0.79784700 |
| C  | 2.89875800  | 2.41907100  | -0.46265200 |

|   |             |             |             |
|---|-------------|-------------|-------------|
| C | 1.05659700  | 3.92590300  | -0.86736200 |
| C | 3.73052300  | 3.50176100  | -0.19302500 |
| H | 3.28827600  | 1.40869300  | -0.40810500 |
| C | 1.89361600  | 5.01200300  | -0.60432400 |
| H | 0.02327200  | 4.11335400  | -1.13255200 |
| C | 3.23096200  | 4.80652800  | -0.26289000 |
| H | 4.77103300  | 3.33011800  | 0.06974500  |
| H | 1.49611300  | 6.02115400  | -0.67023900 |
| H | 3.87960000  | 5.65313300  | -0.05494700 |
| C | -0.20160400 | 1.01459600  | 1.11092500  |
| C | 0.78703200  | 1.50403800  | 2.15847800  |
| H | 1.22506900  | 2.46018800  | 1.86153500  |
| H | 1.60140200  | 0.78966800  | 2.31011800  |
| H | 0.30567800  | 1.64550900  | 3.13793400  |
| C | -0.79014900 | -0.29458800 | 1.46022100  |
| O | -0.53750400 | -0.95537900 | 2.46705700  |
| O | -1.73941200 | -0.70587600 | 0.55610000  |
| C | -2.55821200 | -1.82745900 | 0.93799400  |
| H | -2.01955700 | -2.76063700 | 0.73879100  |
| H | -2.73565200 | -1.77615500 | 2.01753200  |
| C | -3.84893800 | -1.77729600 | 0.15770000  |
| C | -4.34423800 | -2.92934300 | -0.46320000 |
| C | -4.59205900 | -0.59017400 | 0.08038100  |
| C | -5.56534900 | -2.90423200 | -1.14253800 |
| H | -3.77202900 | -3.85317700 | -0.41519800 |
| C | -5.80649200 | -0.56151000 | -0.60486100 |
| H | -4.20959100 | 0.31165100  | 0.54992400  |
| C | -6.29891700 | -1.71917600 | -1.21584500 |
| H | -5.93692400 | -3.80750800 | -1.61911500 |
| H | -6.37116100 | 0.36545100  | -0.66109500 |
| H | -7.24639000 | -1.69498800 | -1.74755700 |
| H | 3.89084800  | -3.70524900 | 1.15802900  |

## TS7'RS

|   |            |             |             |
|---|------------|-------------|-------------|
| C | 4.06557400 | -0.74928400 | 1.35152000  |
| C | 3.91440900 | 0.64139100  | 1.48748200  |
| C | 5.21761800 | -1.43003900 | 0.61690200  |
| C | 4.82208200 | 1.70754000  | 0.89768900  |
| C | 3.95251800 | -0.68314700 | -1.46767400 |
| C | 4.08309000 | 0.72466500  | -1.32641700 |
| C | 4.85892900 | -1.73305400 | -0.85464300 |
| C | 5.21268600 | 1.41833000  | -0.56914900 |
| H | 6.11705400 | -0.80824800 | 0.67424500  |

|    |             |             |             |
|----|-------------|-------------|-------------|
| H  | 5.46592600  | -2.36627300 | 1.12688000  |
| H  | 5.71917300  | 1.84281100  | 1.52062400  |
| H  | 4.27679600  | 2.65857800  | 0.93769000  |
| H  | 4.32381800  | -2.68916700 | -0.90301600 |
| H  | 5.76827300  | -1.86075300 | -1.46295800 |
| H  | 5.45590600  | 2.36138100  | -1.07154600 |
| H  | 6.12083500  | 0.80866000  | -0.61548000 |
| H  | 3.57365400  | 1.33166100  | -2.07218200 |
| H  | 3.28670700  | 0.98421000  | 2.31274700  |
| H  | 3.36145700  | -1.03069000 | -2.31532500 |
| H  | 3.54483200  | -1.37116200 | 2.07489700  |
| Rh | 2.54492300  | -0.00502800 | -0.03947000 |
| C  | -0.96854200 | -1.89518200 | -0.98402600 |
| C  | -0.61096400 | -1.97031500 | 0.38380900  |
| C  | -0.41785400 | -3.25644400 | 0.93143900  |
| C  | -0.59406600 | -4.41483900 | 0.17312400  |
| C  | -0.96417300 | -4.32045300 | -1.16909600 |
| C  | -1.14844200 | -3.05554200 | -1.73655300 |
| C  | -1.16598600 | -0.53091000 | -1.60809800 |
| C  | -0.10541400 | 0.46542200  | -1.16766100 |
| H  | -0.14565200 | -3.35091100 | 1.97886500  |
| H  | -0.44400600 | -5.38788000 | 0.63367900  |
| H  | -1.09109400 | -5.21496100 | -1.77228600 |
| H  | -1.41718600 | -2.97110500 | -2.78656900 |
| H  | -1.09792800 | -0.61082300 | -2.70213500 |
| H  | -2.16226400 | -0.16697300 | -1.35940900 |
| O  | 1.09820500  | 0.17983700  | -1.50083400 |
| C  | -0.45822600 | 1.87832900  | -0.85914800 |
| C  | 0.48777100  | 2.73753700  | -0.26453600 |
| C  | -1.70773800 | 2.41846200  | -1.22072300 |
| C  | 0.19410800  | 4.07491500  | -0.02660000 |
| H  | 1.46059700  | 2.34294400  | 0.02362300  |
| C  | -1.99845600 | 3.76542200  | -0.99085500 |
| H  | -2.45491700 | 1.80006500  | -1.70593200 |
| C  | -1.05277200 | 4.59793600  | -0.38949100 |
| H  | 0.93691000  | 4.71316000  | 0.44772000  |
| H  | -2.96629400 | 4.16137400  | -1.28854900 |
| H  | -1.28236100 | 5.64318300  | -0.20429500 |
| C  | -0.37516100 | -0.74934000 | 1.18836500  |
| C  | 0.58950000  | -0.89090600 | 2.36628300  |
| H  | 1.46742900  | -1.48633700 | 2.10165400  |
| H  | 0.90962900  | 0.08559900  | 2.73750600  |
| H  | 0.11097700  | -1.39808500 | 3.22139500  |
| C  | -1.45234300 | 0.16787900  | 1.52960800  |

|   |             |             |             |
|---|-------------|-------------|-------------|
| O | -1.37103300 | 1.07752200  | 2.35431400  |
| O | -2.64258800 | -0.06752500 | 0.87345400  |
| C | -3.74226700 | 0.76249400  | 1.27701600  |
| H | -3.54003300 | 1.80651700  | 1.01550300  |
| H | -3.83514300 | 0.71778900  | 2.36893400  |
| C | -4.99962300 | 0.26958100  | 0.59988400  |
| C | -5.97276400 | 1.18750900  | 0.18642800  |
| C | -5.24255200 | -1.09956800 | 0.42110300  |
| C | -7.17027300 | 0.75009200  | -0.38637500 |
| H | -5.79178200 | 2.25318900  | 0.31210600  |
| C | -6.43452600 | -1.53794000 | -0.15916300 |
| H | -4.48764600 | -1.81753400 | 0.72582200  |
| C | -7.40419300 | -0.61534300 | -0.56116600 |
| H | -7.91396000 | 1.47693200  | -0.70321400 |
| H | -6.60761400 | -2.60271100 | -0.29467700 |
| H | -8.33201800 | -0.95804800 | -1.01128300 |

### TS7'SR

|    |             |             |             |
|----|-------------|-------------|-------------|
| C  | -3.21539800 | -0.84529100 | -1.76058500 |
| C  | -2.54370200 | -1.83276100 | -1.02415000 |
| C  | -4.73029700 | -0.67305600 | -1.79026700 |
| C  | -3.19070600 | -2.86342100 | -0.11589200 |
| C  | -4.36763300 | 0.33374900  | 0.52867200  |
| C  | -3.90430900 | -0.81564600 | 1.22218500  |
| C  | -5.22076500 | 0.33514400  | -0.72544400 |
| C  | -4.24582100 | -2.25270800 | 0.83615200  |
| H  | -5.21782100 | -1.64394300 | -1.65139000 |
| H  | -5.03252700 | -0.32207900 | -2.78303300 |
| H  | -3.63537400 | -3.67568500 | -0.71152000 |
| H  | -2.39557800 | -3.32391700 | 0.48136100  |
| H  | -5.18151100 | 1.34686300  | -1.14507800 |
| H  | -6.27645100 | 0.14938200  | -0.47174000 |
| H  | -4.30796700 | -2.86239200 | 1.74417300  |
| H  | -3.62182900 | -0.66359500 | 2.26302700  |
| H  | -1.53210400 | -2.06450600 | -1.35679900 |
| H  | -4.40242800 | 1.26158900  | 1.10058900  |
| H  | -2.65526600 | -0.41005200 | -2.58404900 |
| Rh | -2.33358600 | 0.02401300  | 0.04815200  |
| C  | 1.20790200  | 3.12977400  | 0.48282500  |
| C  | 1.23221800  | 2.35063500  | -0.68714500 |
| C  | 2.29804400  | 2.54790300  | -1.58478800 |
| C  | 3.30559400  | 3.47867800  | -1.32868400 |
| C  | 3.26267400  | 4.25016100  | -0.16519300 |

|   |             |             |             |
|---|-------------|-------------|-------------|
| C | 2.21201900  | 4.07170100  | 0.73536700  |
| C | 0.06957400  | 2.91130600  | 1.45159900  |
| C | -0.43208800 | 1.47727300  | 1.52232000  |
| H | 2.33271700  | 1.96664700  | -2.50244400 |
| H | 4.11758900  | 3.60560000  | -2.04021300 |
| H | 4.04238700  | 4.97776900  | 0.04327500  |
| H | 2.17757700  | 4.65746000  | 1.65144800  |
| H | -0.79936000 | 3.52541700  | 1.18726500  |
| H | 0.37258000  | 3.21668400  | 2.46349700  |
| O | -1.70103900 | 1.32275600  | 1.56365100  |
| C | 0.46144700  | 0.40267000  | 2.05176600  |
| C | -0.09401100 | -0.83115800 | 2.44462600  |
| C | 1.83759200  | 0.60670900  | 2.26562100  |
| C | 0.69760300  | -1.83063200 | 3.00205600  |
| H | -1.15744700 | -0.99757900 | 2.31213400  |
| C | 2.62983300  | -0.39632900 | 2.82394700  |
| H | 2.29950200  | 1.54669100  | 1.99183400  |
| C | 2.06734000  | -1.61990400 | 3.19025500  |
| H | 0.24516000  | -2.77336900 | 3.29819500  |
| H | 3.69132300  | -0.21845200 | 2.97109900  |
| H | 2.68718300  | -2.39980600 | 3.62384100  |
| C | 0.08411400  | 1.44701800  | -1.03822600 |
| C | -1.03516000 | 2.22847900  | -1.72047900 |
| H | -1.47655100 | 2.96720500  | -1.04098900 |
| H | -1.83911100 | 1.58085100  | -2.07904200 |
| H | -0.65518700 | 2.78710600  | -2.59220500 |
| C | 0.43361400  | 0.17715800  | -1.66517800 |
| O | -0.18473000 | -0.40316500 | -2.56340500 |
| O | 1.57802000  | -0.37334100 | -1.14190200 |
| C | 2.00734800  | -1.60860400 | -1.73210200 |
| H | 1.27627100  | -2.39719300 | -1.52094500 |
| H | 2.04097200  | -1.48863600 | -2.82198300 |
| C | 3.36462700  | -1.97424800 | -1.18031800 |
| C | 3.66675400  | -3.31283000 | -0.90298800 |
| C | 4.35593100  | -1.00213900 | -0.98553900 |
| C | 4.93661500  | -3.67949900 | -0.45032400 |
| H | 2.90278600  | -4.07485500 | -1.04091700 |
| C | 5.62213200  | -1.36557600 | -0.52497900 |
| H | 4.12654500  | 0.04047500  | -1.18374600 |
| C | 5.91845200  | -2.70567500 | -0.25911200 |
| H | 5.15419500  | -4.72343600 | -0.24006500 |
| H | 6.38006800  | -0.60100300 | -0.37462600 |
| H | 6.90571300  | -2.98702200 | 0.09768300  |
| H | -5.24193000 | -2.28610200 | 0.38178400  |



## TS7'SS

|    |             |             |             |
|----|-------------|-------------|-------------|
| C  | -2.32026900 | -2.26310800 | 1.48373400  |
| C  | -1.25321200 | -2.94848700 | 0.88062300  |
| C  | -3.78950100 | -2.63795700 | 1.31305900  |
| C  | -1.36979000 | -4.11858300 | -0.08060300 |
| C  | -3.49253600 | -1.53093800 | -0.96910500 |
| C  | -2.55620100 | -2.41950600 | -1.55904700 |
| C  | -4.45865500 | -1.86851100 | 0.15087400  |
| C  | -2.42806900 | -3.89276500 | -1.18341900 |
| H  | -3.87860300 | -3.71852200 | 1.15708000  |
| H  | -4.32625200 | -2.42235100 | 2.24341800  |
| H  | -1.57814200 | -5.05056200 | 0.46763900  |
| H  | -0.38939700 | -4.25579300 | -0.55187300 |
| H  | -4.86006000 | -0.92219800 | 0.53154700  |
| H  | -5.32065200 | -2.43039300 | -0.24179000 |
| H  | -2.15125700 | -4.46750800 | -2.07398300 |
| H  | -3.40348700 | -4.27711700 | -0.86554800 |
| H  | -2.19034400 | -2.14928300 | -2.54873800 |
| H  | -0.28643000 | -2.83974000 | 1.36683300  |
| H  | -3.77154200 | -0.66208900 | -1.56416500 |
| H  | -2.07040600 | -1.67234400 | 2.36380900  |
| Rh | -1.56792500 | -1.10279500 | -0.19900600 |
| C  | 1.58898300  | 2.28394800  | -0.58418100 |
| C  | 1.28562100  | 2.00285300  | 0.75673900  |
| C  | 2.04754600  | 2.62327800  | 1.75989300  |
| C  | 3.09198900  | 3.49281900  | 1.43612500  |
| C  | 3.39412300  | 3.75310700  | 0.09761000  |
| C  | 2.63826100  | 3.14875900  | -0.90926700 |
| C  | 0.72134200  | 1.61529500  | -1.61529700 |
| C  | -0.71051800 | 1.41649700  | -1.13618100 |
| H  | 1.82947100  | 2.41921600  | 2.80497800  |
| H  | 3.66829200  | 3.96329700  | 2.22872300  |
| H  | 4.20532300  | 4.42840000  | -0.16124700 |
| H  | 2.85823100  | 3.35865800  | -1.95374100 |
| H  | 0.69779500  | 2.19958500  | -2.54715000 |
| H  | 1.10725000  | 0.62264000  | -1.87085000 |
| O  | -1.33478700 | 0.38306100  | -1.59825400 |
| C  | -1.55376100 | 2.60650000  | -0.79482000 |
| C  | -2.90830700 | 2.41348100  | -0.46346600 |
| C  | -1.06861400 | 3.92486000  | -0.86160300 |
| C  | -3.74332600 | 3.49395200  | -0.19485000 |
| H  | -3.29571400 | 1.40214900  | -0.41159400 |

|   |             |             |             |
|---|-------------|-------------|-------------|
| C | -1.90882300 | 5.00875500  | -0.59958300 |
| H | -0.03502800 | 4.11515300  | -1.12370300 |
| C | -3.24660100 | 4.79991600  | -0.26190900 |
| H | -4.78417600 | 3.31958000  | 0.06478300  |
| H | -1.51342100 | 6.01887700  | -0.66336600 |
| H | -3.89775300 | 5.64482500  | -0.05489300 |
| C | 0.19637300  | 1.01428300  | 1.10812200  |
| C | -0.79349800 | 1.49977200  | 2.15626100  |
| H | -1.24744900 | 2.44641200  | 1.85300400  |
| H | -1.59574300 | 0.77441500  | 2.31961000  |
| H | -0.30864700 | 1.65825800  | 3.13137800  |
| C | 0.78987700  | -0.29309100 | 1.45833700  |
| O | 0.53959600  | -0.95417800 | 2.46544300  |
| O | 1.74105000  | -0.70058600 | 0.55502000  |
| C | 2.56220200  | -1.82080800 | 0.93605900  |
| H | 2.02556800  | -2.75476900 | 0.73521400  |
| H | 2.73881100  | -1.77059500 | 2.01581800  |
| C | 3.85337300  | -1.76696600 | 0.15672100  |
| C | 4.35293500  | -2.91800900 | -0.46264500 |
| C | 4.59278300  | -0.57756600 | 0.07902000  |
| C | 5.57450400  | -2.88957700 | -1.14101000 |
| H | 3.78361300  | -3.84362200 | -0.41436500 |
| C | 5.80770200  | -0.54564400 | -0.60522700 |
| H | 4.20721800  | 0.32343300  | 0.54757500  |
| C | 6.30435200  | -1.70224800 | -1.21477200 |
| H | 5.94937200  | -3.79209600 | -1.61644800 |
| H | 6.36941000  | 0.38310100  | -0.66180100 |
| H | 7.25218800  | -1.67549900 | -1.74572100 |

## TS7RR

|   |             |             |             |
|---|-------------|-------------|-------------|
| C | -3.09520300 | -1.99531800 | 0.62639800  |
| C | -2.29474100 | -2.78059900 | -0.22602900 |
| C | -4.56828200 | -1.68207600 | 0.37433800  |
| C | -2.72329600 | -3.37681300 | -1.55576800 |
| C | -3.60554300 | -0.03641200 | -1.32158100 |
| C | -3.01470500 | -0.93698200 | -2.23268600 |
| C | -4.75430600 | -0.34507500 | -0.37804500 |
| C | -3.49017500 | -2.37245100 | -2.44660900 |
| H | -5.03208600 | -2.50524600 | -0.17998100 |
| H | -5.09346300 | -1.63199500 | 1.33468600  |
| H | -3.32040100 | -4.28925800 | -1.40028900 |
| H | -1.81316500 | -3.69295200 | -2.07879300 |
| H | -4.80100700 | 0.46999400  | 0.35248200  |

|    |             |             |             |
|----|-------------|-------------|-------------|
| H  | -5.71517000 | -0.33342800 | -0.91684200 |
| H  | -3.35126200 | -2.64471400 | -3.49882600 |
| H  | -4.56722900 | -2.43588900 | -2.25742000 |
| H  | -2.44311000 | -0.49970500 | -3.05056300 |
| H  | -1.41329300 | -3.24236500 | 0.21818800  |
| H  | -3.45893800 | 1.02443900  | -1.52226200 |
| H  | -2.76366900 | -1.90022600 | 1.65955900  |
| Rh | -1.76552500 | -0.73194600 | -0.50554000 |
| C  | -1.65293100 | 2.32609000  | 1.11653700  |
| C  | -0.87652400 | 1.42482800  | 1.86606600  |
| C  | -1.40165000 | 0.90419200  | 3.05822800  |
| C  | -2.67675300 | 1.27225000  | 3.49436800  |
| C  | -3.43970200 | 2.17108500  | 2.74297900  |
| C  | -2.92759100 | 2.69669500  | 1.55359400  |
| C  | -0.99206100 | 2.86829800  | -0.12606300 |
| C  | -0.05579700 | 1.83390000  | -0.76214200 |
| H  | -0.80562500 | 0.21032800  | 3.64628600  |
| H  | -3.07242500 | 0.86310400  | 4.42049300  |
| H  | -4.43070000 | 2.46194300  | 3.08183900  |
| H  | -3.52148000 | 3.39400900  | 0.96692100  |
| H  | -1.73591400 | 3.14780500  | -0.88413000 |
| H  | -0.44685800 | 3.78337700  | 0.12564800  |
| O  | -0.60310500 | 0.82670300  | -1.34431900 |
| C  | 1.27048200  | 2.25594100  | -1.32162300 |
| C  | 1.87514300  | 3.49771900  | -1.05802100 |
| C  | 1.94254400  | 1.36137000  | -2.17672600 |
| C  | 3.10486100  | 3.83175300  | -1.62879200 |
| H  | 1.39433100  | 4.22050500  | -0.40826100 |
| C  | 3.16919400  | 1.69467300  | -2.74603700 |
| H  | 1.47606400  | 0.40655600  | -2.39088700 |
| C  | 3.75799600  | 2.93435700  | -2.47489700 |
| H  | 3.54940500  | 4.79939400  | -1.41196700 |
| H  | 3.66447900  | 0.98971200  | -3.40893700 |
| H  | 4.71284300  | 3.19800800  | -2.92152000 |
| C  | 0.50721600  | 1.14276700  | 1.37575500  |
| C  | 1.59851200  | 2.02855900  | 1.94848000  |
| H  | 1.27136500  | 3.07407100  | 1.97573600  |
| H  | 1.85363000  | 1.74731300  | 2.98173800  |
| H  | 2.51593500  | 1.97581900  | 1.35659300  |
| C  | 0.82670200  | -0.19650000 | 1.03166300  |
| O  | 0.01619800  | -1.09452200 | 0.65706100  |
| O  | 2.14834900  | -0.50019400 | 1.06424800  |
| C  | 2.54264700  | -1.79361600 | 0.55283300  |
| H  | 2.17663800  | -1.89123700 | -0.47469000 |

|   |            |             |             |
|---|------------|-------------|-------------|
| H | 2.07170800 | -2.57996500 | 1.15016100  |
| C | 4.04600800 | -1.88506800 | 0.62025100  |
| C | 4.66311800 | -2.87916400 | 1.38722200  |
| C | 4.84707100 | -0.98499600 | -0.09792600 |
| C | 6.05633700 | -2.98087200 | 1.43466500  |
| H | 4.05046700 | -3.57858800 | 1.95136500  |
| C | 6.23725100 | -1.07945700 | -0.04585900 |
| H | 4.37610700 | -0.20649700 | -0.69255300 |
| C | 6.84606100 | -2.07985100 | 0.71929200  |
| H | 6.52119400 | -3.75913200 | 2.03398000  |
| H | 6.84780700 | -0.37478700 | -0.60431000 |
| H | 7.92962700 | -2.15407500 | 0.75674600  |

### TS7RS

|    |             |             |             |
|----|-------------|-------------|-------------|
| C  | 4.35891700  | 0.64828300  | 0.08656000  |
| C  | 4.01214000  | -0.15273200 | 1.19393500  |
| C  | 5.31661800  | 0.22000700  | -1.02231900 |
| C  | 4.47332400  | -1.57857900 | 1.44280500  |
| C  | 3.31744000  | -1.17075400 | -1.79865800 |
| C  | 3.20465000  | -2.06281700 | -0.71315100 |
| C  | 4.57394600  | -0.42639200 | -2.21516300 |
| C  | 4.36856100  | -2.47258500 | 0.18598900  |
| H  | 6.06728100  | -0.46743100 | -0.61775400 |
| H  | 5.87032900  | 1.09675000  | -1.37577800 |
| H  | 5.49971900  | -1.59080400 | 1.84192400  |
| H  | 3.83588300  | -1.99574500 | 2.23112900  |
| H  | 4.26934600  | 0.36125100  | -2.91388400 |
| H  | 5.24996600  | -1.08933500 | -2.77767900 |
| H  | 4.23443800  | -3.51525400 | 0.49476500  |
| H  | 5.30349000  | -2.44468000 | -0.38384100 |
| H  | 2.35195000  | -2.73998700 | -0.72642700 |
| H  | 3.65579000  | 0.37342200  | 2.07947200  |
| H  | 2.55045200  | -1.24188900 | -2.56920800 |
| H  | 4.21490800  | 1.72155300  | 0.20064200  |
| Rh | 2.38252100  | -0.14773100 | -0.18190900 |
| C  | -1.56425400 | 3.25725300  | 0.11286900  |
| C  | -1.71920300 | 2.32201100  | -0.93388300 |
| C  | -2.89969200 | 2.33312900  | -1.68621600 |
| C  | -3.90706800 | 3.26384400  | -1.41594500 |
| C  | -3.73908200 | 4.19936600  | -0.39282400 |
| C  | -2.56905400 | 4.19250500  | 0.37313900  |
| C  | -0.28077500 | 3.17091900  | 0.92206400  |
| C  | 0.27588900  | 1.74273000  | 1.02923400  |

|   |             |             |             |
|---|-------------|-------------|-------------|
| H | -3.02936900 | 1.60610000  | -2.48296200 |
| H | -4.82087000 | 3.25864800  | -2.00469100 |
| H | -4.51994600 | 4.92542900  | -0.18200700 |
| H | -2.44872800 | 4.90591600  | 1.18563500  |
| H | -0.44103900 | 3.57547800  | 1.93121300  |
| H | 0.51189900  | 3.77308900  | 0.46216400  |
| O | 1.53067300  | 1.57203200  | 0.84212500  |
| C | -0.46790600 | 0.76767700  | 1.89973500  |
| C | 0.22936300  | -0.31968400 | 2.45815300  |
| C | -1.81796500 | 0.93875200  | 2.26137100  |
| C | -0.39827300 | -1.21538200 | 3.32224100  |
| H | 1.27972200  | -0.44824100 | 2.22214400  |
| C | -2.44650000 | 0.04311600  | 3.12644000  |
| H | -2.38785400 | 1.76932600  | 1.86455300  |
| C | -1.74312100 | -1.04044900 | 3.65915000  |
| H | 0.16694400  | -2.04289300 | 3.74328700  |
| H | -3.48982400 | 0.19743200  | 3.38815200  |
| H | -2.23327500 | -1.73180400 | 4.33957200  |
| C | -0.54486600 | 1.44356600  | -1.16973500 |
| C | 0.59163200  | 2.06575900  | -1.95461700 |
| H | 0.49414200  | 1.85468700  | -3.03034000 |
| H | 1.57466400  | 1.69480800  | -1.63864900 |
| H | 0.59543300  | 3.15450800  | -1.83900000 |
| C | -0.56449400 | 0.04563000  | -1.01852500 |
| O | 0.46429400  | -0.71112200 | -1.03819400 |
| O | -1.77992500 | -0.51511300 | -0.79301200 |
| C | -1.82415400 | -1.91661400 | -0.43307700 |
| H | -1.14716200 | -2.46962300 | -1.08916800 |
| H | -1.47664600 | -2.03184200 | 0.59765700  |
| C | -3.24827800 | -2.38579400 | -0.58870000 |
| C | -3.79763700 | -2.55973500 | -1.86717300 |
| C | -4.04443000 | -2.64933300 | 0.53140000  |
| C | -5.11601400 | -2.98716300 | -2.02208000 |
| H | -3.18643500 | -2.35594800 | -2.74331900 |
| C | -5.36413600 | -3.08376300 | 0.38029300  |
| H | -3.62818000 | -2.50906700 | 1.52580000  |
| C | -5.90259600 | -3.25230200 | -0.89650200 |
| H | -5.52943200 | -3.11823800 | -3.01860600 |
| H | -5.97046800 | -3.28743700 | 1.25897000  |
| H | -6.92880500 | -3.58947400 | -1.01605100 |

## TS7SR

|   |             |            |            |
|---|-------------|------------|------------|
| C | -4.35891700 | 0.64828300 | 0.08656000 |
|---|-------------|------------|------------|

|    |             |             |             |
|----|-------------|-------------|-------------|
| C  | -4.01214000 | -0.15273200 | 1.19393500  |
| C  | -5.31661800 | 0.22000700  | -1.02231900 |
| C  | -4.47332400 | -1.57857900 | 1.44280500  |
| C  | -3.31744000 | -1.17075400 | -1.79865800 |
| C  | -3.20465000 | -2.06281700 | -0.71315100 |
| C  | -4.57394600 | -0.42639200 | -2.21516300 |
| C  | -4.36856100 | -2.47258500 | 0.18598900  |
| H  | -6.06728100 | -0.46743100 | -0.61775400 |
| H  | -5.87032900 | 1.09675000  | -1.37577800 |
| H  | -5.49971900 | -1.59080400 | 1.84192400  |
| H  | -3.83588300 | -1.99574500 | 2.23112900  |
| H  | -4.26934600 | 0.36125100  | -2.91388400 |
| H  | -5.24996600 | -1.08933500 | -2.77767900 |
| H  | -4.23443800 | -3.51525400 | 0.49476500  |
| H  | -5.30349000 | -2.44468000 | -0.38384100 |
| H  | -2.35195000 | -2.73998700 | -0.72642700 |
| H  | -3.65579000 | 0.37342200  | 2.07947200  |
| H  | -2.55045200 | -1.24188900 | -2.56920800 |
| H  | -4.21490800 | 1.72155300  | 0.20064200  |
| Rh | -2.38252100 | -0.14773100 | -0.18190900 |
| C  | 1.56425400  | 3.25725300  | 0.11286900  |
| C  | 1.71920300  | 2.32201100  | -0.93388300 |
| C  | 2.89969200  | 2.33312900  | -1.68621600 |
| C  | 3.90706800  | 3.26384400  | -1.41594500 |
| C  | 3.73908200  | 4.19936600  | -0.39282400 |
| C  | 2.56905400  | 4.19250500  | 0.37313900  |
| C  | 0.28077500  | 3.17091900  | 0.92206400  |
| C  | -0.27588900 | 1.74273000  | 1.02923400  |
| H  | 3.02936900  | 1.60610000  | -2.48296200 |
| H  | 4.82087000  | 3.25864800  | -2.00469100 |
| H  | 4.51994600  | 4.92542900  | -0.18200700 |
| H  | 2.44872800  | 4.90591600  | 1.18563500  |
| H  | 0.44103900  | 3.57547800  | 1.93121300  |
| H  | -0.51189900 | 3.77308900  | 0.46216400  |
| O  | -1.53067300 | 1.57203200  | 0.84212500  |
| C  | 0.46790600  | 0.76767700  | 1.89973500  |
| C  | -0.22936300 | -0.31968400 | 2.45815300  |
| C  | 1.81796500  | 0.93875200  | 2.26137100  |
| C  | 0.39827300  | -1.21538200 | 3.32224100  |
| H  | -1.27972200 | -0.44824100 | 2.22214400  |
| C  | 2.44650000  | 0.04311600  | 3.12644000  |
| H  | 2.38785400  | 1.76932600  | 1.86455300  |
| C  | 1.74312100  | -1.04044900 | 3.65915000  |
| H  | -0.16694400 | -2.04289300 | 3.74328700  |

|   |             |             |             |
|---|-------------|-------------|-------------|
| H | 3.48982400  | 0.19743200  | 3.38815200  |
| H | 2.23327500  | -1.73180400 | 4.33957200  |
| C | 0.54486600  | 1.44356600  | -1.16973500 |
| C | -0.59163200 | 2.06575900  | -1.95461700 |
| H | -0.49414200 | 1.85468700  | -3.03034000 |
| H | -1.57466400 | 1.69480800  | -1.63864900 |
| H | -0.59543300 | 3.15450800  | -1.83900000 |
| C | 0.56449400  | 0.04563000  | -1.01852500 |
| O | -0.46429400 | -0.71112200 | -1.03819400 |
| O | 1.77992500  | -0.51511300 | -0.79301200 |
| C | 1.82415400  | -1.91661400 | -0.43307700 |
| H | 1.14716200  | -2.46962300 | -1.08916800 |
| H | 1.47664600  | -2.03184200 | 0.59765700  |
| C | 3.24827800  | -2.38579400 | -0.58870000 |
| C | 3.79763700  | -2.55973500 | -1.86717300 |
| C | 4.04443000  | -2.64933300 | 0.53140000  |
| C | 5.11601400  | -2.98716300 | -2.02208000 |
| H | 3.18643500  | -2.35594800 | -2.74331900 |
| C | 5.36413600  | -3.08376300 | 0.38029300  |
| H | 3.62818000  | -2.50906700 | 1.52580000  |
| C | 5.90259600  | -3.25230200 | -0.89650200 |
| H | 5.52943200  | -3.11823800 | -3.01860600 |
| H | 5.97046800  | -3.28743700 | 1.25897000  |
| H | 6.92880500  | -3.58947400 | -1.01605100 |

## TS7SS

|   |            |             |             |
|---|------------|-------------|-------------|
| C | 2.42606000 | -2.74812700 | -0.32047700 |
| C | 2.96765300 | -1.96274800 | 0.71658500  |
| C | 3.21731900 | -3.22871800 | -1.53437500 |
| C | 4.38884400 | -1.43314900 | 0.78657100  |
| C | 2.93744500 | -0.80723600 | -2.29646500 |
| C | 3.69808100 | -0.15330900 | -1.30444600 |
| C | 3.09243200 | -2.25496500 | -2.72912000 |
| C | 4.85563200 | -0.79402800 | -0.54140700 |
| H | 4.26872600 | -3.36644000 | -1.25985500 |
| H | 2.85146700 | -4.21697400 | -1.83466100 |
| H | 5.08519100 | -2.22661700 | 1.10121000  |
| H | 4.41251500 | -0.67302300 | 1.57500900  |
| H | 2.20223000 | -2.51853900 | -3.31215300 |
| H | 3.94990100 | -2.36741900 | -3.41134100 |
| H | 5.61100100 | -0.02961900 | -0.32750500 |
| H | 5.35111900 | -1.53741900 | -1.17529500 |
| H | 3.70056200 | 0.93518200  | -1.33040500 |

|    |             |             |             |
|----|-------------|-------------|-------------|
| H  | 2.44775600  | -1.99263600 | 1.67404500  |
| H  | 2.42282200  | -0.17020100 | -3.01617700 |
| H  | 1.52282200  | -3.31055100 | -0.08815200 |
| Rh | 1.77182100  | -0.70780900 | -0.52429400 |
| C  | 1.63736300  | 2.33369600  | 1.14802700  |
| C  | 0.87422100  | 1.40027300  | 1.87268100  |
| C  | 1.40933800  | 0.85318400  | 3.04788700  |
| C  | 2.68119200  | 1.22534800  | 3.49127600  |
| C  | 3.43084400  | 2.15457300  | 2.76374500  |
| C  | 2.90851200  | 2.70726700  | 1.59121800  |
| C  | 0.96460600  | 2.90240500  | -0.07581500 |
| C  | 0.05318500  | 1.86510200  | -0.74212200 |
| H  | 0.82399600  | 0.13602200  | 3.61829700  |
| H  | 3.08392200  | 0.79615200  | 4.40521600  |
| H  | 4.41917600  | 2.44808800  | 3.10806200  |
| H  | 3.49184700  | 3.42813300  | 1.02271200  |
| H  | 0.39739000  | 3.79487100  | 0.20707500  |
| H  | 1.70153700  | 3.22274000  | -0.82433400 |
| O  | 0.62575000  | 0.88144400  | -1.33752300 |
| C  | -1.27742900 | 2.27114500  | -1.30255600 |
| C  | -1.93484400 | 1.37053000  | -2.16271500 |
| C  | -1.89997900 | 3.50319100  | -1.03517900 |
| C  | -3.16564100 | 1.68789700  | -2.73200000 |
| H  | -1.45418800 | 0.42351900  | -2.38056300 |
| C  | -3.13374700 | 3.82151400  | -1.60642800 |
| H  | -1.42912500 | 4.23117500  | -0.38402900 |
| C  | -3.77288200 | 2.91778600  | -2.45639100 |
| H  | -3.64993600 | 0.97834200  | -3.39808000 |
| H  | -3.59235600 | 4.78205700  | -1.38733400 |
| H  | -4.73109500 | 3.16913200  | -2.90292400 |
| C  | -0.50864100 | 1.11952200  | 1.37849800  |
| C  | -1.60206400 | 1.99178400  | 1.96792100  |
| H  | -1.27616700 | 3.03702200  | 2.01552700  |
| H  | -2.51943800 | 1.94987400  | 1.37489200  |
| H  | -1.85729000 | 1.69043000  | 2.99543100  |
| C  | -0.82633600 | -0.21302200 | 1.00858200  |
| O  | -0.01634300 | -1.10276800 | 0.61078800  |
| O  | -2.14704200 | -0.52024600 | 1.04128600  |
| C  | -2.54106200 | -1.80740800 | 0.51406900  |
| H  | -2.05647200 | -2.60077200 | 1.09053300  |
| H  | -2.19091400 | -1.88455000 | -0.52076700 |
| C  | -4.04262200 | -1.90854400 | 0.60297500  |
| C  | -4.85915000 | -1.00268300 | -0.09003300 |
| C  | -4.64275600 | -2.91559100 | 1.36656000  |



|   |             |             |             |
|---|-------------|-------------|-------------|
| C | -6.24795400 | -1.10435000 | -0.01681700 |
| H | -4.40147500 | -0.21398800 | -0.68177600 |
| C | -6.03449800 | -3.02447800 | 1.43504300  |
| H | -4.01775400 | -3.61919200 | 1.91160200  |
| C | -6.83971700 | -2.11768800 | 0.74455900  |
| H | -6.87055200 | -0.39526600 | -0.55605200 |
| H | -6.48631700 | -3.81286000 | 2.03110400  |
| H | -7.92217400 | -2.19773300 | 0.79839300  |

## TS8aRR

|    |             |             |             |
|----|-------------|-------------|-------------|
| C  | 2.37342800  | 0.97618000  | 0.98342400  |
| C  | 2.96460900  | -0.22721000 | 0.57649100  |
| C  | 3.01804900  | 2.34948700  | 0.94800300  |
| C  | 4.40015400  | -0.36537600 | 0.07650700  |
| C  | 3.09448000  | 1.94733300  | -1.56119900 |
| C  | 3.44647600  | 0.66892800  | -2.05437300 |
| C  | 3.76831500  | 2.63017300  | -0.37391200 |
| C  | 4.49748500  | -0.25259700 | -1.46247400 |
| H  | 2.21741700  | 3.08870800  | 1.06635800  |
| H  | 3.68988800  | 2.48333600  | 1.81051700  |
| H  | 4.79123300  | -1.33963800 | 0.39063000  |
| H  | 5.03578100  | 0.38518400  | 0.55822200  |
| H  | 4.81280200  | 2.30761400  | -0.30187400 |
| H  | 3.79724200  | 3.71119400  | -0.55100800 |
| H  | 5.50696000  | 0.06847800  | -1.76439100 |
| H  | 4.34952000  | -1.24559900 | -1.90390000 |
| H  | 3.21411700  | 0.46866200  | -3.10190300 |
| H  | 2.49931800  | -1.14345300 | 0.92971800  |
| H  | 2.58646700  | 2.61437400  | -2.25713500 |
| H  | 1.49813300  | 0.89318100  | 1.62613900  |
| Rh | 1.62391600  | 0.50303900  | -0.98980000 |
| C  | 0.56647300  | -3.04599400 | 0.19439700  |
| C  | 0.05670200  | -2.49379700 | 1.37477100  |
| C  | 0.68377800  | -2.74264500 | 2.59713400  |
| C  | 1.83297100  | -3.53990800 | 2.62384500  |
| C  | 2.34407100  | -4.08951600 | 1.44261900  |
| C  | 1.71019400  | -3.84494700 | 0.22030100  |
| C  | -0.29707700 | -2.68038800 | -0.98517200 |
| C  | -1.17072300 | -1.49114400 | -0.47457500 |
| H  | 0.29790600  | -2.30938400 | 3.51412100  |
| H  | 2.33276700  | -3.73097100 | 3.56996400  |
| H  | 3.23725300  | -4.70797700 | 1.47521800  |
| H  | 2.10538200  | -4.27308700 | -0.69828900 |

|   |             |             |             |
|---|-------------|-------------|-------------|
| H | 0.27258500  | -2.36203100 | -1.86527700 |
| H | -0.89982000 | -3.54145700 | -1.29437800 |
| O | -0.47181400 | -0.27420300 | -0.66590200 |
| C | -2.53722200 | -1.39139700 | -1.17482200 |
| C | -3.28257500 | -2.52074900 | -1.55178000 |
| C | -3.07949800 | -0.12823300 | -1.46267200 |
| C | -4.51703800 | -2.39473900 | -2.19372400 |
| H | -2.91087900 | -3.52002600 | -1.34857200 |
| C | -4.31071600 | 0.00123400  | -2.10717100 |
| H | -2.52508800 | 0.75622100  | -1.17671900 |
| C | -5.03731200 | -1.13185000 | -2.47760400 |
| H | -5.06637800 | -3.28938400 | -2.47561700 |
| H | -4.70007500 | 0.99324000  | -2.32220300 |
| H | -5.99440300 | -1.03223700 | -2.98327700 |
| C | -1.24522500 | -1.74916600 | 1.10826100  |
| C | -2.42784700 | -2.65222100 | 1.54304300  |
| H | -2.37032500 | -3.62477700 | 1.04519500  |
| H | -2.37699200 | -2.83347800 | 2.62261900  |
| H | -3.39068000 | -2.19471600 | 1.31013700  |
| C | -1.34270800 | -0.41904300 | 1.86266200  |
| O | -0.48179300 | 0.05168200  | 2.58262200  |
| O | -2.55227400 | 0.14971400  | 1.69335700  |
| C | -2.82026400 | 1.37706700  | 2.42876700  |
| H | -2.34272800 | 1.30632000  | 3.40760900  |
| H | -3.90560200 | 1.36775700  | 2.54980600  |
| C | -2.36945800 | 2.61295300  | 1.68858100  |
| C | -1.17996300 | 3.26432600  | 2.03871200  |
| C | -3.14764000 | 3.13296800  | 0.64485600  |
| C | -0.77587100 | 4.41517000  | 1.35837800  |
| H | -0.57195200 | 2.86313300  | 2.84409200  |
| C | -2.74109200 | 4.27710200  | -0.04310200 |
| H | -4.07695100 | 2.63787500  | 0.37202800  |
| C | -1.55327600 | 4.92157000  | 0.31360200  |
| H | 0.14338400  | 4.91871700  | 1.64652600  |
| H | -3.35323900 | 4.67016500  | -0.85025600 |
| H | -1.23939800 | 5.81755300  | -0.21552700 |
| O | 0.31779200  | 0.64696000  | -2.67452400 |
| H | -0.34414700 | 0.08367600  | -1.83034600 |
| H | 0.57890700  | 0.00142300  | -3.35228700 |

**TS8aRS**

|   |            |             |             |
|---|------------|-------------|-------------|
| C | 3.21895800 | -0.97941600 | -1.55967200 |
| C | 3.32727000 | -1.55137900 | -0.28417300 |

|    |             |             |             |
|----|-------------|-------------|-------------|
| C  | 4.40523700  | -0.73063800 | -2.49051200 |
| C  | 4.61113500  | -1.97403100 | 0.40856000  |
| C  | 4.86544500  | 1.22278100  | -0.90795800 |
| C  | 5.16700400  | 0.50664000  | 0.27396500  |
| C  | 4.98841400  | 0.69097200  | -2.32551700 |
| C  | 5.73126600  | -0.91106700 | 0.30093300  |
| H  | 5.17847800  | -1.48507300 | -2.31818400 |
| H  | 4.07770600  | -0.86653300 | -3.52876100 |
| H  | 4.95743800  | -2.94301700 | 0.01793700  |
| H  | 4.37211600  | -2.13714200 | 1.46383100  |
| H  | 4.44313600  | 1.37952300  | -2.97943700 |
| H  | 6.03835500  | 0.72047500  | -2.65667400 |
| H  | 6.40533300  | -1.01579800 | 1.16058900  |
| H  | 6.34487100  | -1.08572700 | -0.58886600 |
| H  | 5.35295300  | 1.09982300  | 1.16978200  |
| H  | 2.41969900  | -1.99750400 | 0.12942400  |
| H  | 4.86760600  | 2.31118800  | -0.83894500 |
| H  | 2.24285100  | -1.02385900 | -2.04129600 |
| Rh | 3.04724000  | 0.56994800  | -0.03312100 |
| C  | -0.49209600 | -1.78405000 | -0.37291200 |
| C  | -0.58526600 | -1.79011500 | 1.02462800  |
| C  | -0.45980600 | -2.98296900 | 1.73564700  |
| C  | -0.23259000 | -4.17539400 | 1.03554400  |
| C  | -0.13865400 | -4.16649600 | -0.36150200 |
| C  | -0.26962000 | -2.96823800 | -1.07147700 |
| C  | -0.69619100 | -0.39307300 | -0.91088000 |
| C  | -0.45847700 | 0.53710600  | 0.31717700  |
| H  | -0.53358100 | -2.99826500 | 2.82210900  |
| H  | -0.12962400 | -5.11005000 | 1.57891700  |
| H  | 0.04083800  | -5.09720100 | -0.89679900 |
| H  | -0.19372800 | -2.96604000 | -2.15846800 |
| H  | -0.00583500 | -0.13080100 | -1.71841000 |
| H  | -1.71609400 | -0.28141100 | -1.29017200 |
| O  | 0.92727900  | 0.83303600  | 0.37257900  |
| C  | -1.19712200 | 1.88191600  | 0.20880800  |
| C  | -1.37280200 | 2.47151500  | -1.05411600 |
| C  | -1.61709100 | 2.60552000  | 1.33090300  |
| C  | -1.96750700 | 3.72718500  | -1.19341100 |
| H  | -1.04214600 | 1.94843100  | -1.94527300 |
| C  | -2.21571100 | 3.86208000  | 1.19902100  |
| H  | -1.49898200 | 2.19953300  | 2.32910900  |
| C  | -2.39751300 | 4.43097100  | -0.06314200 |
| H  | -2.09317200 | 4.15513300  | -2.18360700 |
| H  | -2.54071900 | 4.39845100  | 2.08794100  |

|   |             |             |             |
|---|-------------|-------------|-------------|
| H | -2.86187500 | 5.40691000  | -0.16707700 |
| C | -0.83421400 | -0.38823900 | 1.58211300  |
| C | 0.02195200  | -0.11421300 | 2.82794700  |
| H | 1.07657500  | -0.27496300 | 2.59580100  |
| H | -0.09612700 | 0.90894000  | 3.19450700  |
| H | -0.27103000 | -0.78794400 | 3.63880700  |
| C | -2.32084700 | -0.28427800 | 1.95683000  |
| O | -2.74540800 | -0.08805400 | 3.08014000  |
| O | -3.12603700 | -0.46497200 | 0.88908800  |
| C | -4.55296200 | -0.33648100 | 1.13558000  |
| H | -4.72962100 | 0.63219100  | 1.61093200  |
| H | -4.86101500 | -1.11910000 | 1.83752000  |
| C | -5.26647800 | -0.45788100 | -0.18203300 |
| C | -5.15572200 | 0.55493600  | -1.14525700 |
| C | -6.05005500 | -1.58155300 | -0.46741500 |
| C | -5.81520000 | 0.44478700  | -2.37067500 |
| H | -4.54721700 | 1.43078600  | -0.93357300 |
| C | -6.71714600 | -1.69430300 | -1.69174400 |
| H | -6.14084400 | -2.37634500 | 0.27222600  |
| C | -6.59956700 | -0.67991100 | -2.64583500 |
| H | -5.72133100 | 1.23611200  | -3.10884400 |
| H | -7.32502200 | -2.57083500 | -1.89893300 |
| H | -7.11592200 | -0.76464700 | -3.59816700 |
| O | 2.54719900  | 2.30479900  | 1.09988600  |
| H | 1.42207100  | 1.78897000  | 0.85116100  |
| H | 2.68954500  | 3.13356300  | 0.61125900  |

## TS8aSR

|   |             |             |             |
|---|-------------|-------------|-------------|
| C | -3.14662500 | 0.86092900  | 1.66776600  |
| C | -3.41985000 | 1.54381600  | 0.47085500  |
| C | -4.20777400 | 0.41968100  | 2.67431600  |
| C | -4.79400800 | 1.91556700  | -0.05495100 |
| C | -4.67347000 | -1.40042200 | 0.94668500  |
| C | -5.14793900 | -0.60115600 | -0.12007800 |
| C | -4.69567300 | -1.02266500 | 2.41662800  |
| C | -5.81537600 | 0.76177600  | 0.05279000  |
| H | -5.05006300 | 1.11982000  | 2.65794700  |
| H | -3.78425500 | 0.48046800  | 3.68377800  |
| H | -5.17056000 | 2.81682800  | 0.45329800  |
| H | -4.67754200 | 2.19072200  | -1.11153600 |
| H | -4.03630400 | -1.72308800 | 2.94642600  |
| H | -5.70175300 | -1.17111800 | 2.84007300  |
| H | -6.58360000 | 0.88498800  | -0.71628700 |

|    |             |             |             |
|----|-------------|-------------|-------------|
| H  | -6.34097200 | 0.79848300  | 1.01470700  |
| H  | -5.37158500 | -1.11674200 | -1.05202400 |
| H  | -2.59461400 | 2.10570100  | 0.02972500  |
| H  | -4.60549900 | -2.47479500 | 0.76261000  |
| H  | -2.13810400 | 0.94987200  | 2.06052300  |
| Rh | -3.01092200 | -0.51513900 | -0.02578400 |
| C  | 0.54782100  | 1.92084500  | 0.30774100  |
| C  | 0.79245300  | 2.03908500  | -1.06641500 |
| C  | 0.82743700  | 3.29505300  | -1.67486500 |
| C  | 0.60463500  | 4.43673300  | -0.89428300 |
| C  | 0.35607900  | 4.31616000  | 0.47818300  |
| C  | 0.32574200  | 3.05536800  | 1.08614700  |
| C  | 0.59809200  | 0.47829200  | 0.73103500  |
| C  | 0.41206700  | -0.32014100 | -0.59159400 |
| H  | 1.01653100  | 3.39287700  | -2.73890100 |
| H  | 0.62743100  | 5.41589900  | -1.35648700 |
| H  | 0.17948300  | 5.20877600  | 1.07494400  |
| H  | 0.13306100  | 2.96729700  | 2.15062700  |
| H  | -0.17832400 | 0.20220200  | 1.45083800  |
| H  | 1.57265100  | 0.25332600  | 1.17975100  |
| O  | -0.97718600 | -0.46368200 | -0.84755900 |
| C  | 1.02024800  | -1.73045200 | -0.53396500 |
| C  | 1.00690300  | -2.43813800 | 0.68122400  |
| C  | 1.50106100  | -2.39576700 | -1.67127800 |
| C  | 1.47313500  | -3.75138600 | 0.75958000  |
| H  | 0.63253200  | -1.95726700 | 1.57807000  |
| C  | 1.97212900  | -3.71235500 | -1.59573700 |
| H  | 1.52593900  | -1.89625700 | -2.63279200 |
| C  | 1.96274700  | -4.39430400 | -0.37889400 |
| H  | 1.45637300  | -4.26802400 | 1.71719800  |
| H  | 2.34605500  | -4.19778300 | -2.49084800 |
| H  | 2.32748900  | -5.41600000 | -0.31926200 |
| C  | 0.99757100  | 0.67100900  | -1.72090200 |
| C  | 0.26770700  | 0.57957900  | -3.06987500 |
| H  | -0.79217400 | 0.80082200  | -2.92867100 |
| H  | 0.34869400  | -0.41448100 | -3.51684300 |
| H  | 0.69500900  | 1.29166400  | -3.78114700 |
| C  | 2.50576400  | 0.47153700  | -1.94985100 |
| O  | 3.03180600  | 0.33052200  | -3.03854100 |
| O  | 3.20368200  | 0.49184100  | -0.79652800 |
| C  | 4.63225500  | 0.25535000  | -0.91245500 |
| H  | 4.77725900  | -0.67374600 | -1.46978600 |
| H  | 5.07671800  | 1.07380900  | -1.48701300 |
| C  | 5.20725700  | 0.17430500  | 0.47757800  |

|   |             |             |             |
|---|-------------|-------------|-------------|
| C | 4.93759700  | -0.93950200 | 1.28917500  |
| C | 6.01706800  | 1.19985000  | 0.97750500  |
| C | 5.46396100  | -1.01670800 | 2.57847300  |
| H | 4.30594300  | -1.74053000 | 0.90912000  |
| C | 6.55065500  | 1.11753300  | 2.26593200  |
| H | 6.22924700  | 2.06710000  | 0.35560600  |
| C | 6.27555000  | 0.01100000  | 3.06849000  |
| H | 5.24773000  | -1.88360300 | 3.19849600  |
| H | 7.18106500  | 1.92006800  | 2.64149300  |
| H | 6.69257600  | -0.05479200 | 4.06998100  |
| O | -2.52100900 | -2.12768700 | -1.33158300 |
| H | -1.45140500 | -1.46859400 | -1.24528300 |
| H | -2.43322400 | -2.95342800 | -0.82415000 |

### TS8aSS

|    |             |             |             |
|----|-------------|-------------|-------------|
| C  | -2.43798600 | 0.75587500  | 1.01935600  |
| C  | -2.99795400 | -0.39040000 | 0.43257700  |
| C  | -3.10200100 | 2.11742500  | 1.14278300  |
| C  | -4.41335300 | -0.47037900 | -0.13241900 |
| C  | -3.08416100 | 2.05953300  | -1.40317300 |
| C  | -3.40109100 | 0.85309400  | -2.07507000 |
| C  | -3.80705300 | 2.56850700  | -0.15855700 |
| C  | -4.46159800 | -0.14832600 | -1.64626800 |
| H  | -2.31575900 | 2.83946400  | 1.38919300  |
| H  | -3.80561400 | 2.12623500  | 1.98832000  |
| H  | -4.80229200 | -1.48464700 | 0.02879700  |
| H  | -5.07687400 | 0.19896100  | 0.42263500  |
| H  | -4.84875600 | 2.23234300  | -0.17151000 |
| H  | -3.83995000 | 3.66520900  | -0.18795600 |
| H  | -5.46419300 | 0.20757300  | -1.93849600 |
| H  | -4.29114000 | -1.07086200 | -2.21546100 |
| H  | -3.12619800 | 0.79442400  | -3.13010300 |
| H  | -2.53424500 | -1.34284400 | 0.67599200  |
| H  | -2.56194600 | 2.81792100  | -1.98645400 |
| H  | -1.57984300 | 0.59776500  | 1.67260400  |
| Rh | -1.61389100 | 0.56443500  | -0.97113000 |
| C  | -0.52263500 | -3.08836900 | 0.12907000  |
| C  | -0.00481700 | -2.57272100 | 1.31990700  |
| C  | -0.59401800 | -2.89719000 | 2.54522900  |
| C  | -1.71016700 | -3.73705600 | 2.56232900  |
| C  | -2.22946200 | -4.25508500 | 1.37060000  |
| C  | -1.63543400 | -3.93274900 | 0.14479900  |
| C  | 0.28566800  | -2.63240800 | -1.05650900 |

|   |             |             |             |
|---|-------------|-------------|-------------|
| C | 1.16223000  | -1.46145700 | -0.50947400 |
| H | -0.20049600 | -2.49252900 | 3.47036800  |
| H | -2.17965600 | -3.98750200 | 3.50842400  |
| H | -3.09788000 | -4.91037500 | 1.39607100  |
| H | -2.03878300 | -4.33547200 | -0.78115200 |
| H | -0.32773000 | -2.26482600 | -1.88464400 |
| H | 0.88342500  | -3.45881400 | -1.44928600 |
| O | 0.45893200  | -0.23552800 | -0.63429700 |
| C | 2.52105300  | -1.32722100 | -1.22370900 |
| C | 3.25028300  | -2.43459300 | -1.68367900 |
| C | 3.07416400  | -0.05147500 | -1.43095700 |
| C | 4.48064900  | -2.28058000 | -2.32679800 |
| H | 2.87389500  | -3.44095000 | -1.54071600 |
| C | 4.30137900  | 0.10608400  | -2.07987400 |
| H | 2.53519700  | 0.81702200  | -1.08266300 |
| C | 5.01092400  | -1.00469900 | -2.53500600 |
| H | 5.01693800  | -3.15770100 | -2.67495000 |
| H | 4.69741100  | 1.10889900  | -2.23129400 |
| H | 5.96510300  | -0.88316500 | -3.04090400 |
| C | 1.27095300  | -1.77858100 | 1.06175000  |
| C | 2.48713300  | -2.66175200 | 1.44208400  |
| H | 2.45169600  | -3.61120300 | 0.89924900  |
| H | 2.45483600  | -2.89103000 | 2.51261500  |
| H | 3.43045900  | -2.16303400 | 1.21745300  |
| C | 1.33605900  | -0.47667700 | 1.86461100  |
| O | 0.46184800  | -0.05000000 | 2.59572800  |
| O | 2.53099000  | 0.12524600  | 1.71949700  |
| C | 2.76863300  | 1.34130200  | 2.48607900  |
| H | 2.27181300  | 1.24271000  | 3.45113500  |
| H | 3.85156800  | 1.34893100  | 2.62572000  |
| C | 2.31144300  | 2.58258700  | 1.75544200  |
| C | 1.07085400  | 3.16758100  | 2.04465400  |
| C | 3.13201100  | 3.17293900  | 0.78604100  |
| C | 0.66139400  | 4.32085100  | 1.37258200  |
| H | 0.43263400  | 2.71410800  | 2.79366500  |
| C | 2.72082600  | 4.31734000  | 0.10335500  |
| H | 4.10187300  | 2.72882700  | 0.56167400  |
| C | 1.48191800  | 4.89724200  | 0.39810700  |
| H | -0.29968200 | 4.77369000  | 1.61001600  |
| H | 3.36503700  | 4.76630700  | -0.64626400 |
| H | 1.16105200  | 5.79426900  | -0.12561900 |
| O | -0.20384600 | 0.98343500  | -2.51523800 |
| H | 0.40629500  | 0.26638500  | -1.74007800 |
| H | -0.42156400 | 0.51725000  | -3.34022500 |

## TS8'bRR

|    |             |             |             |
|----|-------------|-------------|-------------|
| C  | -2.82473200 | 0.24093800  | -1.84409900 |
| C  | -3.14907800 | 1.27111500  | -0.94421500 |
| C  | -2.84997600 | 0.33796700  | -3.35816400 |
| C  | -3.64085400 | 2.65488400  | -1.35513400 |
| C  | -1.04600800 | 2.08414600  | -2.98549200 |
| C  | -1.18267700 | 3.01015500  | -1.92780900 |
| C  | -2.19059400 | 1.63072400  | -3.88738400 |
| C  | -2.47817800 | 3.66303500  | -1.48308600 |
| H  | -2.30444300 | -0.52767500 | -3.75108700 |
| H  | -3.88196000 | 0.24589600  | -3.73182600 |
| H  | -4.35086900 | 3.01646500  | -0.60319600 |
| H  | -4.20143400 | 2.58975300  | -2.29386500 |
| H  | -2.93101400 | 2.43185700  | -3.98299400 |
| H  | -1.80398600 | 1.45406900  | -4.89728000 |
| H  | -2.74692000 | 4.48630200  | -2.16373900 |
| H  | -2.29377100 | 4.12374300  | -0.50568100 |
| H  | -0.28857400 | 3.54971500  | -1.61872400 |
| H  | -3.39610000 | 0.97170100  | 0.06941900  |
| H  | -0.04862700 | 1.95813900  | -3.40519300 |
| H  | -2.84388400 | -0.77350100 | -1.44839700 |
| Rh | -0.98835700 | 1.05922900  | -1.09989900 |
| C  | -2.53585700 | 0.44384000  | 2.48905900  |
| C  | -2.92077000 | -0.85065700 | 2.12756300  |
| C  | -4.27397600 | -1.18936200 | 2.05645200  |
| C  | -5.23664400 | -0.21757400 | 2.34541500  |
| C  | -4.85044900 | 1.07694300  | 2.71300800  |
| C  | -3.49555300 | 1.41297600  | 2.78775700  |
| C  | -1.03655700 | 0.57453500  | 2.52620100  |
| C  | -0.49825900 | -0.70382300 | 1.80575000  |
| H  | -4.57841600 | -2.18974300 | 1.76589300  |
| H  | -6.29195100 | -0.47024200 | 2.28456500  |
| H  | -5.60693600 | 1.82381400  | 2.93985200  |
| H  | -3.19411300 | 2.41876400  | 3.07151400  |
| H  | -0.66587900 | 1.46276600  | 2.00424100  |
| H  | -0.69187800 | 0.65210000  | 3.56275100  |
| O  | -0.34111600 | -0.44848900 | 0.41901700  |
| C  | 0.83795200  | -1.21654100 | 2.37372400  |
| C  | 1.18348800  | -1.09692900 | 3.73103700  |
| C  | 1.75562200  | -1.85737300 | 1.52586300  |
| C  | 2.39612200  | -1.59006300 | 4.21896600  |
| H  | 0.50625000  | -0.62403900 | 4.43435600  |



|   |             |             |             |
|---|-------------|-------------|-------------|
| C | 2.96907300  | -2.34885000 | 2.00940300  |
| H | 1.51577300  | -1.96740700 | 0.47632400  |
| C | 3.29795000  | -2.21803700 | 3.35939400  |
| H | 2.63250900  | -1.47746900 | 5.27401200  |
| H | 3.66307400  | -2.82347200 | 1.32113100  |
| H | 4.24467600  | -2.59638400 | 3.73582300  |
| C | -1.70819200 | -1.75659700 | 1.96924400  |
| C | -1.59686600 | -2.64803500 | 3.23299000  |
| H | -1.55670600 | -2.02947900 | 4.13455700  |
| H | -2.48260500 | -3.28860600 | 3.31345100  |
| H | -0.70937500 | -3.28191100 | 3.20291300  |
| C | -1.80172000 | -2.66411600 | 0.73806800  |
| O | -2.69744600 | -2.64478500 | -0.08588900 |
| O | -0.79693300 | -3.56139000 | 0.70918500  |
| C | -0.82049000 | -4.55782900 | -0.35216000 |
| H | -1.86093600 | -4.80704400 | -0.56756500 |
| H | -0.32219100 | -5.42047600 | 0.09512200  |
| C | -0.09787400 | -4.10449800 | -1.59710700 |
| C | -0.80217600 | -3.53617300 | -2.66750600 |
| C | 1.29051000  | -4.26248600 | -1.70529500 |
| C | -0.13069800 | -3.13381500 | -3.82366700 |
| H | -1.87760000 | -3.41083000 | -2.58664500 |
| C | 1.96479800  | -3.85707000 | -2.85875900 |
| H | 1.84441900  | -4.71087500 | -0.88376500 |
| C | 1.25466200  | -3.29125200 | -3.92102900 |
| H | -0.68920600 | -2.70477700 | -4.65145000 |
| H | 3.04024100  | -3.99394200 | -2.93300400 |
| H | 1.77665400  | -2.98301500 | -4.82291800 |
| C | 2.23899700  | 5.06747100  | 0.19108700  |
| C | 2.28992500  | 3.75437200  | -0.26128600 |
| C | 2.17133300  | 2.66802300  | 0.60321700  |
| C | 2.00352400  | 2.81925800  | 1.97481300  |
| C | 1.93907300  | 4.14204900  | 2.44379300  |
| C | 2.05224500  | 5.23771500  | 1.57320400  |
| H | 2.33634300  | 5.92689800  | -0.46754300 |
| H | 1.93109700  | 1.97768400  | 2.65860600  |
| H | 1.80513100  | 4.32622100  | 3.50681600  |
| H | 1.99922800  | 6.24292700  | 1.98400000  |
| C | 2.30529200  | 1.63004200  | -0.52564800 |
| C | 2.46482800  | 2.89061800  | -1.49928800 |
| H | 1.68210100  | 2.95281000  | -2.25993900 |
| H | 3.44168300  | 2.95797900  | -1.99038900 |
| O | 1.15264600  | 0.86383800  | -0.79511800 |
| C | 3.54243900  | 0.73611900  | -0.51187500 |

|   |            |             |             |
|---|------------|-------------|-------------|
| C | 3.59887300 | -0.38327000 | -1.35559600 |
| C | 4.66421000 | 1.04285700  | 0.27003600  |
| C | 4.74874300 | -1.17162600 | -1.41702700 |
| H | 2.73111300 | -0.63748400 | -1.95494900 |
| C | 5.81479100 | 0.25244300  | 0.21100300  |
| H | 4.63869200 | 1.90102100  | 0.93518900  |
| C | 5.86328400 | -0.85747400 | -0.63440200 |
| H | 4.77324600 | -2.03409100 | -2.07858200 |
| H | 6.67187100 | 0.50472200  | 0.83030600  |
| H | 6.75827700 | -1.47239800 | -0.68176000 |
| H | 0.68850400 | 0.13819700  | 0.03143600  |

### TS8'bRS

|    |             |            |             |
|----|-------------|------------|-------------|
| C  | 1.32706000  | 3.37154600 | 1.15083800  |
| C  | 1.27354900  | 3.62992500 | -0.23192800 |
| C  | 2.40612500  | 3.91197000 | 2.08413800  |
| C  | 2.28940000  | 4.42588200 | -1.03087700 |
| C  | 3.81500100  | 2.08106300 | 1.00185800  |
| C  | 3.87345000  | 2.57110500 | -0.32070400 |
| C  | 3.57240000  | 2.91431100 | 2.24793400  |
| C  | 3.74956600  | 4.04545800 | -0.69719400 |
| H  | 2.77090000  | 4.87500600 | 1.71172100  |
| H  | 1.96361900  | 4.11631400 | 3.06540500  |
| H  | 2.12722300  | 5.50655600 | -0.89446800 |
| H  | 2.10224000  | 4.21777400 | -2.09015900 |
| H  | 3.33620600  | 2.21945200 | 3.06202100  |
| H  | 4.49376900  | 3.43729400 | 2.54893300  |
| H  | 4.38253600  | 4.24776900 | -1.56822000 |
| H  | 4.13878200  | 4.67304500 | 0.11163100  |
| H  | 4.37176600  | 1.94515100 | -1.05930600 |
| H  | 0.30144900  | 3.52245700 | -0.71198100 |
| H  | 4.26553600  | 1.11212400 | 1.21087100  |
| H  | 0.39213600  | 3.09074400 | 1.63120800  |
| Rh | 1.97554400  | 1.62807700 | 0.03122000  |
| C  | -2.22471400 | 2.28990200 | -0.05326600 |
| C  | -2.30355200 | 1.90639600 | -1.39606400 |
| C  | -2.71669600 | 2.81517000 | -2.37044900 |
| C  | -3.04383100 | 4.12104300 | -1.98813500 |
| C  | -2.95726200 | 4.50809700 | -0.64700900 |
| C  | -2.54806500 | 3.59171600 | 0.32826100  |
| C  | -1.79802500 | 1.13042800 | 0.80529300  |
| C  | -1.16364200 | 0.11528800 | -0.19168300 |
| H  | -2.78475000 | 2.52182100 | -3.41470300 |

|   |             |             |             |
|---|-------------|-------------|-------------|
| H | -3.36433200 | 4.83800100  | -2.73932400 |
| H | -3.20791500 | 5.52609600  | -0.36045800 |
| H | -2.47255300 | 3.89770900  | 1.36896600  |
| H | -1.07415900 | 1.39824500  | 1.58046000  |
| H | -2.67160800 | 0.69039300  | 1.29801000  |
| O | 0.20986800  | 0.42877400  | -0.33836500 |
| C | -1.25606800 | -1.33729300 | 0.29902600  |
| C | -1.21377300 | -1.60750300 | 1.67743600  |
| C | -1.29736300 | -2.43145000 | -0.57819400 |
| C | -1.23711700 | -2.91701800 | 2.16190200  |
| H | -1.16609600 | -0.78787400 | 2.38732500  |
| C | -1.32145500 | -3.74381800 | -0.09791500 |
| H | -1.32046300 | -2.27668100 | -1.64990000 |
| C | -1.29390900 | -3.99440400 | 1.27378000  |
| H | -1.21359100 | -3.09311600 | 3.23441500  |
| H | -1.35528000 | -4.56857000 | -0.80434300 |
| H | -1.31360800 | -5.01453500 | 1.64748100  |
| C | -1.90344300 | 0.44224700  | -1.58994400 |
| C | -1.00520800 | 0.26055800  | -2.82220900 |
| H | -0.11838000 | 0.88759000  | -2.72212300 |
| H | -0.67985000 | -0.77490000 | -2.94872800 |
| H | -1.54644500 | 0.54469100  | -3.72877900 |
| C | -3.19027400 | -0.37675500 | -1.77771600 |
| O | -3.47539900 | -1.00673500 | -2.77767900 |
| O | -4.00074700 | -0.30361600 | -0.70203200 |
| C | -5.22015300 | -1.09113700 | -0.76892700 |
| H | -4.94189800 | -2.12593200 | -0.99100400 |
| H | -5.83362700 | -0.72082000 | -1.59480900 |
| C | -5.92959600 | -0.96840800 | 0.55293500  |
| C | -5.40380600 | -1.58291600 | 1.69921900  |
| C | -7.12146100 | -0.24240000 | 0.65728900  |
| C | -6.05791800 | -1.46784200 | 2.92573700  |
| H | -4.47768500 | -2.14805800 | 1.62862700  |
| C | -7.78198900 | -0.13151000 | 1.88350200  |
| H | -7.53509100 | 0.23811000  | -0.22616100 |
| C | -7.25010200 | -0.74301300 | 3.02009300  |
| H | -5.64152200 | -1.94793600 | 3.80728100  |
| H | -8.70829800 | 0.43270900  | 1.94972100  |
| H | -7.76183800 | -0.65805800 | 3.97501200  |
| C | 5.65077500  | -1.86817100 | 1.85303600  |
| C | 4.75694800  | -1.67002700 | 0.80729500  |
| C | 3.38112800  | -1.82956100 | 0.96548800  |
| C | 2.80535800  | -2.17851700 | 2.18149700  |
| C | 3.69671700  | -2.36672400 | 3.25122100  |

|   |            |             |             |
|---|------------|-------------|-------------|
| C | 5.08396600 | -2.21859200 | 3.09006500  |
| H | 6.72664700 | -1.75620800 | 1.74429300  |
| H | 1.73473300 | -2.31109600 | 2.31242100  |
| H | 3.30752800 | -2.63972000 | 4.22905800  |
| H | 5.73282600 | -2.37951300 | 3.94754800  |
| C | 3.07736400 | -1.51158600 | -0.51116900 |
| C | 4.65673700 | -1.28328200 | -0.65756200 |
| H | 4.90796600 | -0.24331800 | -0.88824800 |
| H | 5.15689500 | -1.93997700 | -1.37762500 |
| O | 2.31559300 | -0.36170700 | -0.78110100 |
| C | 2.57481300 | -2.67585800 | -1.36557900 |
| C | 2.02715400 | -2.41594700 | -2.63121400 |
| C | 2.69695900 | -4.00919400 | -0.95161500 |
| C | 1.60901000 | -3.45998300 | -3.45783300 |
| H | 1.92740500 | -1.38675000 | -2.95894100 |
| C | 2.27890900 | -5.05538800 | -1.77839900 |
| H | 3.11091100 | -4.23450400 | 0.02663800  |
| C | 1.73238600 | -4.78604400 | -3.03454600 |
| H | 1.18667300 | -3.23671600 | -4.43446100 |
| H | 2.37745200 | -6.08222200 | -1.43520400 |
| H | 1.40531100 | -5.59967000 | -3.67661700 |
| H | 1.10234400 | -0.33665900 | -0.62122300 |

### TS8'bSR

|   |            |            |             |
|---|------------|------------|-------------|
| C | 1.25395400 | 3.22995100 | -0.29209400 |
| C | 1.53695400 | 2.67929400 | -1.55413400 |
| C | 2.12938900 | 4.25582900 | 0.42044300  |
| C | 2.76748400 | 2.96018700 | -2.39605000 |
| C | 3.60932000 | 2.22994300 | 0.88161800  |
| C | 4.00784800 | 1.92178700 | -0.43328600 |
| C | 3.14108900 | 3.58543900 | 1.37689000  |
| C | 4.07860300 | 2.92673700 | -1.57918700 |
| H | 2.64926300 | 4.87680400 | -0.31658500 |
| H | 1.48910900 | 4.93730600 | 0.99161000  |
| H | 2.66279900 | 3.92175800 | -2.92287900 |
| H | 2.81337600 | 2.19027200 | -3.17504200 |
| H | 2.66525200 | 3.43399800 | 2.35293400  |
| H | 4.00273400 | 4.24757700 | 1.55631200  |
| H | 4.90861400 | 2.65563300 | -2.24105600 |
| H | 4.31745800 | 3.92209700 | -1.18997000 |
| H | 4.61807700 | 1.02895400 | -0.55516600 |
| H | 0.69208800 | 2.27306600 | -2.10787600 |
| H | 3.95740800 | 1.55529000 | 1.66296900  |

|    |             |             |             |
|----|-------------|-------------|-------------|
| H  | 0.21649100  | 3.18875900  | 0.03442300  |
| Rh | 1.99938500  | 1.19798000  | -0.07258500 |
| C  | -1.92005500 | -0.18141200 | 2.75454700  |
| C  | -2.59179700 | -1.09917900 | 1.93609500  |
| C  | -3.69948400 | -1.79410600 | 2.42397600  |
| C  | -4.13836200 | -1.55088200 | 3.72896500  |
| C  | -3.47253800 | -0.62711700 | 4.54170000  |
| C  | -2.35683400 | 0.06222000  | 4.05705300  |
| C  | -0.73719200 | 0.40703300  | 2.03158500  |
| C  | -0.99653800 | 0.10869400  | 0.52402500  |
| H  | -4.23038300 | -2.50254400 | 1.79526100  |
| H  | -5.00658300 | -2.08080700 | 4.11165600  |
| H  | -3.82480400 | -0.44319800 | 5.55331600  |
| H  | -1.83736200 | 0.77927100  | 4.68854900  |
| H  | -0.58372300 | 1.47552400  | 2.21670100  |
| H  | 0.19091100  | -0.09970000 | 2.32692900  |
| O  | 0.19619800  | -0.07452400 | -0.20656500 |
| C  | -1.81060000 | 1.21772300  | -0.16438700 |
| C  | -1.77040500 | 1.32213800  | -1.56544300 |
| C  | -2.61651100 | 2.12313100  | 0.54106200  |
| C  | -2.50334500 | 2.30225700  | -2.23651700 |
| H  | -1.15911200 | 0.62347300  | -2.12481400 |
| C  | -3.34717800 | 3.10957000  | -0.12886200 |
| H  | -2.69164000 | 2.06427400  | 1.62133600  |
| C  | -3.29362600 | 3.20568300  | -1.52035400 |
| H  | -2.45204200 | 2.36266000  | -3.32071800 |
| H  | -3.95722900 | 3.80349500  | 0.44373500  |
| H  | -3.85884900 | 3.97445600  | -2.04051800 |
| C  | -1.87390100 | -1.26259400 | 0.60306000  |
| C  | -0.95523800 | -2.50180500 | 0.66725100  |
| H  | -1.55901200 | -3.40359100 | 0.81719100  |
| H  | -0.39050800 | -2.61569200 | -0.25955200 |
| H  | -0.26285600 | -2.42343300 | 1.51060100  |
| C  | -2.76529500 | -1.42454500 | -0.62914700 |
| O  | -2.38109300 | -1.89986300 | -1.68147300 |
| O  | -4.02307300 | -0.98195600 | -0.44116000 |
| C  | -4.89238900 | -1.03764900 | -1.60587500 |
| H  | -4.85001000 | -2.04378600 | -2.02991600 |
| H  | -4.49550000 | -0.33744900 | -2.34778300 |
| C  | -6.28558900 | -0.67120800 | -1.17031600 |
| C  | -7.28504900 | -1.64796800 | -1.09040900 |
| C  | -6.60045100 | 0.65385800  | -0.83603200 |
| C  | -8.57911600 | -1.31073400 | -0.68594900 |
| H  | -7.04937800 | -2.67775700 | -1.34867500 |

|   |             |             |             |
|---|-------------|-------------|-------------|
| C | -7.89004700 | 0.99203900  | -0.42634600 |
| H | -5.82888700 | 1.41760500  | -0.89366200 |
| C | -8.88305200 | 0.01018500  | -0.35192900 |
| H | -9.34638400 | -2.07834200 | -0.63168400 |
| H | -8.12304400 | 2.02180700  | -0.16873900 |
| H | -9.88880000 | 0.27532000  | -0.03696500 |
| C | 2.40511400  | -4.27420900 | -2.03707600 |
| C | 2.70318300  | -3.38943400 | -1.00779700 |
| C | 3.08843900  | -2.07306700 | -1.25138400 |
| C | 3.18532500  | -1.54940200 | -2.53550800 |
| C | 2.87715300  | -2.43038400 | -3.58477200 |
| C | 2.49950500  | -3.76031900 | -3.34064700 |
| H | 2.10520100  | -5.30471500 | -1.86524700 |
| H | 3.47709100  | -0.52188000 | -2.73572900 |
| H | 2.93230200  | -2.07870100 | -4.61192200 |
| H | 2.26942900  | -4.40450300 | -4.18557800 |
| C | 3.24203600  | -1.73674900 | 0.24097600  |
| C | 2.78468300  | -3.25408900 | 0.50252300  |
| H | 3.53069100  | -3.87808400 | 1.00701700  |
| H | 1.83575300  | -3.32505800 | 1.04193500  |
| O | 2.33700400  | -0.78045500 | 0.76300600  |
| H | 1.10963600  | -0.82436600 | 0.33849200  |
| C | 4.64540700  | -1.45255400 | 0.76034300  |
| C | 4.81550200  | -1.07796500 | 2.10339200  |
| C | 5.78487000  | -1.61210600 | -0.03853200 |
| C | 6.08969400  | -0.86465100 | 2.62943400  |
| H | 3.93831400  | -0.95315400 | 2.73077100  |
| C | 7.06282900  | -1.39627100 | 0.48709300  |
| H | 5.67523900  | -1.90561900 | -1.07831400 |
| C | 7.22059800  | -1.02159300 | 1.82184200  |
| H | 6.20082400  | -0.57661200 | 3.67181300  |
| H | 7.93375500  | -1.52117900 | -0.15125300 |
| H | 8.21338400  | -0.85416800 | 2.23089800  |

**TS8'bSS**

|   |             |             |             |
|---|-------------|-------------|-------------|
| C | -2.60532000 | -2.69713000 | -0.63796500 |
| C | -2.54636100 | -2.45485800 | 0.74847000  |
| C | -2.36370200 | -4.05863700 | -1.28312800 |
| C | -2.18613900 | -3.46851600 | 1.81822700  |
| C | 0.08069700  | -3.51280300 | -0.79886600 |
| C | 0.05047300  | -3.52333800 | 0.60906800  |
| C | -0.89105000 | -4.23557000 | -1.71458700 |
| C | -0.94673700 | -4.31493800 | 1.45052600  |

|    |             |             |             |
|----|-------------|-------------|-------------|
| H  | -2.66096000 | -4.85510100 | -0.59292800 |
| H  | -3.01264300 | -4.16122800 | -2.15995700 |
| H  | -3.04713500 | -4.11827600 | 2.04111800  |
| H  | -1.97647200 | -2.90937300 | 2.73675300  |
| H  | -0.76121400 | -3.82154400 | -2.72141600 |
| H  | -0.63223100 | -5.30370300 | -1.78728100 |
| H  | -0.45256200 | -4.64815200 | 2.36985600  |
| H  | -1.24235600 | -5.22615100 | 0.91975200  |
| H  | 0.96995100  | -3.24408100 | 1.12034600  |
| H  | -3.08471500 | -1.58069200 | 1.11333900  |
| H  | 1.02673200  | -3.25086400 | -1.27180900 |
| H  | -3.18352700 | -1.99277000 | -1.23111300 |
| Rh | -0.76868600 | -1.66780800 | -0.13256400 |
| C  | 4.46680800  | -0.91699600 | -0.01871000 |
| C  | 4.45040000  | 0.46067700  | 0.23096900  |
| C  | 5.63806500  | 1.15734800  | 0.44115600  |
| C  | 6.85150400  | 0.45970200  | 0.40084200  |
| C  | 6.86861600  | -0.91628500 | 0.15549400  |
| C  | 5.67315700  | -1.61330200 | -0.05811300 |
| C  | 3.06296000  | -1.42670800 | -0.22371600 |
| C  | 2.23473900  | -0.15479600 | -0.57303800 |
| H  | 5.63315800  | 2.22730600  | 0.63216000  |
| H  | 7.78523900  | 0.99304100  | 0.55810600  |
| H  | 7.81609600  | -1.44786700 | 0.12371600  |
| H  | 5.69024700  | -2.68231900 | -0.25719200 |
| H  | 2.98364300  | -2.20045800 | -0.99342800 |
| H  | 2.66946900  | -1.83538300 | 0.71203600  |
| O  | 0.91417900  | -0.28723800 | -0.09143800 |
| C  | 2.25943300  | 0.13915500  | -2.08632000 |
| C  | 1.25329200  | 0.92685200  | -2.66820500 |
| C  | 3.27308500  | -0.34249000 | -2.93130600 |
| C  | 1.25206100  | 1.21773100  | -4.03299300 |
| H  | 0.45742500  | 1.32830700  | -2.05364200 |
| C  | 3.27436100  | -0.05621800 | -4.29903400 |
| H  | 4.08068400  | -0.94518300 | -2.53163300 |
| C  | 2.26354400  | 0.72479900  | -4.85917600 |
| H  | 0.45727400  | 1.83227100  | -4.44779900 |
| H  | 4.07162800  | -0.44924000 | -4.92466800 |
| H  | 2.26431700  | 0.94763900  | -5.92275500 |
| C  | 3.02112200  | 0.99374300  | 0.25354400  |
| C  | 2.89498100  | 2.41570000  | -0.30685700 |
| H  | 3.35718300  | 2.47314000  | -1.29525200 |
| H  | 1.85311400  | 2.73161700  | -0.39162200 |
| H  | 3.40077000  | 3.13168600  | 0.34909600  |

|   |             |             |             |
|---|-------------|-------------|-------------|
| C | 2.52935900  | 0.90539500  | 1.71932700  |
| O | 2.84921700  | 0.02245500  | 2.49150200  |
| O | 1.74168300  | 1.94235900  | 2.07416200  |
| C | 1.36603900  | 2.03920200  | 3.48238800  |
| H | 1.24359300  | 3.11318400  | 3.63620900  |
| H | 2.20437500  | 1.67735500  | 4.08030100  |
| C | 0.09277000  | 1.30516500  | 3.82811400  |
| C | -1.14183000 | 1.96492800  | 3.75634300  |
| C | 0.12690200  | -0.02670000 | 4.26650300  |
| C | -2.32265200 | 1.30787500  | 4.10817900  |
| H | -1.17798800 | 3.00026200  | 3.42625000  |
| C | -1.05165000 | -0.68293600 | 4.62570500  |
| H | 1.08111200  | -0.54060100 | 4.31891300  |
| C | -2.27905700 | -0.01792100 | 4.54628200  |
| H | -3.27180500 | 1.83432600  | 4.05351900  |
| H | -1.01095000 | -1.71015900 | 4.97851300  |
| H | -3.19499600 | -0.52762100 | 4.83345400  |
| H | -0.03767800 | 0.44479700  | -0.25398600 |
| C | -5.08340800 | 0.09303000  | -2.53594700 |
| C | -3.83782300 | 0.48234700  | -2.05591400 |
| C | -3.64234700 | 0.84450300  | -0.72508900 |
| C | -4.66320700 | 0.83050500  | 0.21653100  |
| C | -5.92242100 | 0.42198000  | -0.25257200 |
| C | -6.12728000 | 0.06641000  | -1.59577100 |
| H | -5.26114000 | -0.18252800 | -3.57245400 |
| H | -4.51561200 | 1.11854200  | 1.25412200  |
| H | -6.76373700 | 0.38613600  | 0.43499900  |
| H | -7.12218800 | -0.23596100 | -1.91302100 |
| C | -2.15967700 | 1.20094700  | -0.93161800 |
| C | -2.38660700 | 0.71166600  | -2.44500900 |
| H | -1.81438300 | -0.19765000 | -2.65747300 |
| H | -2.19084100 | 1.44965800  | -3.23013700 |
| O | -1.26621700 | 0.43481800  | -0.16721300 |
| C | -1.87721400 | 2.69962800  | -0.78608000 |
| C | -0.96397400 | 3.17070500  | 0.16438500  |
| C | -2.56136600 | 3.63979500  | -1.57498000 |
| C | -0.72372500 | 4.54147700  | 0.30916600  |
| H | -0.43856800 | 2.46537800  | 0.79571000  |
| C | -2.32406600 | 5.00606500  | -1.43017200 |
| H | -3.29602700 | 3.30512300  | -2.30216400 |
| C | -1.39954100 | 5.46529100  | -0.48709800 |
| H | -0.00253000 | 4.88096600  | 1.04846300  |
| H | -2.86387800 | 5.71349800  | -2.05447000 |
| H | -1.21316300 | 6.53002900  | -0.37499000 |



## TS8'cRR

|    |             |             |             |
|----|-------------|-------------|-------------|
| C  | 1.90950700  | -0.60754600 | 2.80348400  |
| C  | 1.88828900  | 0.77726000  | 2.56102200  |
| C  | 1.26639100  | -1.32009500 | 3.97743800  |
| C  | 1.24737400  | 1.81585000  | 3.47650300  |
| C  | -0.88783100 | -0.40954100 | 2.99272800  |
| C  | -0.91402800 | 0.90269600  | 2.47941200  |
| C  | -0.16491600 | -0.82317200 | 4.27068000  |
| C  | -0.21442000 | 2.11037700  | 3.07303800  |
| H  | 1.23018200  | -2.38835100 | 3.73343300  |
| H  | 1.90421000  | -1.23222600 | 4.87118600  |
| H  | 1.82913600  | 2.74319500  | 3.42895800  |
| H  | 1.30131300  | 1.47841500  | 4.51683100  |
| H  | -0.14818400 | 0.01079900  | 4.98044400  |
| H  | -0.73067300 | -1.62333500 | 4.76098500  |
| H  | -0.78457000 | 2.49647000  | 3.93272000  |
| H  | -0.22771200 | 2.90407800  | 2.31778600  |
| H  | -1.73311300 | 1.13962200  | 1.80083000  |
| H  | 2.65764700  | 1.15324500  | 1.89230200  |
| H  | -1.70763900 | -1.05266100 | 2.68919000  |
| H  | 2.69031400  | -1.17660400 | 2.30278200  |
| Rh | 0.44288000  | -0.21725900 | 1.28626400  |
| C  | -3.55270500 | -2.03369300 | 0.93059300  |
| C  | -4.09673600 | -1.29285800 | -0.12326200 |
| C  | -5.34231700 | -0.68124000 | 0.01216000  |
| C  | -6.03403700 | -0.80579400 | 1.22229400  |
| C  | -5.48974300 | -1.54548500 | 2.27700700  |
| C  | -4.24518400 | -2.16926700 | 2.13325500  |
| C  | -2.23722400 | -2.63775100 | 0.51532100  |
| C  | -1.78184800 | -1.77915600 | -0.69616300 |
| H  | -5.77388600 | -0.10699700 | -0.80364600 |
| H  | -7.00142100 | -0.32500000 | 1.34119900  |
| H  | -6.03588400 | -1.63781900 | 3.21205200  |
| H  | -3.82763700 | -2.75288200 | 2.95067000  |
| H  | -1.47162000 | -2.63489300 | 1.29618600  |
| H  | -2.38749800 | -3.68144700 | 0.21261000  |
| O  | -1.18742200 | -0.58308100 | -0.18498800 |
| C  | -0.80366600 | -2.51330700 | -1.62689200 |
| C  | -0.10932800 | -3.65231500 | -1.18984500 |
| C  | -0.52671400 | -2.03740500 | -2.91997700 |
| C  | 0.81877800  | -4.29925100 | -2.01116600 |
| H  | -0.28156500 | -4.05070200 | -0.19566600 |

|   |             |             |             |
|---|-------------|-------------|-------------|
| C | 0.39552600  | -2.68374700 | -3.74440600 |
| H | -1.03080900 | -1.15530800 | -3.29394000 |
| C | 1.07386800  | -3.81928500 | -3.29585700 |
| H | 1.33526100  | -5.18251300 | -1.64391300 |
| H | 0.57989600  | -2.29726600 | -4.74347900 |
| H | 1.78940200  | -4.32357800 | -3.93987300 |
| C | -3.20801700 | -1.38805000 | -1.36058000 |
| C | -3.74216800 | -2.52226700 | -2.26625600 |
| H | -3.74655200 | -3.47457500 | -1.72768200 |
| H | -4.77100100 | -2.30203600 | -2.56865100 |
| H | -3.13801500 | -2.63129500 | -3.16762900 |
| C | -3.18099500 | -0.09633900 | -2.18711200 |
| O | -3.18387100 | -0.06182800 | -3.40428200 |
| O | -3.17173100 | 1.01467800  | -1.42931000 |
| C | -3.03887200 | 2.26806900  | -2.14461200 |
| H | -3.99956200 | 2.48871800  | -2.62440600 |
| H | -2.28717500 | 2.14859500  | -2.92687500 |
| C | -2.64582800 | 3.33442100  | -1.15488900 |
| C | -3.39019800 | 3.54065300  | 0.01615600  |
| C | -1.53380600 | 4.14779900  | -1.40439100 |
| C | -3.02477200 | 4.53885900  | 0.91934900  |
| H | -4.25050200 | 2.90926700  | 0.22100600  |
| C | -1.17003300 | 5.15355200  | -0.50344400 |
| H | -0.95217900 | 3.99909900  | -2.31133700 |
| C | -1.91387300 | 5.34962800  | 0.66108300  |
| H | -3.60870400 | 4.68833800  | 1.82358300  |
| H | -0.30595400 | 5.77826000  | -0.71259000 |
| H | -1.63366800 | 6.13007800  | 1.36333900  |
| C | 4.11588300  | 2.44159100  | -3.15092400 |
| C | 3.69653100  | 1.37495400  | -2.36643700 |
| C | 3.42977800  | 1.50992000  | -1.00443800 |
| C | 3.54063000  | 2.73334600  | -0.35034500 |
| C | 3.95314100  | 3.82343000  | -1.13417100 |
| C | 4.23858200  | 3.67981900  | -2.50032100 |
| H | 4.33147400  | 2.34594500  | -4.21200200 |
| H | 3.32691100  | 2.86954800  | 0.70621200  |
| H | 4.05753200  | 4.80244000  | -0.67322000 |
| H | 4.55666300  | 4.55185200  | -3.06634900 |
| C | 3.07220100  | 0.01683600  | -0.83353500 |
| C | 3.34457100  | -0.09875600 | -2.41214100 |
| H | 2.43900600  | -0.34936900 | -2.97293000 |
| H | 4.14782300  | -0.78816100 | -2.69413700 |
| O | 1.72747100  | -0.27869000 | -0.50048800 |
| C | 4.01589600  | -0.84638800 | -0.01287900 |

|   |             |             |             |
|---|-------------|-------------|-------------|
| C | 3.77314900  | -2.22891500 | 0.05742500  |
| C | 5.14012000  | -0.32796600 | 0.63923900  |
| C | 4.63065100  | -3.06635400 | 0.76975500  |
| H | 2.90335600  | -2.63905100 | -0.44739200 |
| C | 5.99920300  | -1.16700900 | 1.35719500  |
| H | 5.34834500  | 0.73655800  | 0.58816000  |
| C | 5.74756100  | -2.53732600 | 1.42624800  |
| H | 4.42956800  | -4.13391500 | 0.81198200  |
| H | 6.86455200  | -0.74500100 | 1.86178900  |
| H | 6.41527500  | -3.18977400 | 1.98263700  |
| O | -0.02074900 | 0.83183100  | -1.75944400 |
| H | 1.00882900  | 0.28242700  | -1.17967500 |
| H | -0.75909300 | 0.10259900  | -1.00317400 |
| H | -0.08153200 | 1.73589500  | -1.40816900 |

### TS8'cRS

|    |             |             |             |
|----|-------------|-------------|-------------|
| C  | 0.75212700  | -2.99017400 | -1.39035400 |
| C  | 0.72993600  | -3.38561500 | -0.04263700 |
| C  | 1.69933800  | -3.55574800 | -2.44449200 |
| C  | 1.66644600  | -4.38188000 | 0.61375100  |
| C  | 3.39958500  | -2.05667200 | -1.28253300 |
| C  | 3.44443900  | -2.68631800 | -0.02094000 |
| C  | 2.98112400  | -2.70697000 | -2.58702600 |
| C  | 3.14289400  | -4.16125500 | 0.22296300  |
| H  | 1.94875300  | -4.59339800 | -2.19863300 |
| H  | 1.17940700  | -3.59095000 | -3.40832000 |
| H  | 1.35110000  | -5.41207600 | 0.38510300  |
| H  | 1.56194400  | -4.26494200 | 1.69859600  |
| H  | 2.79969300  | -1.90423600 | -3.31153300 |
| H  | 3.80413400  | -3.31115100 | -3.00013700 |
| H  | 3.79020000  | -4.53121200 | 1.02569600  |
| H  | 3.39994700  | -4.74541700 | -0.66698100 |
| H  | 4.05662600  | -2.20090300 | 0.73594800  |
| H  | -0.19825200 | -3.21500000 | 0.49777400  |
| H  | 4.01941200  | -1.16963200 | -1.40099500 |
| H  | -0.15791400 | -2.54307400 | -1.77718600 |
| Rh | 1.68364700  | -1.46179900 | -0.15786200 |
| C  | -2.54972000 | -2.05618400 | -0.51168800 |
| C  | -2.69515800 | -2.17235600 | 0.87393400  |
| C  | -3.17935500 | -3.35128000 | 1.44244600  |
| C  | -3.51552200 | -4.42111000 | 0.60579500  |
| C  | -3.37777700 | -4.30398600 | -0.78136900 |
| C  | -2.89641400 | -3.11837500 | -1.34673800 |

|   |             |             |             |
|---|-------------|-------------|-------------|
| C | -2.03690200 | -0.69040300 | -0.88178000 |
| C | -1.49598000 | -0.07977600 | 0.44630900  |
| H | -3.29844600 | -3.44319300 | 2.51877500  |
| H | -3.89007800 | -5.34570500 | 1.03682500  |
| H | -3.64606200 | -5.13847200 | -1.42391100 |
| H | -2.79222700 | -3.03064400 | -2.42581100 |
| H | -1.24935800 | -0.70449100 | -1.64201100 |
| H | -2.85995300 | -0.08129200 | -1.26989100 |
| O | -0.10443300 | -0.35626900 | 0.58601600  |
| C | -1.64654800 | 1.45502600  | 0.47708700  |
| C | -1.51687300 | 2.18794200  | -0.71405300 |
| C | -1.81655200 | 2.17828800  | 1.66900000  |
| C | -1.58283400 | 3.58232500  | -0.72160500 |
| H | -1.36290700 | 1.66770500  | -1.65405100 |
| C | -1.88549600 | 3.57475800  | 1.66616100  |
| H | -1.90945800 | 1.66173900  | 2.61691000  |
| C | -1.77186900 | 4.28475600  | 0.47059400  |
| H | -1.48117000 | 4.11877500  | -1.66120000 |
| H | -2.02812600 | 4.10320900  | 2.60508800  |
| H | -1.82582200 | 5.36993000  | 0.46746000  |
| C | -2.30939600 | -0.87964900 | 1.59226200  |
| C | -1.48904600 | -1.14697600 | 2.86323500  |
| H | -0.63270700 | -1.77946400 | 2.62514500  |
| H | -1.10911200 | -0.22572000 | 3.31074000  |
| H | -2.10788200 | -1.64960900 | 3.61117600  |
| C | -3.62289500 | -0.17717700 | 1.97928700  |
| O | -3.97916600 | 0.05784200  | 3.11774000  |
| O | -4.37153400 | 0.12924400  | 0.90024100  |
| C | -5.61036800 | 0.84022400  | 1.16678200  |
| H | -5.36813300 | 1.73235200  | 1.75239900  |
| H | -6.25870500 | 0.20232800  | 1.77378400  |
| C | -6.24505200 | 1.18830000  | -0.15293900 |
| C | -5.67057700 | 2.16601300  | -0.97889500 |
| C | -7.41544900 | 0.54625500  | -0.57262500 |
| C | -6.25665200 | 2.49033600  | -2.20224600 |
| H | -4.76035200 | 2.66899100  | -0.66196100 |
| C | -8.00808100 | 0.87452700  | -1.79464600 |
| H | -7.86610400 | -0.21392200 | 0.06098600  |
| C | -7.42864800 | 1.84649600  | -2.61194400 |
| H | -5.80323000 | 3.24924800  | -2.83427300 |
| H | -8.91870800 | 0.37041700  | -2.10671000 |
| H | -7.88755000 | 2.10373800  | -3.56281800 |
| C | 2.30516000  | 4.06827400  | -1.83446000 |
| C | 2.74636600  | 2.85563600  | -1.31944900 |

|   |            |             |             |
|---|------------|-------------|-------------|
| C | 3.06625900 | 2.69865300  | 0.02631800  |
| C | 2.95541300 | 3.73022100  | 0.95081100  |
| C | 2.49177300 | 4.95608900  | 0.44574200  |
| C | 2.18008900 | 5.12138900  | -0.91314900 |
| H | 2.06417100 | 4.21509700  | -2.88427000 |
| H | 3.21410600 | 3.61808000  | 2.00046100  |
| H | 2.37950300 | 5.80245700  | 1.11850800  |
| H | 1.83432900 | 6.09265800  | -1.25801400 |
| C | 3.53621300 | 1.23818100  | -0.15349500 |
| C | 3.08944200 | 1.41977100  | -1.67802100 |
| H | 2.22914400 | 0.78494000  | -1.91678400 |
| H | 3.86786600 | 1.26424700  | -2.43253100 |
| O | 2.80078500 | 0.27696500  | 0.57448000  |
| C | 5.03977700 | 1.06217600  | 0.07846800  |
| C | 5.98698400 | 1.70633800  | -0.73410900 |
| C | 5.50185900 | 0.29686800  | 1.15726200  |
| C | 7.35342300 | 1.56689100  | -0.49063300 |
| H | 5.65978600 | 2.33356200  | -1.55866600 |
| C | 6.87053600 | 0.15865600  | 1.40484200  |
| H | 4.77719400 | -0.18724800 | 1.80220300  |
| C | 7.80292500 | 0.78821200  | 0.57943200  |
| H | 8.06789200 | 2.07023800  | -1.13699900 |
| H | 7.20530500 | -0.44185500 | 2.24703500  |
| H | 8.86742500 | 0.67961100  | 0.76921700  |
| O | 1.13616400 | 1.01656800  | 2.13061000  |
| H | 0.40305400 | 0.35562100  | 1.41048300  |
| H | 0.89962800 | 1.94317600  | 1.95826500  |
| H | 2.09932200 | 0.73748100  | 1.37229200  |

### TS8'cSR

|   |             |             |             |
|---|-------------|-------------|-------------|
| C | -1.38729700 | -3.21117400 | 0.36256100  |
| C | -1.58952600 | -2.78034300 | -0.95763700 |
| C | -2.26352800 | -4.22340400 | 1.09394100  |
| C | -2.72103700 | -3.19980600 | -1.87609400 |
| C | -3.87286200 | -2.25417200 | 1.23971100  |
| C | -4.16980600 | -2.07807000 | -0.13029500 |
| C | -3.39611300 | -3.53794600 | 1.89065200  |
| C | -4.09514900 | -3.18416900 | -1.17636200 |
| H | -2.67643100 | -4.94230800 | 0.37833400  |
| H | -1.63940400 | -4.80479300 | 1.78155400  |
| H | -2.51022700 | -4.19066000 | -2.30885100 |
| H | -2.74164900 | -2.49712300 | -2.71702200 |
| H | -3.02951300 | -3.28525500 | 2.89216600  |

|    |             |             |             |
|----|-------------|-------------|-------------|
| H  | -4.24066700 | -4.22930300 | 2.03825200  |
| H  | -4.87979700 | -3.02385900 | -1.92395800 |
| H  | -4.30700600 | -4.15513000 | -0.71584300 |
| H  | -4.80893900 | -1.23799600 | -0.38433800 |
| H  | -0.72400300 | -2.36848600 | -1.47027000 |
| H  | -4.30988100 | -1.52919200 | 1.92612300  |
| H  | -0.38186300 | -3.09388200 | 0.75377700  |
| Rh | -2.25907500 | -1.20852400 | 0.35754800  |
| C  | 2.57736600  | -1.03047500 | 2.75203900  |
| C  | 3.10113500  | 0.12032800  | 2.15022200  |
| C  | 4.39067100  | 0.55108500  | 2.46668900  |
| C  | 5.15575200  | -0.18952500 | 3.37276700  |
| C  | 4.63485400  | -1.34512900 | 3.96457500  |
| C  | 3.33911300  | -1.77045700 | 3.65686900  |
| C  | 1.16595500  | -1.27599500 | 2.29051800  |
| C  | 1.00647400  | -0.42928800 | 0.99038400  |
| H  | 4.80862100  | 1.43871400  | 2.00199700  |
| H  | 6.16490300  | 0.13382600  | 3.61406300  |
| H  | 5.23990200  | -1.91512600 | 4.66482200  |
| H  | 2.93151200  | -2.66735000 | 4.11763700  |
| H  | 0.93797100  | -2.33454000 | 2.13299300  |
| H  | 0.44072400  | -0.90409000 | 3.02529700  |
| O  | -0.32678200 | -0.00661000 | 0.79155100  |
| C  | 1.48661900  | -1.16665700 | -0.27167600 |
| C  | 1.09177800  | -0.68940800 | -1.53403500 |
| C  | 2.34045500  | -2.27788500 | -0.22895100 |
| C  | 1.53370500  | -1.30034200 | -2.70877300 |
| H  | 0.42650500  | 0.16397900  | -1.58862700 |
| C  | 2.77478100  | -2.90011800 | -1.40365300 |
| H  | 2.68463100  | -2.66816700 | 0.72221100  |
| C  | 2.37505500  | -2.41510100 | -2.64979700 |
| H  | 1.21059200  | -0.91073700 | -3.67090900 |
| H  | 3.42757200  | -3.76676300 | -1.33860000 |
| H  | 2.71217000  | -2.89897600 | -3.56261000 |
| C  | 2.04637500  | 0.80668000  | 1.29173700  |
| C  | 1.39709700  | 1.93141200  | 2.12907900  |
| H  | 2.15943000  | 2.67361000  | 2.39147400  |
| H  | 0.61017000  | 2.43456100  | 1.56724100  |
| H  | 0.98454600  | 1.53281500  | 3.05876000  |
| C  | 2.54460100  | 1.44954800  | -0.00324600 |
| O  | 1.91610900  | 2.28506600  | -0.62995800 |
| O  | 3.75478500  | 1.01018700  | -0.39294200 |
| C  | 4.25189900  | 1.55032600  | -1.64862200 |
| H  | 4.21971200  | 2.64165700  | -1.60073300 |

|   |             |             |             |
|---|-------------|-------------|-------------|
| H | 3.57212600  | 1.22447300  | -2.44215100 |
| C | 5.65253400  | 1.04071000  | -1.85906500 |
| C | 6.74468900  | 1.91299600  | -1.78677200 |
| C | 5.88126600  | -0.31538800 | -2.13452700 |
| C | 8.04517100  | 1.44358400  | -1.98929600 |
| H | 6.57638600  | 2.96599700  | -1.57321100 |
| C | 7.17886400  | -0.78732700 | -2.33030300 |
| H | 5.03860100  | -0.99988700 | -2.18950000 |
| C | 8.26417800  | 0.09192300  | -2.26016200 |
| H | 8.88369500  | 2.13248900  | -1.93366100 |
| H | 7.34482900  | -1.84030500 | -2.54194400 |
| H | 9.27450400  | -0.27610200 | -2.41761600 |
| C | -3.16693100 | 5.13489700  | 1.18069800  |
| C | -3.48986200 | 3.81120700  | 0.90911800  |
| C | -2.60167900 | 2.94190800  | 0.27799600  |
| C | -1.31822400 | 3.33126000  | -0.09249000 |
| C | -0.97654200 | 4.66493900  | 0.18662700  |
| C | -1.87927300 | 5.54674500  | 0.80101500  |
| H | -3.85352400 | 5.82471800  | 1.66492600  |
| H | -0.59032900 | 2.66354700  | -0.54168200 |
| H | 0.01612500  | 5.02047700  | -0.07707400 |
| H | -1.56762600 | 6.57044400  | 0.99365200  |
| C | -3.61979100 | 1.78138600  | 0.25460300  |
| C | -4.59129300 | 2.77707000  | 1.04279200  |
| H | -5.54270900 | 3.01311800  | 0.55511700  |
| H | -4.78840400 | 2.43409700  | 2.06398000  |
| O | -3.29353100 | 0.61965200  | 1.01464000  |
| C | -4.11192200 | 1.37827100  | -1.12830800 |
| C | -5.45984400 | 1.05997200  | -1.34802900 |
| C | -3.21980600 | 1.27611900  | -2.20463900 |
| C | -5.90411200 | 0.64495400  | -2.60587100 |
| H | -6.17106500 | 1.13216100  | -0.52974700 |
| C | -3.65880700 | 0.85986800  | -3.46363800 |
| H | -2.17587300 | 1.53832900  | -2.06358400 |
| C | -5.00371900 | 0.54217500  | -3.66884400 |
| H | -6.95426500 | 0.40778700  | -2.75512200 |
| H | -2.95151300 | 0.79554800  | -4.28645000 |
| H | -5.34857800 | 0.22682600  | -4.64993300 |
| O | -1.54922500 | 0.95869500  | 2.64663200  |
| H | -1.35308400 | 1.90253100  | 2.75422300  |
| H | -0.79719000 | 0.51580200  | 1.73550800  |
| H | -2.57376200 | 0.87709000  | 1.85921100  |

|    |             |             |             |
|----|-------------|-------------|-------------|
| C  | 3.34720800  | -2.16403200 | -0.91055200 |
| C  | 3.00268800  | -1.56609300 | -2.13832300 |
| C  | 3.45002400  | -3.66780600 | -0.67897000 |
| C  | 2.62820300  | -2.29674000 | -3.41362700 |
| C  | 0.90903800  | -3.52064200 | -0.66822300 |
| C  | 0.68986400  | -3.14134600 | -2.00738300 |
| C  | 2.12854300  | -4.24987000 | -0.13749000 |
| C  | 1.63505400  | -3.45234500 | -3.16443300 |
| H  | 3.74528400  | -4.16984700 | -1.60606900 |
| H  | 4.25358900  | -3.86291500 | 0.03969200  |
| H  | 3.53044400  | -2.66180700 | -3.92887900 |
| H  | 2.16528500  | -1.56629700 | -4.08718300 |
| H  | 2.11590800  | -4.15539900 | 0.95435400  |
| H  | 2.05612600  | -5.32741300 | -0.35326800 |
| H  | 1.04443500  | -3.62450800 | -4.07088100 |
| H  | 2.16929500  | -4.38770900 | -2.96821000 |
| H  | -0.33429100 | -2.92316100 | -2.29624500 |
| H  | 3.32299800  | -0.53547100 | -2.28373000 |
| H  | 0.03832800  | -3.59450300 | -0.02097300 |
| H  | 3.90391500  | -1.55068200 | -0.20958100 |
| Rh | 1.30940900  | -1.42766900 | -0.84826600 |
| C  | -3.97774700 | -2.58062300 | -0.42012100 |
| C  | -4.35734400 | -1.40640400 | 0.23912800  |
| C  | -5.68614800 | -1.19001100 | 0.59908000  |
| C  | -6.63893800 | -2.17054600 | 0.29825100  |
| C  | -6.26108900 | -3.34615800 | -0.35708400 |
| C  | -4.92546800 | -3.55805300 | -0.71910200 |
| C  | -2.49738300 | -2.57501800 | -0.70071600 |
| C  | -1.91505100 | -1.49576300 | 0.26482600  |
| H  | -5.98622000 | -0.27849700 | 1.10889300  |
| H  | -7.67734800 | -2.01679500 | 0.57919200  |
| H  | -7.00771600 | -4.10291900 | -0.58303500 |
| H  | -4.63358300 | -4.47656700 | -1.22280700 |
| H  | -2.03358600 | -3.55733400 | -0.57057200 |
| H  | -2.31126400 | -2.23764200 | -1.72405000 |
| O  | -0.78028100 | -0.85040600 | -0.29428300 |
| C  | -1.53848000 | -2.09397600 | 1.63621200  |
| C  | -0.53526700 | -1.47645000 | 2.40076500  |
| C  | -2.16121200 | -3.23247300 | 2.17125600  |
| C  | -0.16456900 | -1.97500800 | 3.64989800  |
| H  | -0.04068500 | -0.59585100 | 2.00691300  |
| C  | -1.78918300 | -3.73717300 | 3.42097500  |
| H  | -2.94653300 | -3.73701700 | 1.61923500  |
| C  | -0.78913000 | -3.11253900 | 4.16682700  |



|   |             |             |             |
|---|-------------|-------------|-------------|
| H | 0.61468300  | -1.47365500 | 4.21854000  |
| H | -2.28518600 | -4.62380600 | 3.80743600  |
| H | -0.49996800 | -3.50606900 | 5.13760900  |
| C | -3.16322500 | -0.47114900 | 0.43262400  |
| C | -3.21498000 | 0.28255400  | 1.76928900  |
| H | -3.29959000 | -0.42126400 | 2.59994000  |
| H | -2.32177500 | 0.89332400  | 1.92256500  |
| H | -4.07515700 | 0.95532700  | 1.79589800  |
| C | -3.19937800 | 0.48947500  | -0.78220800 |
| O | -3.08134500 | 0.13603600  | -1.93911600 |
| O | -3.45385600 | 1.76052400  | -0.42435700 |
| C | -3.48345400 | 2.73291900  | -1.50501000 |
| H | -4.43394100 | 2.62771400  | -2.03735800 |
| H | -2.67455900 | 2.49019100  | -2.19760600 |
| C | -3.32265700 | 4.10701700  | -0.91222200 |
| C | -4.38938000 | 5.01197300  | -0.89146400 |
| C | -2.08308000 | 4.49655900  | -0.38259500 |
| C | -4.22430000 | 6.29130700  | -0.35323300 |
| H | -5.35285300 | 4.71634200  | -1.30058100 |
| C | -1.91836300 | 5.77158400  | 0.15775400  |
| H | -1.25846900 | 3.78795000  | -0.39434400 |
| C | -2.98846700 | 6.67265900  | 0.17232900  |
| H | -5.05938200 | 6.98680800  | -0.34515700 |
| H | -0.95214400 | 6.06383200  | 0.56085100  |
| H | -2.85788500 | 7.66767700  | 0.58980700  |
| H | -0.71401600 | 0.26792700  | -0.08437400 |
| C | 5.64108000  | -0.10014400 | 2.04030300  |
| C | 4.43224800  | 0.38107100  | 1.55254400  |
| C | 4.30380200  | 0.87475300  | 0.25554100  |
| C | 5.36706700  | 0.92802600  | -0.63657900 |
| C | 6.59010300  | 0.42817800  | -0.16107800 |
| C | 6.72324200  | -0.07211100 | 1.14439300  |
| H | 5.76443900  | -0.48155200 | 3.05071400  |
| H | 5.27994100  | 1.33150600  | -1.64189100 |
| H | 7.45992800  | 0.43536700  | -0.81294900 |
| H | 7.69280100  | -0.44167600 | 1.46865200  |
| C | 2.83762500  | 1.29360600  | 0.45749800  |
| C | 2.97572800  | 0.63439100  | 1.90706000  |
| H | 2.36413600  | -0.27149300 | 1.97945300  |
| H | 2.76595500  | 1.27410000  | 2.77020200  |
| O | 1.87283300  | 0.68870000  | -0.38522400 |
| C | 2.69210900  | 2.82116000  | 0.41969200  |
| C | 2.13565300  | 3.44435400  | -0.70686500 |
| C | 3.18506300  | 3.63438700  | 1.45189400  |

|   |             |            |             |
|---|-------------|------------|-------------|
| C | 2.04982900  | 4.83618600 | -0.78748700 |
| H | 1.75602300  | 2.83272500 | -1.51699200 |
| C | 3.09858100  | 5.02513400 | 1.37370600  |
| H | 3.65512900  | 3.18807000 | 2.32283900  |
| C | 2.52677100  | 5.63412000 | 0.25421400  |
| H | 1.60867200  | 5.29489600 | -1.66853900 |
| H | 3.48203900  | 5.63233100 | 2.18961900  |
| H | 2.46078800  | 6.71706000 | 0.19199900  |
| O | -0.37663200 | 1.49568800 | -0.00078200 |
| H | -0.48338300 | 1.82280600 | 0.90567400  |
| H | 0.86882700  | 1.16299900 | -0.18051200 |

### TS8dRR

|    |             |             |             |
|----|-------------|-------------|-------------|
| C  | 1.17976000  | 3.45517000  | -1.82716200 |
| C  | -0.16693800 | 3.49799900  | -2.26473000 |
| C  | 1.81870900  | 4.37712500  | -0.80478400 |
| C  | -1.18283100 | 4.53309100  | -1.79001400 |
| C  | 0.13092400  | 3.29847700  | 0.76313300  |
| C  | -1.18498200 | 3.10006500  | 0.32281100  |
| C  | 0.95534900  | 4.54689300  | 0.46331100  |
| C  | -1.98482700 | 4.02649400  | -0.57205000 |
| H  | 2.78259700  | 3.93665700  | -0.52631300 |
| H  | 2.04619000  | 5.35499300  | -1.25738000 |
| H  | -1.87239500 | 4.76287900  | -2.60958300 |
| H  | -0.66847700 | 5.47101200  | -1.55380000 |
| H  | 0.28960400  | 5.41091200  | 0.36308800  |
| H  | 1.60533000  | 4.76287000  | 1.31838300  |
| H  | -2.38323800 | 4.87197800  | 0.01024000  |
| H  | -2.85129600 | 3.45668800  | -0.92339000 |
| H  | -1.78613400 | 2.37942500  | 0.86552200  |
| H  | -0.38405800 | 3.04394400  | -3.23194400 |
| H  | 0.44802000  | 2.71446200  | 1.62414000  |
| H  | 1.90123400  | 2.99368700  | -2.50420000 |
| Rh | 0.11215400  | 1.88317400  | -0.89402800 |
| C  | -0.94032500 | 0.66515800  | 3.12339400  |
| C  | -2.15020100 | 0.46431500  | 2.45135300  |
| C  | -3.28100300 | 1.21043300  | 2.79255500  |
| C  | -3.18119200 | 2.17948200  | 3.79482200  |
| C  | -1.96632300 | 2.39138300  | 4.45735800  |
| C  | -0.84092100 | 1.63075500  | 4.12736400  |
| C  | 0.11063100  | -0.30523800 | 2.65000400  |
| C  | -0.45370300 | -0.89869200 | 1.32053900  |
| H  | -4.22211600 | 1.05625800  | 2.27356900  |

|   |             |             |             |
|---|-------------|-------------|-------------|
| H | -4.05274200 | 2.77208700  | 4.06023900  |
| H | -1.89902500 | 3.14745300  | 5.23535900  |
| H | 0.09933500  | 1.78713000  | 4.65123200  |
| H | 1.08403600  | 0.15480100  | 2.45304900  |
| H | 0.27819300  | -1.06782100 | 3.41729900  |
| O | 0.02614300  | -0.10995600 | 0.23069600  |
| C | -0.08328800 | -2.37450000 | 1.07135300  |
| C | 0.15822400  | -3.28428700 | 2.11249000  |
| C | -0.02493400 | -2.86440300 | -0.24396000 |
| C | 0.45056600  | -4.62637700 | 1.85409400  |
| H | 0.11920800  | -2.96407700 | 3.14788000  |
| C | 0.26526800  | -4.20273100 | -0.50669400 |
| H | -0.19887500 | -2.18389100 | -1.06594900 |
| C | 0.50686300  | -5.09390300 | 0.54141800  |
| H | 0.63489300  | -5.30228400 | 2.68529300  |
| H | 0.30749300  | -4.54799100 | -1.53669400 |
| H | 0.73588000  | -6.13662500 | 0.33717200  |
| C | -2.04878100 | -0.69550900 | 1.47226900  |
| C | -2.76495400 | -1.91994000 | 2.10073500  |
| H | -2.32816000 | -2.15800900 | 3.07501200  |
| H | -3.82253100 | -1.68195900 | 2.26131300  |
| H | -2.69859600 | -2.80095000 | 1.46146500  |
| C | -2.69849000 | -0.39583800 | 0.11735200  |
| O | -3.15051200 | 0.68193800  | -0.22417400 |
| O | -2.74960200 | -1.49471300 | -0.65668100 |
| C | -3.33941400 | -1.35901700 | -1.98212400 |
| H | -2.79305100 | -2.08631900 | -2.58563100 |
| H | -3.13945600 | -0.35181800 | -2.35038300 |
| C | -4.81693300 | -1.66451100 | -1.96463200 |
| C | -5.26476900 | -2.98534000 | -2.10211700 |
| C | -5.76002600 | -0.64026800 | -1.80013600 |
| C | -6.62879800 | -3.28021200 | -2.07488500 |
| H | -4.53988300 | -3.78541000 | -2.23358400 |
| C | -7.12479300 | -0.93280600 | -1.77510500 |
| H | -5.41631200 | 0.38327600  | -1.68409600 |
| C | -7.56176500 | -2.25296300 | -1.91194000 |
| H | -6.96292500 | -4.30835900 | -2.18513200 |
| H | -7.84704900 | -0.13033100 | -1.65075500 |
| H | -8.62440500 | -2.47996700 | -1.89455200 |
| C | 4.50691100  | 0.16708300  | 2.86077400  |
| C | 4.06666600  | 0.05717400  | 1.54714100  |
| C | 3.74406100  | -1.17120700 | 0.97250800  |
| C | 3.79934800  | -2.36215600 | 1.68782900  |
| C | 4.23879700  | -2.26478300 | 3.01843500  |

|   |            |             |             |
|---|------------|-------------|-------------|
| C | 4.59098000 | -1.03165400 | 3.58875500  |
| H | 4.76805100 | 1.11698400  | 3.32132600  |
| H | 3.51081600 | -3.32109200 | 1.26636000  |
| H | 4.30686000 | -3.16418600 | 3.62566200  |
| H | 4.92664200 | -1.00622600 | 4.62274200  |
| C | 3.39262200 | -0.55249700 | -0.39455800 |
| C | 3.71627300 | 0.86050900  | 0.30900100  |
| H | 2.82379800 | 1.48927000  | 0.40410500  |
| H | 4.52492500 | 1.44911500  | -0.14030100 |
| O | 2.08515700 | -0.76711100 | -0.83667700 |
| C | 4.35013700 | -0.87912700 | -1.53951800 |
| C | 4.47286300 | 0.01850900  | -2.61189300 |
| C | 5.07215300 | -2.07647600 | -1.59315600 |
| C | 5.28864300 | -0.27120400 | -3.70561900 |
| H | 3.92686700 | 0.95932900  | -2.58544300 |
| C | 5.89150700 | -2.37273500 | -2.68660300 |
| H | 5.00212500 | -2.78179300 | -0.77063200 |
| C | 6.00292400 | -1.47229100 | -3.74694200 |
| H | 5.37273500 | 0.44150300  | -4.52242000 |
| H | 6.44464800 | -3.30840600 | -2.70621100 |
| H | 6.64233700 | -1.70023800 | -4.59565100 |
| O | 0.73516100 | 0.52526700  | -2.46404800 |
| H | 1.20420800 | 0.95117300  | -3.19922600 |
| H | 1.08706200 | -0.47116200 | -0.12617400 |
| H | 1.43998600 | -0.05189000 | -1.93576300 |

## TS8dRS

|   |             |             |             |
|---|-------------|-------------|-------------|
| C | -1.79885900 | -2.64720700 | 1.78192700  |
| C | -1.04850800 | -3.48752500 | 0.94457500  |
| C | -3.14685700 | -3.03056500 | 2.38510100  |
| C | -1.45777700 | -4.86365000 | 0.45226900  |
| C | -3.98639500 | -2.56125600 | 0.02108100  |
| C | -3.32760700 | -3.58153200 | -0.69873600 |
| C | -4.33115000 | -2.58536400 | 1.49809500  |
| C | -2.90418500 | -4.91292500 | -0.08660400 |
| H | -3.17593800 | -4.11259100 | 2.55398600  |
| H | -3.24212500 | -2.56601800 | 3.37246400  |
| H | -1.31361600 | -5.61169100 | 1.24761700  |
| H | -0.76507500 | -5.13676200 | -0.35177700 |
| H | -4.62821700 | -1.57018400 | 1.78079200  |
| H | -5.20936500 | -3.22559100 | 1.67643400  |
| H | -2.98018300 | -5.69982900 | -0.84492600 |
| H | -3.60350500 | -5.19217300 | 0.70924300  |

|    |             |             |             |
|----|-------------|-------------|-------------|
| H  | -3.45754100 | -3.57777900 | -1.78043500 |
| H  | 0.01757400  | -3.30321400 | 0.87829700  |
| H  | -4.56252800 | -1.84722100 | -0.56610800 |
| H  | -1.26449800 | -1.84521000 | 2.28800000  |
| Rh | -1.96839700 | -1.97204100 | -0.27515700 |
| C  | 2.08311500  | -2.33289200 | -0.27309800 |
| C  | 2.07923700  | -1.81851400 | -1.57235200 |
| C  | 2.43434700  | -2.62207200 | -2.65628300 |
| C  | 2.79460800  | -3.95469900 | -2.42677800 |
| C  | 2.80848900  | -4.46879500 | -1.12611900 |
| C  | 2.45575300  | -3.65750100 | -0.04162800 |
| C  | 1.69338400  | -1.26871800 | 0.71702100  |
| C  | 1.01872300  | -0.14544200 | -0.12919400 |
| H  | 2.43751800  | -2.22518100 | -3.66803700 |
| H  | 3.07036900  | -4.59055500 | -3.26380000 |
| H  | 3.09680800  | -5.50269400 | -0.95550500 |
| H  | 2.47342300  | -4.05916800 | 0.96905300  |
| H  | 1.02089000  | -1.61667600 | 1.50583200  |
| H  | 2.59273400  | -0.87915100 | 1.20435000  |
| O  | -0.38750900 | -0.37693500 | -0.21112700 |
| C  | 1.22163700  | 1.24118100  | 0.50987500  |
| C  | 1.30564500  | 1.35695900  | 1.90855000  |
| C  | 1.26063500  | 2.42375000  | -0.24244200 |
| C  | 1.45577500  | 2.59898200  | 2.52831000  |
| H  | 1.25789100  | 0.46811800  | 2.52950600  |
| C  | 1.41400500  | 3.66950200  | 0.37273300  |
| H  | 1.17610800  | 2.39121600  | -1.32087800 |
| C  | 1.51717000  | 3.76448400  | 1.75992500  |
| H  | 1.52554000  | 2.65350300  | 3.61186100  |
| H  | 1.43629600  | 4.56534200  | -0.24108600 |
| H  | 1.63632600  | 4.73290800  | 2.23820300  |
| C  | 1.69236900  | -0.34013800 | -1.59009500 |
| C  | 0.76948100  | -0.00982800 | -2.77055400 |
| H  | -0.07060400 | -0.70475800 | -2.78295800 |
| H  | 0.36641200  | 1.00206400  | -2.71395800 |
| H  | 1.31701100  | -0.10451600 | -3.71183100 |
| C  | 2.99025100  | 0.47626600  | -1.73897900 |
| O  | 3.23530200  | 1.23100200  | -2.66002100 |
| O  | 3.85881500  | 0.24215400  | -0.73474300 |
| C  | 5.08483700  | 1.02192400  | -0.75990800 |
| H  | 4.80948000  | 2.08004100  | -0.80449100 |
| H  | 5.63970700  | 0.77670400  | -1.66956500 |
| C  | 5.87271400  | 0.69618500  | 0.48058600  |
| C  | 5.43483600  | 1.14437300  | 1.73574300  |

|   |             |             |             |
|---|-------------|-------------|-------------|
| C | 7.05120000  | -0.05432500 | 0.40037500  |
| C | 6.16172300  | 0.84189700  | 2.88707100  |
| H | 4.52051900  | 1.72809700  | 1.80845200  |
| C | 7.78472900  | -0.35253000 | 1.55163700  |
| H | 7.39720500  | -0.40638400 | -0.56855500 |
| C | 7.34013700  | 0.09420900  | 2.79716500  |
| H | 5.81329500  | 1.19435900  | 3.85422400  |
| H | 8.69966400  | -0.93365600 | 1.47444300  |
| H | 7.90875500  | -0.13632800 | 3.69409800  |
| C | -5.32952300 | 1.46254700  | 1.46454600  |
| C | -4.37672000 | 1.73792900  | 0.49055000  |
| C | -3.02533900 | 1.88713200  | 0.79513500  |
| C | -2.53719400 | 1.76633000  | 2.09166600  |
| C | -3.48781300 | 1.47529200  | 3.08430100  |
| C | -4.85075700 | 1.32878200  | 2.77897800  |
| H | -6.38908800 | 1.35638500  | 1.24447500  |
| H | -1.48748500 | 1.89164700  | 2.34093900  |
| H | -3.16601400 | 1.37015700  | 4.11772700  |
| H | -5.55048900 | 1.11331400  | 3.58302000  |
| C | -2.62392700 | 2.18990100  | -0.66417500 |
| C | -4.18959000 | 1.99525600  | -0.99308600 |
| H | -4.38395400 | 1.14364600  | -1.65347300 |
| H | -4.69080200 | 2.88239200  | -1.39569200 |
| O | -1.79617200 | 1.25178000  | -1.29757500 |
| C | -2.15454100 | 3.61680700  | -0.95238700 |
| C | -1.47512500 | 3.89165900  | -2.14773000 |
| C | -2.43973400 | 4.68369400  | -0.08895200 |
| C | -1.08817700 | 5.19351200  | -2.47015100 |
| H | -1.24806800 | 3.07031500  | -2.81871500 |
| C | -2.05220100 | 5.98774700  | -0.40791800 |
| H | -2.96010900 | 4.49511000  | 0.84571200  |
| C | -1.37394700 | 6.24945600  | -1.60008000 |
| H | -0.56134500 | 5.38341300  | -3.40233600 |
| H | -2.27750300 | 6.79873700  | 0.28041900  |
| H | -1.07069100 | 7.26333500  | -1.84836100 |
| H | -1.01681500 | 0.54456100  | -0.64697700 |
| O | -2.69760400 | -0.93996400 | -2.06290600 |
| H | -2.39790100 | 0.04734000  | -1.85586300 |
| H | -2.17807500 | -1.22950300 | -2.83061700 |

### TS8dSR

|   |            |            |            |
|---|------------|------------|------------|
| C | 0.41830800 | 3.15374800 | 0.35784600 |
| C | 0.04516200 | 2.44574700 | 1.51010700 |

|    |             |             |             |
|----|-------------|-------------|-------------|
| C  | 0.19180200  | 4.64812500  | 0.14773500  |
| C  | -0.68058100 | 3.01006800  | 2.71571800  |
| C  | -2.22557600 | 3.92876600  | -0.24293100 |
| C  | -2.54108200 | 3.43775100  | 1.04250100  |
| C  | -1.14394500 | 4.94151600  | -0.57182500 |
| C  | -1.87651700 | 3.90819700  | 2.33248800  |
| H  | 0.23227600  | 5.16843700  | 1.11077500  |
| H  | 1.01649300  | 5.05265400  | -0.44933100 |
| H  | 0.02327800  | 3.55605900  | 3.36370200  |
| H  | -1.04329200 | 2.16160900  | 3.30646400  |
| H  | -0.97830800 | 4.90197200  | -1.65456000 |
| H  | -1.48907200 | 5.96363900  | -0.34986400 |
| H  | -2.61489700 | 3.89618400  | 3.14198900  |
| H  | -1.55918400 | 4.95121700  | 2.22818500  |
| H  | -3.52161700 | 2.97784400  | 1.15773900  |
| H  | 0.57405900  | 1.51152300  | 1.67876500  |
| H  | -3.00475700 | 3.84124500  | -1.00145100 |
| H  | 1.19116400  | 2.69628100  | -0.25285000 |
| Rh | -1.37373200 | 1.99317000  | -0.04238900 |
| C  | 1.34567400  | -2.40016500 | -2.63259200 |
| C  | 2.31893900  | -2.15276000 | -1.65404100 |
| C  | 3.49308600  | -2.91198200 | -1.63715300 |
| C  | 3.69926300  | -3.87933500 | -2.62580000 |
| C  | 2.74049300  | -4.09867500 | -3.61974200 |
| C  | 1.55361800  | -3.36130300 | -3.62169800 |
| C  | 0.12010200  | -1.56426800 | -2.39964900 |
| C  | 0.60504600  | -0.39579400 | -1.46557400 |
| H  | 4.24668200  | -2.74845200 | -0.87589300 |
| H  | 4.61651500  | -4.46258500 | -2.62077300 |
| H  | 2.91546400  | -4.84766600 | -4.38777000 |
| H  | 0.79763800  | -3.53824200 | -4.38320000 |
| H  | -0.33311200 | -1.17898400 | -3.31854100 |
| H  | -0.65556300 | -2.14495500 | -1.88754100 |
| O  | -0.44003400 | 0.03625500  | -0.61680100 |
| C  | 1.05620600  | 0.74427400  | -2.40281100 |
| C  | 0.06542900  | 1.57766800  | -2.95071100 |
| C  | 2.37214700  | 0.92827400  | -2.84981200 |
| C  | 0.37721200  | 2.58284300  | -3.86532700 |
| H  | -0.96822900 | 1.42302200  | -2.66118100 |
| C  | 2.69157000  | 1.93812900  | -3.76498200 |
| H  | 3.16974600  | 0.28147100  | -2.50665600 |
| C  | 1.70008400  | 2.77609400  | -4.27214600 |
| H  | -0.41564200 | 3.20919400  | -4.26698700 |
| H  | 3.72393000  | 2.05907100  | -4.08305800 |

|   |             |             |             |
|---|-------------|-------------|-------------|
| H | 1.94965400  | 3.55871100  | -4.98355700 |
| C | 1.81276100  | -1.10797800 | -0.65924100 |
| C | 1.24475700  | -1.84261900 | 0.58556500  |
| H | 2.05293300  | -2.36396900 | 1.11079200  |
| H | 0.76814600  | -1.13619500 | 1.26608200  |
| H | 0.50799800  | -2.58982400 | 0.28186500  |
| C | 2.83134600  | -0.12056100 | -0.08537300 |
| O | 2.52786800  | 0.80138200  | 0.64772700  |
| O | 4.11241800  | -0.40055100 | -0.40585800 |
| C | 5.14722500  | 0.44933500  | 0.17583300  |
| H | 4.74932500  | 1.45980700  | 0.27634200  |
| H | 5.94195300  | 0.43759100  | -0.57240700 |
| C | 5.63256500  | -0.09476400 | 1.49623500  |
| C | 5.08308900  | 0.35577000  | 2.70473800  |
| C | 6.63813500  | -1.07089400 | 1.52813000  |
| C | 5.53179500  | -0.16118800 | 3.92143900  |
| H | 4.29851800  | 1.10611500  | 2.68443000  |
| C | 7.08573900  | -1.59102400 | 2.74350200  |
| H | 7.07504600  | -1.42069500 | 0.59546000  |
| C | 6.53272300  | -1.13580200 | 3.94323500  |
| H | 5.10067100  | 0.19758800  | 4.85218900  |
| H | 7.86770900  | -2.34547600 | 2.75470800  |
| H | 6.88251600  | -1.53673600 | 4.89077300  |
| C | -1.56540600 | -3.02835400 | 3.32416600  |
| C | -2.12448300 | -2.74826100 | 2.08275800  |
| C | -2.71819700 | -1.52032200 | 1.79811900  |
| C | -2.78610100 | -0.49147800 | 2.73081300  |
| C | -2.21433800 | -0.75749500 | 3.98645400  |
| C | -1.61987400 | -1.99624800 | 4.27544600  |
| H | -1.10379500 | -3.98273600 | 3.56500900  |
| H | -3.25146200 | 0.46788900  | 2.52020100  |
| H | -2.23840100 | 0.00769300  | 4.75873600  |
| H | -1.19333900 | -2.15720900 | 5.26252500  |
| C | -3.10200900 | -1.92387100 | 0.35984500  |
| C | -2.39576000 | -3.32768200 | 0.70568300  |
| H | -3.05371900 | -4.20320600 | 0.66912400  |
| H | -1.51566200 | -3.51887100 | 0.08282700  |
| O | -2.49936200 | -1.20552400 | -0.68245700 |
| H | -1.38133800 | -0.70463100 | -0.55880900 |
| C | -4.59704100 | -2.07896900 | 0.08076700  |
| C | -5.04702600 | -2.15537200 | -1.24621700 |
| C | -5.53991400 | -2.20020000 | 1.11117500  |
| C | -6.39923000 | -2.34635400 | -1.53438200 |
| H | -4.32450700 | -2.05964300 | -2.04988100 |



|   |             |             |             |
|---|-------------|-------------|-------------|
| C | -6.89417900 | -2.39054400 | 0.82465100  |
| H | -5.21653800 | -2.13820300 | 2.14612500  |
| C | -7.33052400 | -2.46466100 | -0.49943300 |
| H | -6.72608000 | -2.40196900 | -2.56999500 |
| H | -7.60859000 | -2.47527000 | 1.63979000  |
| H | -8.38423500 | -2.60997800 | -0.72282900 |
| O | -3.21979400 | 1.18978800  | -0.92271400 |
| H | -3.28268700 | 1.41124100  | -1.86589900 |
| H | -3.06346900 | 0.15966900  | -0.87428900 |

## TS8dSS

|    |             |             |             |
|----|-------------|-------------|-------------|
| C  | 1.04548000  | 3.96426400  | -0.53270700 |
| C  | -0.33338500 | 3.86745800  | -0.28337000 |
| C  | 1.67084100  | 4.87042500  | -1.58811900 |
| C  | -1.43023800 | 4.56639000  | -1.06568100 |
| C  | 0.87230600  | 3.04677400  | -3.16225100 |
| C  | -0.52652800 | 3.18082200  | -3.00799700 |
| C  | 1.91551000  | 4.11763400  | -2.90990800 |
| C  | -1.23227100 | 4.47111400  | -2.59656100 |
| H  | 1.02933700  | 5.74244000  | -1.75207500 |
| H  | 2.62168700  | 5.25947600  | -1.20774800 |
| H  | -1.51771800 | 5.61833200  | -0.75279000 |
| H  | -2.37933200 | 4.08766900  | -0.80050000 |
| H  | 2.89051700  | 3.61890100  | -2.86362900 |
| H  | 1.96638500  | 4.81807400  | -3.75795700 |
| H  | -2.20962600 | 4.51319900  | -3.08876200 |
| H  | -0.66849700 | 5.33401500  | -2.96746100 |
| H  | -1.14827700 | 2.46300500  | -3.54264200 |
| H  | -0.61630500 | 3.53911300  | 0.71402000  |
| H  | 1.21591500  | 2.25892600  | -3.83454500 |
| H  | 1.70751200  | 3.67118500  | 0.27770100  |
| Rh | 0.27380600  | 2.10080600  | -1.34640100 |
| C  | -1.19289600 | -1.49525600 | 2.83796100  |
| C  | -2.29232800 | -0.70039700 | 2.49106000  |
| C  | -3.55306300 | -0.96511700 | 3.02548000  |
| C  | -3.70445500 | -2.03450300 | 3.91663100  |
| C  | -2.60522200 | -2.82408500 | 4.26728000  |
| C  | -1.34119400 | -2.55618100 | 3.72899700  |
| C  | 0.04295900  | -1.03654700 | 2.11347000  |
| C  | -0.28601200 | 0.43035300  | 1.65546000  |
| H  | -4.41182300 | -0.35292000 | 2.76319800  |
| H  | -4.68163600 | -2.24638600 | 4.34243900  |
| H  | -2.73117100 | -3.64685800 | 4.96615800  |

|   |             |             |             |
|---|-------------|-------------|-------------|
| H | -0.48596800 | -3.16729700 | 4.00722800  |
| H | 0.95582500  | -1.08018400 | 2.71436400  |
| H | 0.20034000  | -1.65561600 | 1.22492000  |
| O | 0.35281300  | 0.71722500  | 0.42552000  |
| C | 0.21567600  | 1.38276900  | 2.76561300  |
| C | 1.38492900  | 2.12415300  | 2.54868300  |
| C | -0.36636400 | 1.45022100  | 4.04477500  |
| C | 1.93772000  | 2.92875200  | 3.54885400  |
| H | 1.87068900  | 2.05092100  | 1.58441100  |
| C | 0.18117500  | 2.25451200  | 5.04594900  |
| H | -1.25159600 | 0.86873400  | 4.27513300  |
| C | 1.33430000  | 3.00416100  | 4.80382800  |
| H | 2.84527700  | 3.49119900  | 3.34340700  |
| H | -0.29780100 | 2.28993200  | 6.02113100  |
| H | 1.75863800  | 3.62981500  | 5.58446900  |
| C | -1.89801700 | 0.40233300  | 1.51092700  |
| C | -2.62835700 | 1.72936400  | 1.77046200  |
| H | -2.44042300 | 2.10032300  | 2.77799000  |
| H | -2.32362500 | 2.48761700  | 1.04976200  |
| H | -3.70774400 | 1.59322100  | 1.64998600  |
| C | -2.25598600 | -0.02349600 | 0.06917000  |
| O | -2.74205900 | 0.71919300  | -0.75999100 |
| O | -2.00925400 | -1.32796900 | -0.17008400 |
| C | -2.36424000 | -1.81891000 | -1.48746700 |
| H | -1.79485400 | -2.74915200 | -1.56977300 |
| H | -2.00226300 | -1.11567500 | -2.23871000 |
| C | -3.84599500 | -2.08024200 | -1.63158200 |
| C | -4.56291900 | -2.72673800 | -0.61520000 |
| C | -4.51078600 | -1.72180800 | -2.80962400 |
| C | -5.92047800 | -3.00651600 | -0.77661200 |
| H | -4.05772500 | -2.99810800 | 0.30758400  |
| C | -5.86689900 | -2.01136400 | -2.97725500 |
| H | -3.96504800 | -1.20972600 | -3.59862400 |
| C | -6.57566200 | -2.65347400 | -1.95990600 |
| H | -6.46683400 | -3.50393900 | 0.02047700  |
| H | -6.37019000 | -1.72615400 | -3.89728700 |
| H | -7.63218900 | -2.87450700 | -2.08579300 |
| H | 1.16676300  | -0.05240500 | 0.05415800  |
| C | 2.32876400  | -4.44331500 | -2.93968600 |
| C | 2.26393400  | -3.49914600 | -1.92145200 |
| C | 3.15667300  | -2.43293000 | -1.84652200 |
| C | 4.15908400  | -2.22711400 | -2.78601700 |
| C | 4.22834300  | -3.16818000 | -3.82638400 |
| C | 3.33738400  | -4.25114600 | -3.89853100 |

|   |            |             |             |
|---|------------|-------------|-------------|
| H | 1.64595600 | -5.28636300 | -3.01243000 |
| H | 4.86115600 | -1.39882800 | -2.73231200 |
| H | 4.99190200 | -3.06321800 | -4.59337300 |
| H | 3.43308300 | -4.95656500 | -4.72041700 |
| C | 2.54198600 | -1.86653200 | -0.54948500 |
| C | 1.49892800 | -3.08971000 | -0.67429400 |
| H | 0.47971300 | -2.73136600 | -0.85085500 |
| H | 1.48659800 | -3.80496600 | 0.15554000  |
| O | 1.99858200 | -0.59346000 | -0.71170300 |
| C | 3.47289800 | -1.95034500 | 0.66260100  |
| C | 4.07354300 | -3.16370600 | 1.03733000  |
| C | 3.76888700 | -0.80595400 | 1.41159800  |
| C | 4.92982700 | -3.23073600 | 2.13587100  |
| H | 3.87948700 | -4.06418700 | 0.46024800  |
| C | 4.62502500 | -0.87004500 | 2.51529000  |
| H | 3.31954500 | 0.13654000  | 1.12239200  |
| C | 5.20858900 | -2.08234900 | 2.88367400  |
| H | 5.38170100 | -4.18139400 | 2.40800500  |
| H | 4.83252400 | 0.03194100  | 3.08582700  |
| H | 5.87442500 | -2.13461400 | 3.74110000  |
| O | 0.31322200 | 0.18167300  | -2.37912100 |
| H | 1.05347600 | -0.29671100 | -1.81418800 |
| H | 0.65569400 | 0.24907000  | -3.28481200 |
